# Supplementary material for: Distinct Chemical Determinants are Essential for Achieving Ligands for Superior Optical Detection of Specific Amyloid‐β Deposits in Alzheimer's Disease
Source: PubMed Central journal article supplement (PMC11625938; doi:10.1002/open.202400186), 2024-11-07

# ChemistryOpen

Supporting Information

## **Distinct Chemical Determinants are Essential for Achieving Ligands for Superior Optical Detection of Specific Amyloid- $\beta$ Deposits in Alzheimer's Disease**

Xiongyu Wu, Hamid Shirani, Ruben Vidal, Bernardino Ghetti, Martin Ingelsson, Thérèse Klingstedt, and K. Peter R. Nilsson\*

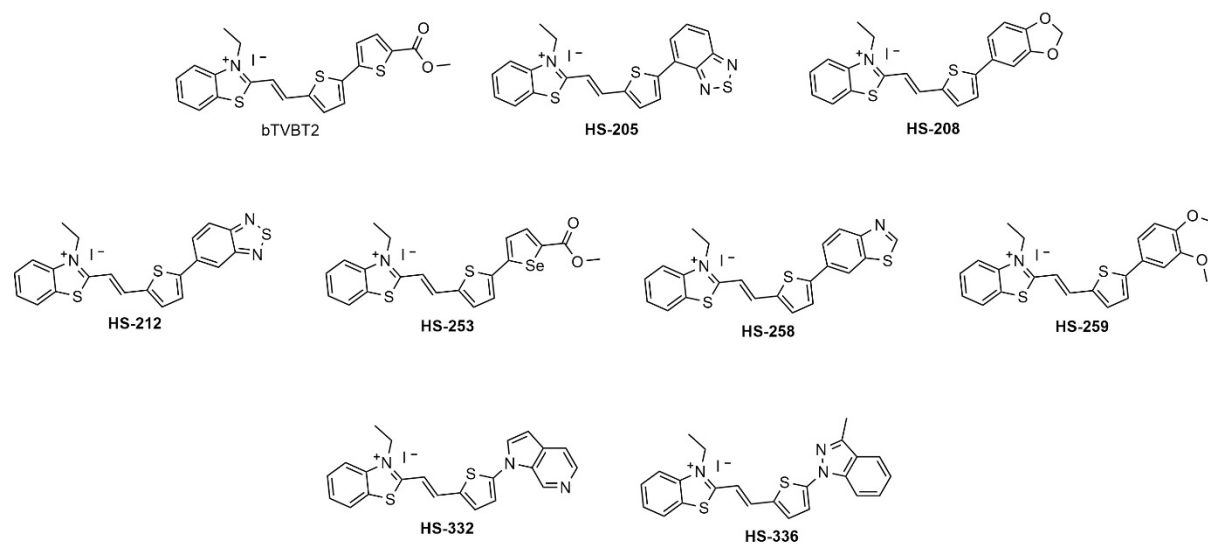

**Figure S1.** Chemical structure of TVB based ligands with different terminal heterocyclic moieties.

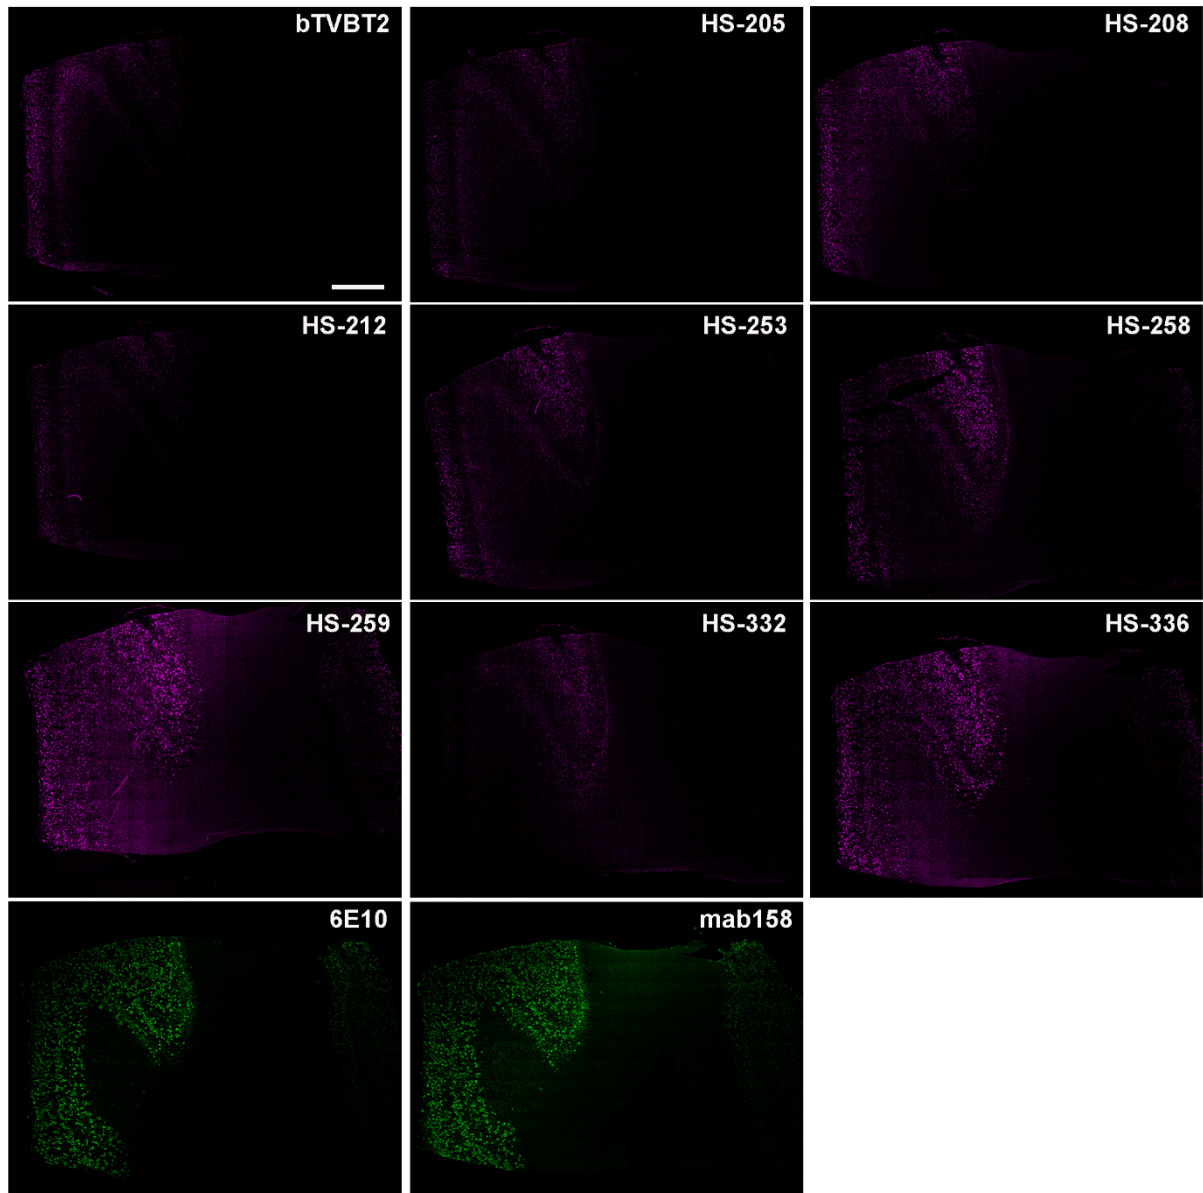

**Figure S2.** Overview tile fluorescence images of brain tissue sections from a case of diAD associated with the Arctic *APP E693G* mutation stained with the ligands bTVBT, HS-205, HS-208, HS-212, HS-253, HS-258, HS-259, HS-332 or HS-336, as well as the antibodies 6E10 or mab158. The fluorescence from the respective ligand is shown in magenta, whereas antibody staining is shown in green. Scale bar represents 2 mm.

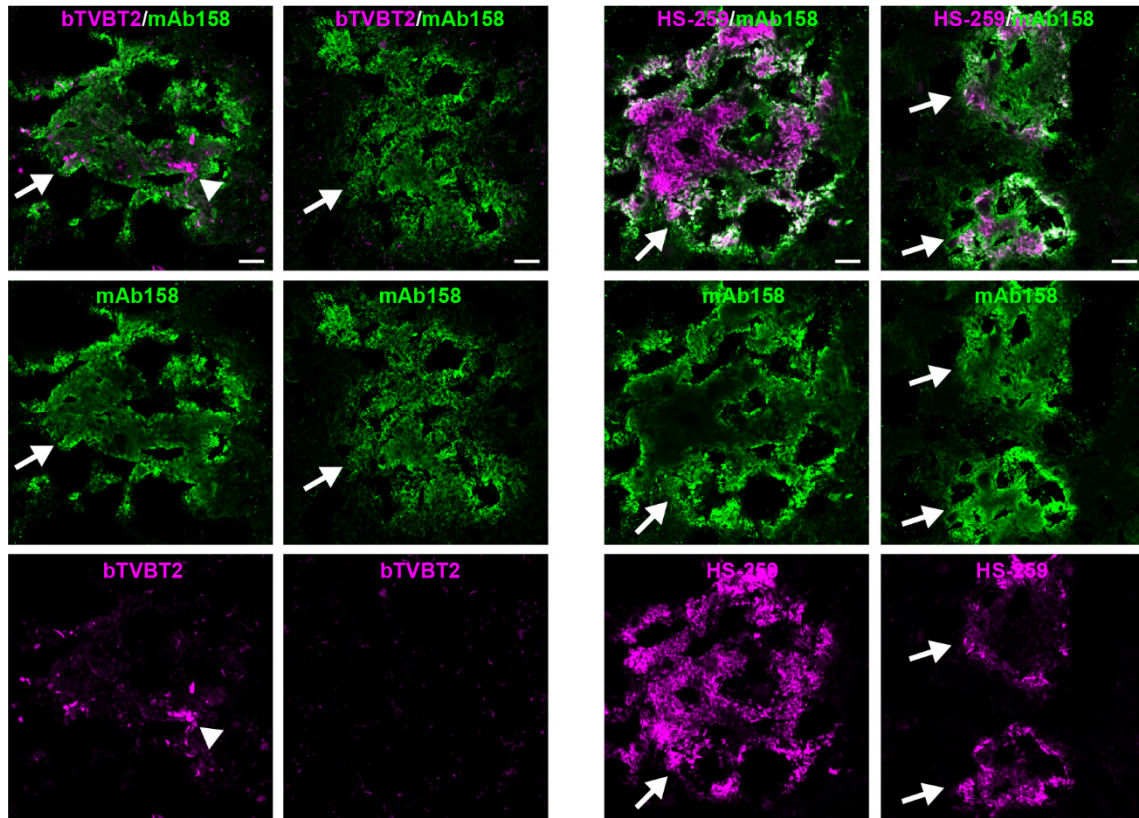

**Figure S3.** Images of a tissue sections co-stained with bTVBT2 (magenta, left panel) or HS-259 (magenta, right panel) and the antibody mAb158. A $\beta$  deposits are indicated by white arrows, whereas tau aggregates are indicated by white arrow heads. Scale bar represents 20  $\mu$ m.

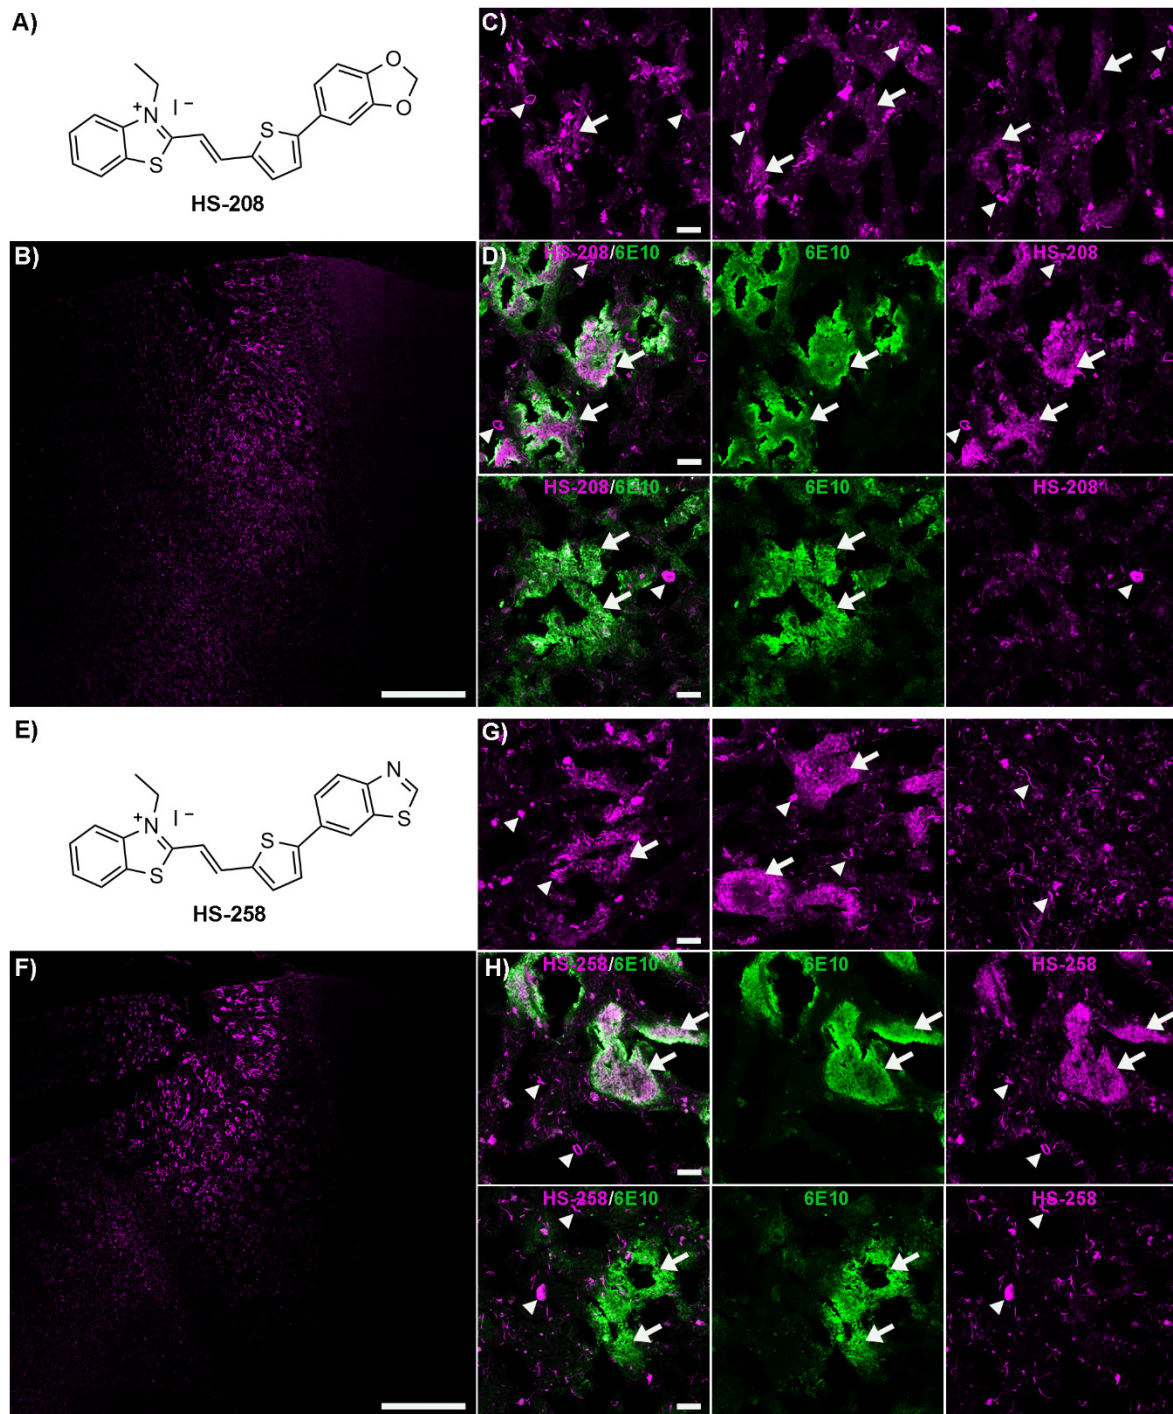

**Figure S4. Staining of human brain tissue sections (frontal cortex) from an individual with diAD caused by the Arctic *APP E693G* mutation with HS-208 or HS-258. A)** Chemical structure of HS-208. **B)** Overview tile image of a brain tissue section from an individual with diAD caused by the Arctic *APP E693G* mutation stained with HS-208. **C)** Images of protein deposits stained with HS-208. **D)** Images of a tissue section co-stained with HS-208 (magenta) and the A $\beta$  antibody 6E10 (green). **E)** Chemical structure of HS-258. **F)** Overview tile image of a brain tissue section from an individual with diAD caused by the Arctic *APP E693G* mutation stained with HS-258. **G)** Images of different protein deposits stained with HS-258. **H)** Images of a tissue section co-stained with HS-258 (magenta) and the A $\beta$  antibody 6E10 (green). In C, D, G and H, A $\beta$ -deposits are indicated by white arrows, whereas tau aggregates are indicated by white arrow heads. Scale bars represent 1 mm (B and F) and 20  $\mu$ m (C, D, G and H).

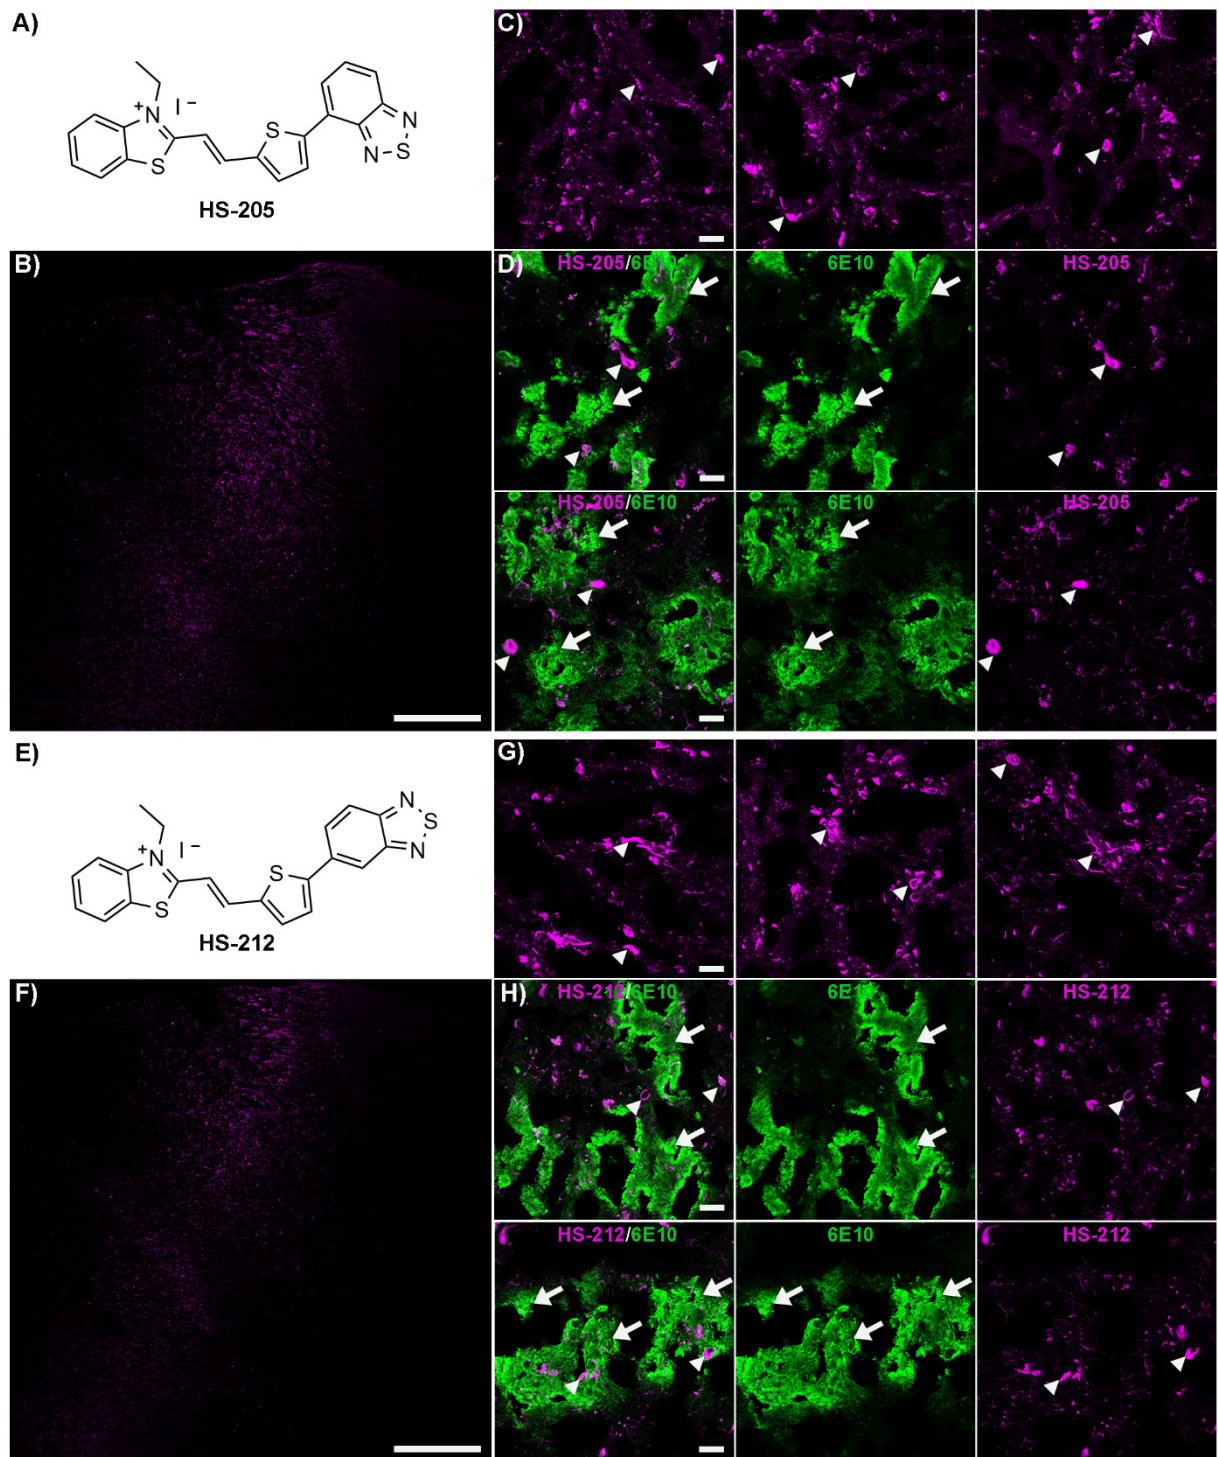

**Figure S5. Staining of human brain tissue sections (frontal cortex) from an individual with diAD caused by the Arctic *APP E693G* mutation with HS-205 or HS-212. A)** Chemical structure of HS-205. **B)** Overview tile image of a brain tissue section from an individual with diAD caused by the Arctic *APP E693G* mutation stained with HS-205. **C)** Images of protein deposits stained with HS-205. **D)** Images of a tissue section co-stained with HS-205 (magenta) and the A $\beta$  antibody 6E10 (green). **E)** Chemical structure of HS-212. **F)** Overview tile image of a brain tissue section from an individual with diAD caused by the Arctic *APP E693G* mutation stained with HS-212. **G)** Images of different protein deposits stained with HS-212. **H)** Images of a tissue section co-stained with HS-212 (magenta) and the A $\beta$  antibody 6E10 (green). In C, D, G and H, A $\beta$ -deposits are indicated by white arrows, whereas tau aggregates are indicated by white arrow heads. Scale bars represent 1 mm (B and F) and 20  $\mu$ m (C, D, G and H).

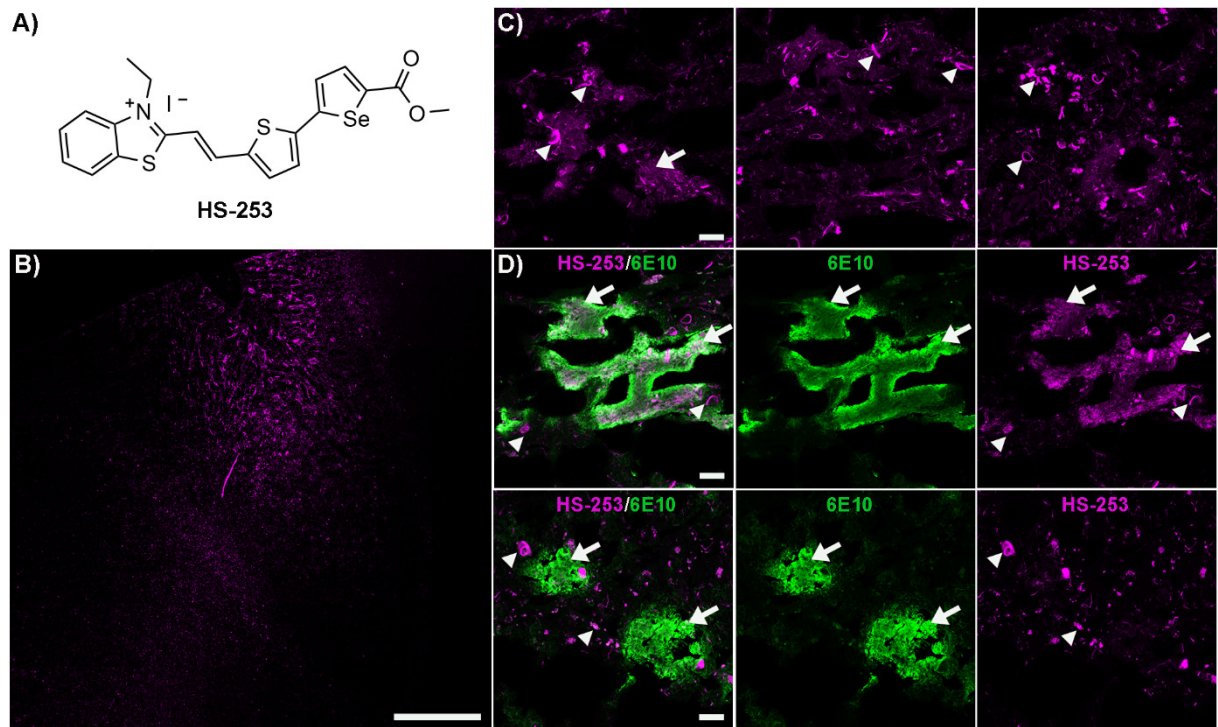

**Figure S6. Staining of human brain tissue sections (frontal cortex) from an individual with diAD caused by the Arctic *APP E693G* mutation with HS-253. A)** Chemical structure of HS-253. **B)** Overview tile image of a brain tissue section from an individual with diAD caused by the Arctic *APP E693G* mutation stained with HS-253. **C)** Images of protein deposits stained with HS-253. **D)** Images of a tissue section co-stained by HS-253 (magenta) and the A $\beta$  antibody 6E10 (green). In C and D, A $\beta$ -deposits are indicated by white arrows, whereas tau aggregates are indicated by white arrow heads. Scale bars represent 1 mm (B and F) and 20  $\mu$ m (C, D, G and H).

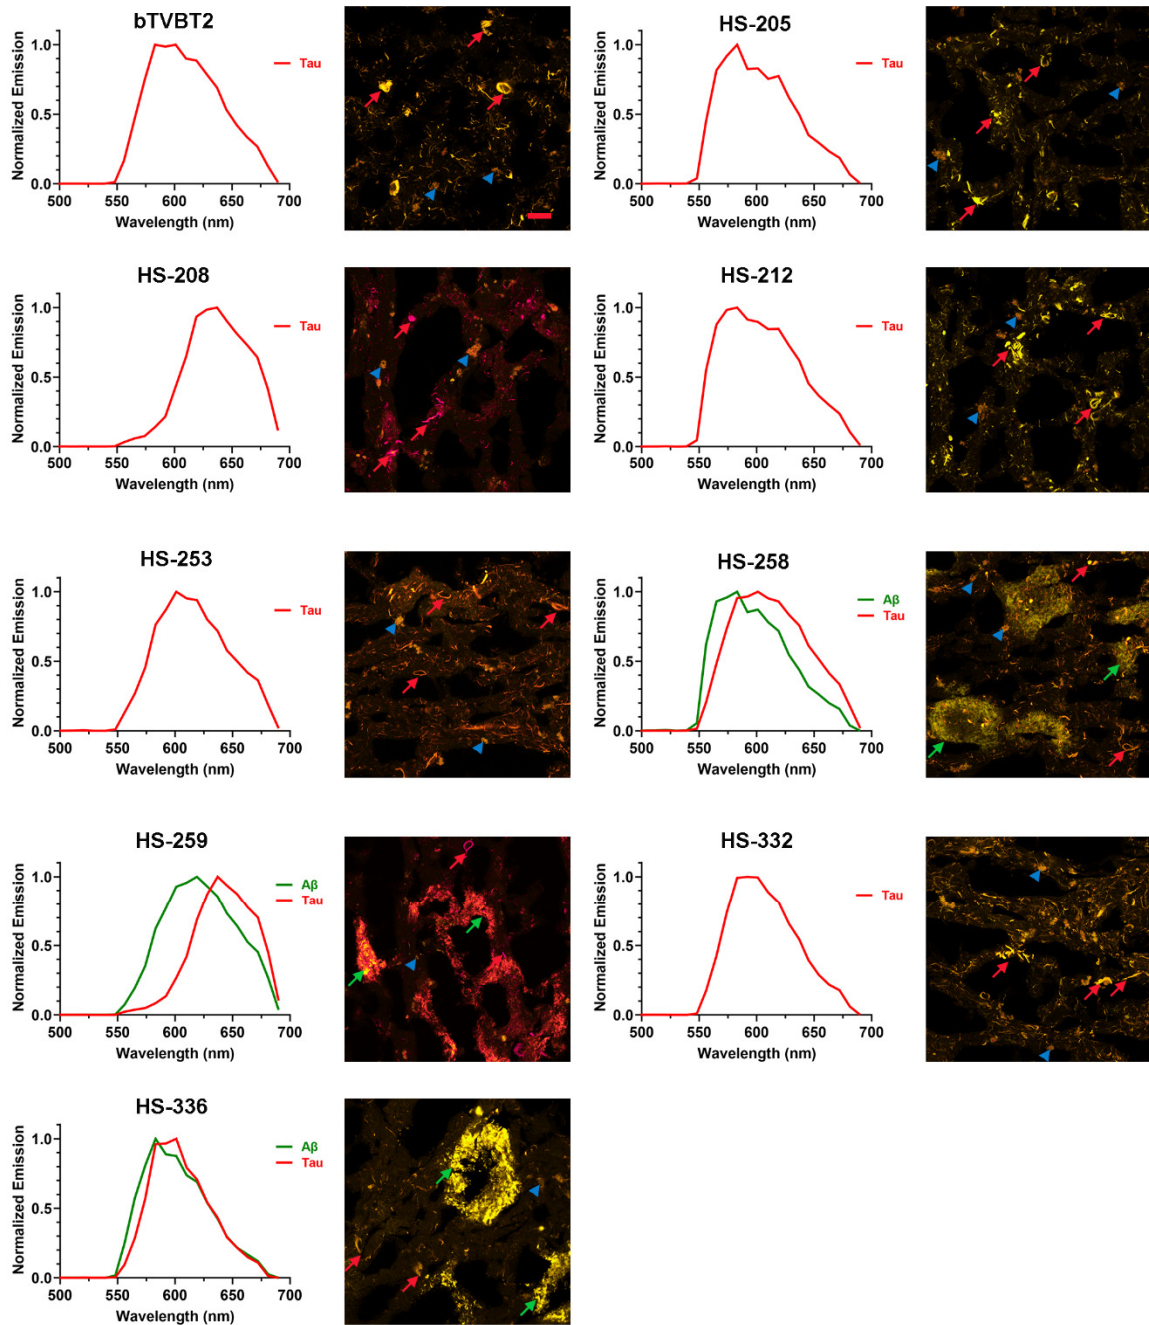

**Figure S7. Spectral assignment of A $\beta$  and tau deposits in a brain tissue section from an individual with diAD associated with the Arctic APP E693G mutation stained with TVB based ligands.** The emission spectrum (left) of the respective ligand when bound to A $\beta$  deposits (green) or tau aggregates (red) and spectral image (right) of protein aggregates when stained with the respective ligand. A $\beta$  aggregates are indicated by green arrows, whereas tau aggregates are highlighted by red arrows. Granular auto-fluorescent lipofuscin is indicated with blue arrow heads. Scale bar represents 20  $\mu$ m.



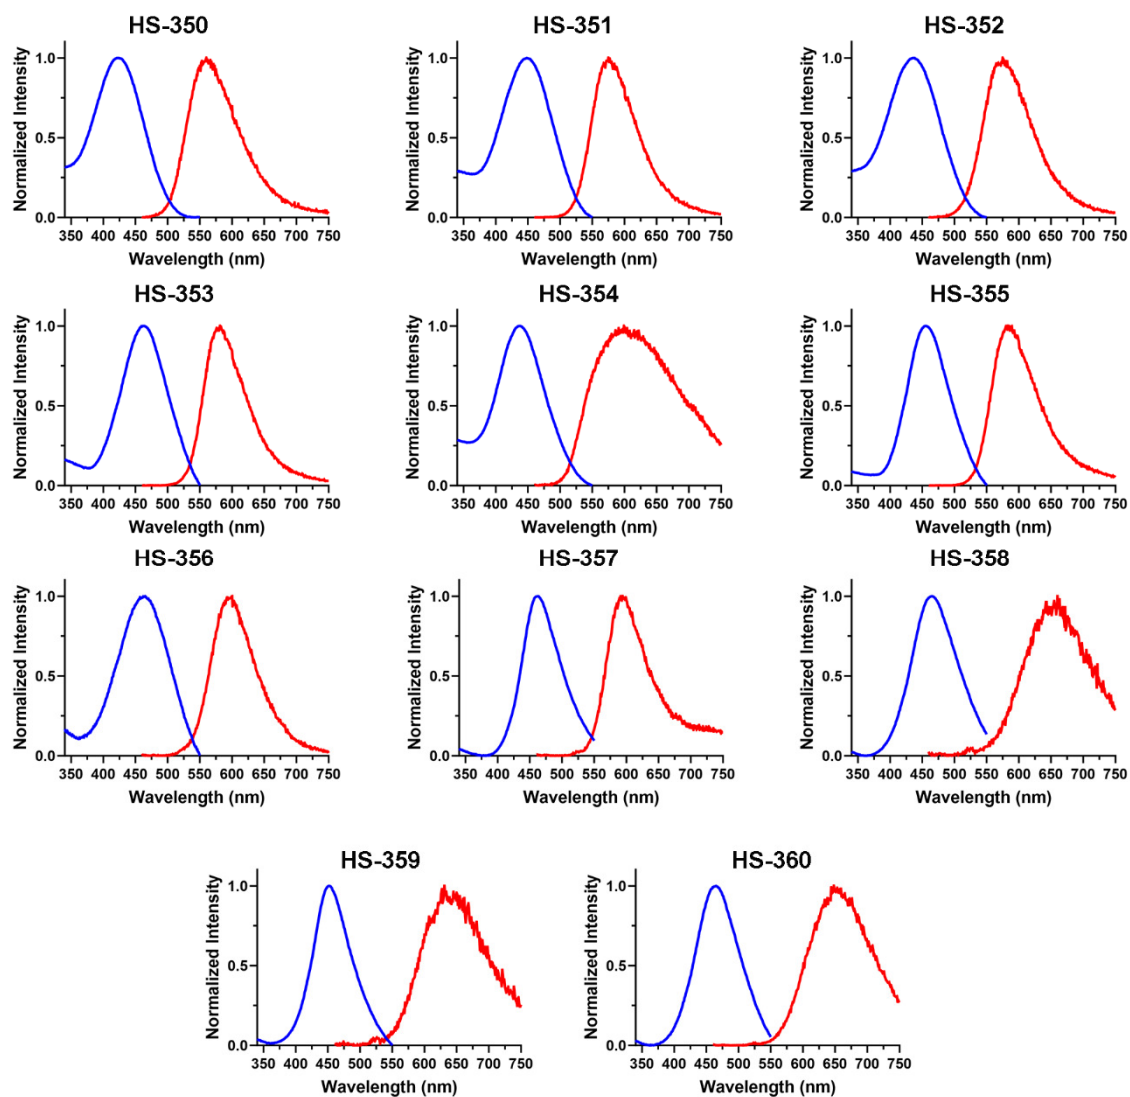

**Figure S8. Optical characteristics of TVB based ligands.** The absorption- (blue) and emission (red) spectrum from the respective ligand (30  $\mu$ M) in phosphate buffered saline (PBS) pH 7.4.

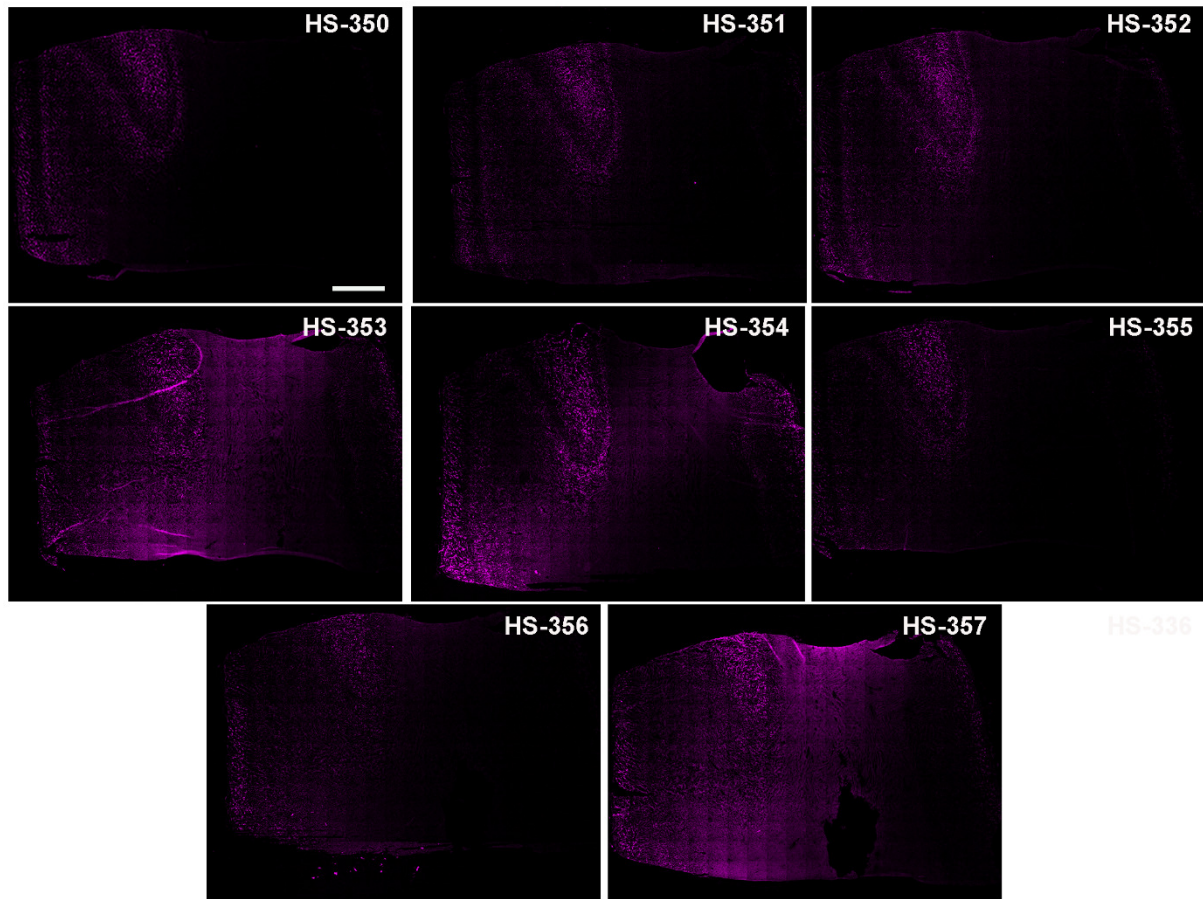

**Figure S9.** Overview tile fluorescence images of brain tissue sections from a case of diAD associated with the Arctic *APP E693G* mutation stained with the ligands HS-350, HS-351, HS-352, HS-353, HS-354, HS-355, HS-356 or HS-357. The fluorescence from the ligand is shown in magenta. Scale bar represents 2 mm.

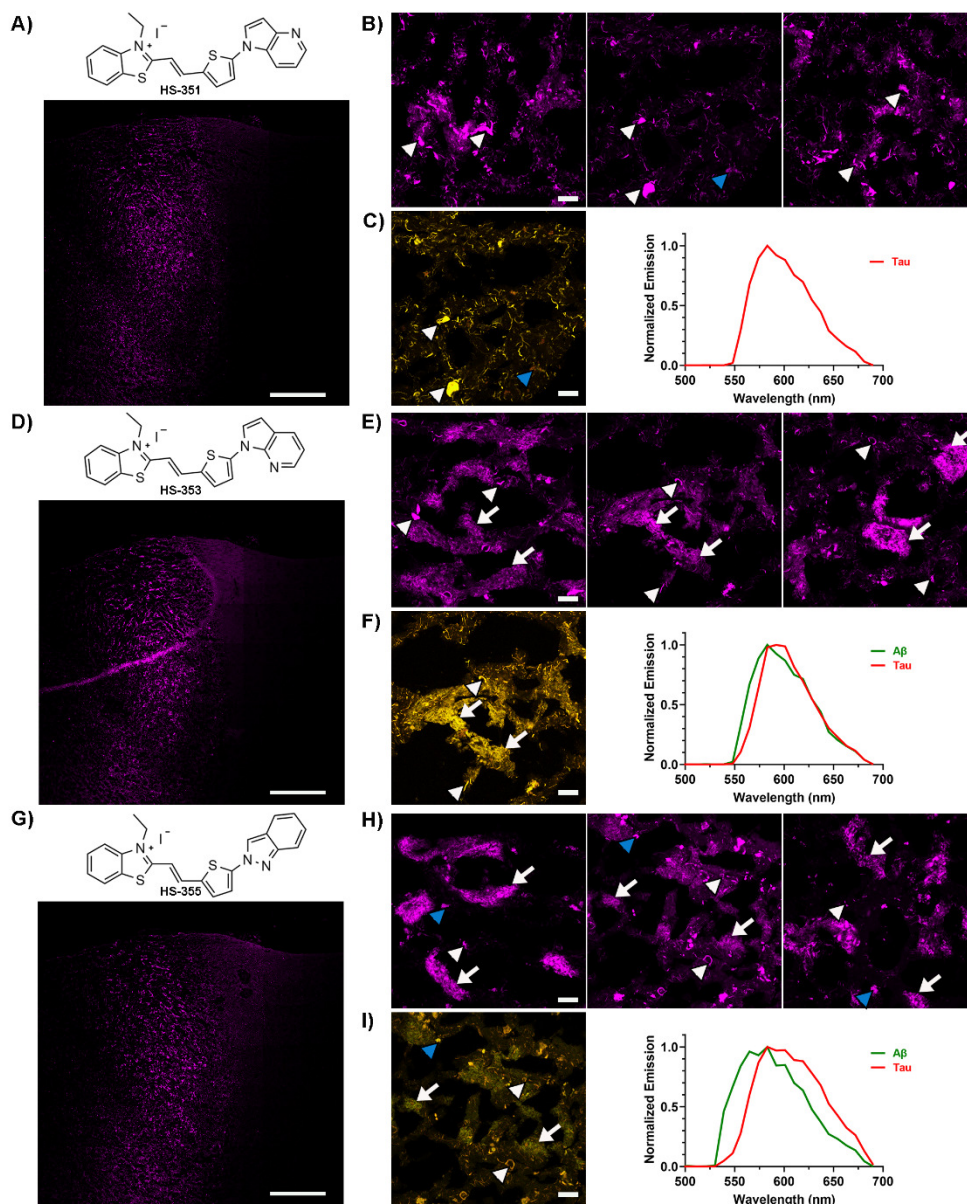

**Figure S10. Staining of human brain tissue sections (frontal cortex) from an individual with diAD caused by the Arctic *APP E693G* mutation with HS-351, HS-353 or HS-355. A)** Chemical structure of HS-351 and overview tile image of a brain tissue section from an individual with diAD caused by the Arctic *APP E693G* mutation stained by HS-351. **B)** Images of protein deposits stained with HS-351. **C)** Spectral image and the emission spectrum from HS-351 when bound to tau aggregates (red). **D)** Chemical structure of HS-353 and overview tile image of a brain tissue section from an individual with diAD caused by the Arctic *APP E693G* mutation stained by HS-353. **E)** Images of protein deposits stained with HS-353. **F)** Spectral image and the emission spectrum from HS-353 when bound to A $\beta$  deposits (green) or tau aggregates (red). **G)** Chemical structure of HS-355 and overview tile image of a brain tissue section from an individual with diAD caused by the Arctic *APP E693G* mutation stained with HS-355. **H)** Images of protein deposits stained with HS-355. **I)** Spectral image and the emission spectrum from HS-355 bound to A $\beta$  deposits (green) or tau aggregates (red). In B, C, E, F, H and I, A $\beta$ -deposits are indicated by white arrows, whereas tau aggregates are indicated by white arrow heads and autofluorescence from granular lipofuscin is indicated by blue arrow heads. Scale bars represent 1 mm (A, D and G) and 20  $\mu$ m (B, C, E, F, H and I).

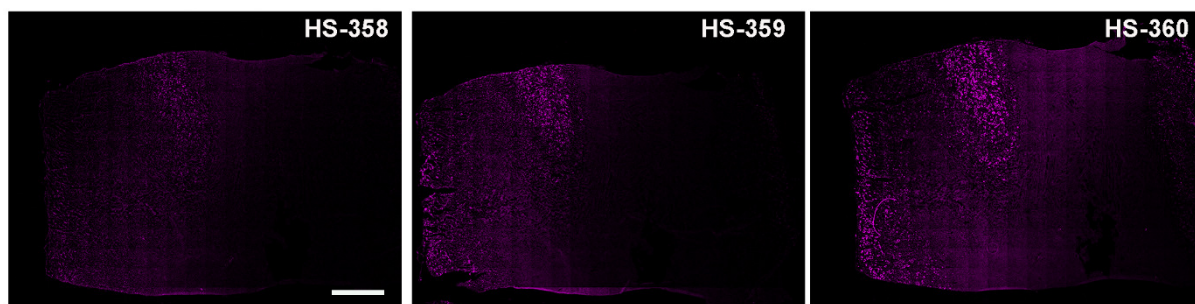

**Figure S11.** Overview tile fluorescence images of brain tissue sections from a case of diAD associated with the Arctic *APP* E693G mutation stained with the ligands HS-358, HS-359 or HS-360. The fluorescence from the ligand is shown in magenta. Scale bar represents 2 mm.

**Table S1.** Absorption- and emission maximum for TVB based ligands in PBS.

| Ligand | Abs <sub>max</sub> (nm) | Em <sub>max</sub> (nm) |
|--------|-------------------------|------------------------|
| HS-350 | 422                     | 560                    |
| HS-351 | 448                     | 575                    |
| HS-352 | 437                     | 575                    |
| HS-353 | 462                     | 581                    |
| HS-354 | 438                     | 599                    |
| HS-355 | 455                     | 583                    |
| HS-356 | 465                     | 600                    |
| HS-357 | 462                     | 594                    |
| HS-358 | 465                     | 660                    |
| HS-359 | 452                     | 631                    |
| HS-360 | 465                     | 648                    |

**Table S2. List of the human brain tissue sections used in the study.**

| <b>Case no</b> | <b>Pathology</b> | <b>Brain area</b> | <b>Sex</b> | <b>Age</b> | <b>APOE</b> |
|----------------|------------------|-------------------|------------|------------|-------------|
| 1              | sAD              | Frontal ctx       | F          | 82         | 4/4         |
| 2              | <i>APP E693E</i> | Frontal ctx       | Male       | 64         | 3/3         |

## Experimental details

### General information:

TLC was performed using 0.25 mm precoated silica-gel plates (Merck 60 F254), detection by UV-abs at 254 nm.  $^1\text{H}$  (500 MHz) and  $^{13}\text{C}$ -NMR (126 MHz) spectra were recorded on a Bruker NMR instrument (25 °C in  $\text{CDCl}_3$  or DMSO- $d_6$  or acetone- $d_6$ ). HPLC-MS was performed on a Waters system (Column: XSELECT Phenyl-Hexyl, 5  $\mu\text{m}$ , 250 x 19 mm and Waters X-Bridge C-18 3.5  $\mu\text{m}$ , 50 x 4.6 mm for preparative and analytical experiments respectively; Mobile phase: organic phase: acetonitrile:water 90:10, with 10 mM  $\text{NH}_4\text{OAc}$ ; water phase: acetonitrile:water 5:95, with 10 mM  $\text{NH}_4\text{OAc}$ ). Flash chromatography was performed using the following silica gel: High purity grade (Merck Grade 9385), pore size 60 Å, 230-240 mesh particle size. Some synthesized starting materials of **3a-h** or **7b-d** contained trace amount of solvent or other impurities which were not needed for further purification. High resolution MS was measured using Agilent Technologies 6550 i Funnel LC-QTOF-MS.

### Compound synthesis:

#### General procedure A: Synthesis of **3a-h**.

The mixture of **1** (2 mmol), **2a-g** (2 mmol),  $\text{CuI}$  (0.4 mmol),  $\text{Cs}_2\text{CO}_3$  (4 mmol) and DMF (10.0 mL) in a 10-20 mL microwave vial was flushed with  $\text{N}_2$  gas for about 1 minute, then the vial was sealed and irradiated under microwave for 25 minutes at 170 °C. The reaction mixture was purified using silica gel column chromatography with ethyl acetate-*n*-heptane (EtOAc-*n*-heptane) or preparative HPLC with B:A to give the product **3a-h**.

#### General procedure B: Synthesis of **HS-350** to **HS-360**.

The mixture of **3a-h** or **7b-d** (0.0438-0.132 mmol), **4** (1.0 equivalent) and pyridine (6.0 equivalents) in dry MeOH (1 mL) was stirred at 65 °C overnight. The reaction mixture was filtered and the solid was washed with a few drops of MeOH, acetonitrile and DCM to give **HS-350** to **HS-360** respectively.

#### General procedure C: Synthesis of **7a** and **7c-d**.

The mixture of boronic acid **5** (2.0 equivalents), **6a** or **6c-d** (0.4 mmol), PEPPSI<sup>TM</sup>-IPr (0.05 equivalent) and  $\text{K}_2\text{CO}_3$  (4.0 equivalents) in dioxan/MeOH (3:2, 5mL) was flushed with  $\text{N}_2$  gas for about 30 seconds. The vial was sealed, and the reaction mixture was heated at 70 °C for about 5 hours. The reaction mixture was carefully transferred to a round bottom flask and concentrated to give the crude product. The crude **7a** was purified using silica gel column chromatography with EtOAc-*n*-heptane (25:75 to 60:40) to give the product **7a** (95 mg, 96% yield). The crude **7c** or **7d** was mixed with MeOH (about 3-4 mL), filtered, and washed with water (10 mL) and a few drops of methanol to give a pure product, which was used for the condensation reaction without necessity for further purification.

#### Synthesis of **3a**

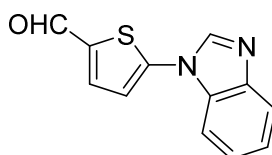

The compound was synthesized according to the general procedure A in 34% yield (155 mg), which was purified using EtOAc-*n*-heptane (50:50 to 70:30).  $^1\text{H}$ -NMR ( $\text{CDCl}_3$ , 500 MHz):  $\delta$  9.93 (s, 1H), 8.16 (s, 1H), 7.87 (dd,  $J$  = 7.0, 1.5 Hz, 1H), 7.79 (d,  $J$  = 4.0 Hz, 1H), 7.71 (dd,  $J$  = 7.5,

1.5 Hz, 1H), 7.44-7.37 (m, 2H), 7.28 (d,  $J = 4.0$  Hz, 1H).  $^{13}\text{C-NMR}$  ( $\text{CDCl}_3$ , 126 MHz):  $\delta$  182.8, 146.4, 144.2, 142.1, 139.6, 136.1, 133.3, 125.0, 124.1, 121.2, 120.0, 110.8. LCMS (ESI<sup>+</sup>):  $m/z$  calcd for  $\text{C}_{12}\text{H}_9\text{N}_2\text{OS}$  (M+H)<sup>+</sup>: 229.0. Found: 229.5.

### Synthesis of **3b**

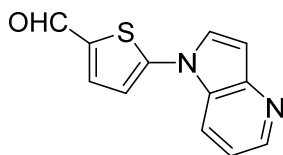

The compound was synthesized according to the general procedure A in 17% yield (78 mg), which was purified using EtOAc-n-heptane (30:70 to 70:30).  $^1\text{H-NMR}$  ( $\text{CDCl}_3$ , 500 MHz):  $\delta$  9.85 (s, 1H), 8.54 (dd,  $J = 4.5, 1.0$  Hz, 1H), 8.03 (d,  $J = 8.0$  Hz, 1H), 7.73 (d,  $J = 4.0$  Hz, 1H), 7.59 (d,  $J = 3.5$  Hz, 1H), 7.22 (dd,  $J = 8.5, 4.5$  Hz, 1H), 7.14 (d,  $J = 4.0$  Hz, 1H), 6.92 (d,  $J = 3.5$  Hz, 1H).  $^{13}\text{C-NMR}$  ( $\text{CDCl}_3$ , 126 MHz):  $\delta$  182.6, 150.2, 148.2, 145.2, 137.7, 136.5, 131.0, 129.0, 118.4, 118.1, 107.7. LCMS (ESI<sup>+</sup>):  $m/z$  calcd for  $\text{C}_{12}\text{H}_9\text{N}_2\text{OS}$  (M+H)<sup>+</sup>: 229.0. Found: 229.3.

### Synthesis of **3c**

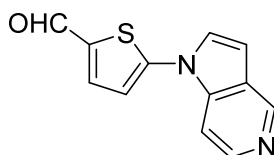

The compound was synthesized according to the general procedure A in 4% yield (42 mg), which was purified using EtOAc-n-heptane (50:50 to 80:20).  $^1\text{H-NMR}$  ( $\text{CDCl}_3$ , 500 MHz):  $\delta$  9.89 (s, 1H), 8.98 (s, 1H), 8.47 (d,  $J = 6.0$  Hz, 1H), 7.76 (d,  $J = 4.0$  Hz, 1H), 7.65 (d,  $J = 6.0$  Hz, 1H), 7.40 (d,  $J = 3.5$  Hz, 1H), 7.20 (d,  $J = 4.0$  Hz, 1H), 6.84 (dd,  $J = 3.5, 0.5$  Hz, 1H).  $^{13}\text{C-NMR}$  ( $\text{CDCl}_3$ , 126 MHz):  $\delta$  182.7, 149.6, 144.6, 143.3, 139.7, 138.4, 136.4, 129.0, 126.4, 119.0, 106.2, 105.8. LCMS (ESI<sup>+</sup>):  $m/z$  calcd for  $\text{C}_{12}\text{H}_9\text{N}_2\text{OS}$  (M+H)<sup>+</sup>: 229.0. Found: 229.4.

### Synthesis of **3d**

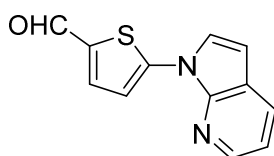

The compound was synthesized according to the general procedure A in 4% yield (19 mg), which was purified using EtOAc-n-heptane (50:50 to 80:20).  $^1\text{H-NMR}$  ( $\text{CDCl}_3$ , 500 MHz):  $\delta$  9.86 (s, 1H), 8.45 (dd,  $J = 4.5, 1.5$  Hz, 1H), 7.95 (dd,  $J = 8.0, 1.0$  Hz, 1H), 7.70 (d,  $J = 4.0$  Hz, 1H), 7.59 (d,  $J = 3.5$  Hz, 1H), 7.50 (d,  $J = 4.0$  Hz, 1H), 7.20 (dd,  $J = 8.0, 5.0$  Hz, 1H), 6.69 (d,  $J = 4.0$  Hz, 1H).  $^{13}\text{C-NMR}$  ( $\text{CDCl}_3$ , 126 MHz):  $\delta$  183.0, 149.3, 147.1, 144.3, 136.4, 136.3, 129.7, 126.3, 122.1, 118.2, 115.2, 104.9. LCMS (ESI<sup>+</sup>):  $m/z$  calcd for  $\text{C}_{12}\text{H}_9\text{N}_2\text{OS}$  (M+H)<sup>+</sup>: 229.0. Found: 229.3.

## Synthesis of **3e** and **3h**

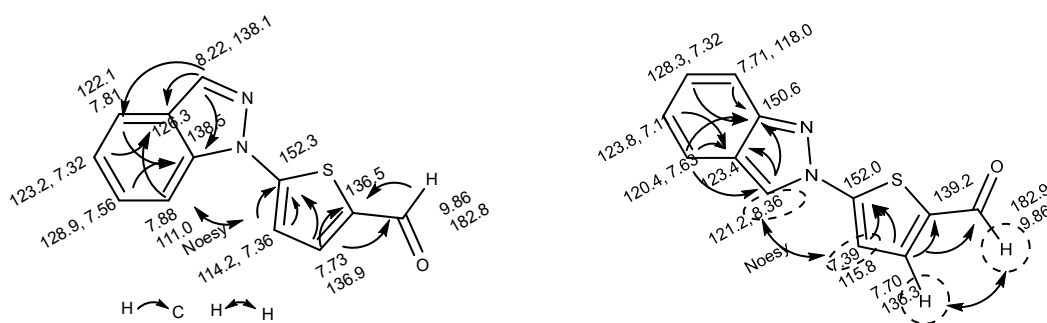

Compound **3e** was synthesized according to the general procedure A in 15% yield (70 mg), which was purified using EtOAc-n-heptane (40:60 to 50:50) and further with preparative liquid chromatography using B:A (20:80 to 100:0). Compound **3h** was also achieved in 6% yield (30 mg) after the purification with preparative LC. The compounds were assigned using 2D-NMR. **3e**:  $^1\text{H-NMR}$  ( $\text{CDCl}_3$ , 500 MHz):  $\delta$  9.86 (s, 1H), 8.22 (s, 1H), 7.88 (d,  $J = 9.0$ , 1H), 7.81 (d,  $J = 8.0$  Hz, 1H), 7.73 (d,  $J = 4.5$  Hz, 1H), 7.56 (dd,  $J = 8.5$ , 7.0 Hz, 1H), 7.36 (d,  $J = 4.5$  Hz, 1H), 7.32 (t,  $J = 7.5$  Hz, 1H).  $^{13}\text{C-NMR}$  ( $\text{CDCl}_3$ , 126 MHz):  $\delta$  182.8, 152.3, 138.5, 138.1, 136.9, 136.5, 128.9, 126.3, 123.2, 122.1, 114.2, 111.0. LCMS (ESI $^+$ ):  $m/z$  calcd for  $\text{C}_{12}\text{H}_9\text{N}_2\text{OS}$  (M+H) $^+$ : 229.0. Found: 229.3.

**3h**:  $^1\text{H-NMR}$  ( $\text{CDCl}_3$ , 500 MHz):  $\delta$  9.86 (s, 1H), 8.36 (s, 1H), 7.71 (d,  $J = 9.0$ , 1H), 7.70 (d,  $J = 4.0$  Hz, 1H), 7.63 (d,  $J = 8.5$  Hz, 1H), 7.39 (d,  $J = 4.0$  Hz, 1H), 7.32 (t,  $J = 8.0$  Hz, 1H), 7.11 (t,  $J = 7.5$  Hz, 1H).  $^{13}\text{C-NMR}$  ( $\text{CDCl}_3$ , 126 MHz):  $\delta$  182.9, 152.0, 150.5, 139.2, 136.3, 128.3, 123.8, 123.4, 121.2, 120.4, 118.0, 115.8. LCMS (ESI $^+$ ):  $m/z$  calcd for  $\text{C}_{12}\text{H}_9\text{N}_2\text{OS}$  (M+H) $^+$ : 229.0. Found: 229.5.

## Synthesis of **3f**:

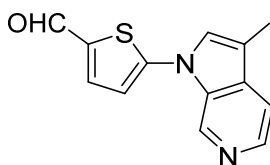

Compound **3f** was synthesized on a 1.89 mmol scale according to the general procedure A in 12% yield (56 mg), which was purified using EtOAc-n-heptane (50:50 to 80:20) and further with preparative liquid chromatography using B:A (20:80 to 100:0).  $^1\text{H-NMR}$  ( $\text{CDCl}_3$ , 500 MHz):  $\delta$  9.85 (s, 1H), 9.11 (br s, 1H), 8.40 (d,  $J = 5.0$  Hz, 1H), 7.73 (d,  $J = 4.0$  Hz, 1H), 7.51 (d,  $J = 5.5$  Hz, 1H), 7.27 (br d,  $J = 1.0$  Hz, 1H), 7.17 (t,  $J = 4.5$  Hz, 1H), 2.34 (d,  $J = 1.0$  Hz, 3H).  $^{13}\text{C-NMR}$  ( $\text{CDCl}_3$ , 126 MHz):  $\delta$  182.6, 150.3, 140.8, 137.2, 136.8, 135.9, 133.7, 133.0, 128.6, 117.5, 115.7, 114.2, 9.3. LCMS (ESI $^+$ ):  $m/z$  calcd for  $\text{C}_{13}\text{H}_{11}\text{N}_2\text{OS}$  (M+H) $^+$ : 243.1. Found: 243.4.



### Synthesis of **3g**:

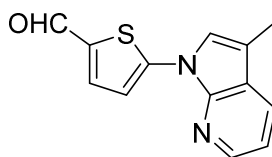

Compound **3g** was synthesized in 15% yield (73 mg) according to the general procedure A, which was purified using EtOAc-n-heptane (50:50 to 80:20) and further with preparative liquid chromatography using B:A (20:80 to 100:0). <sup>1</sup>H-NMR (CDCl<sub>3</sub>, 500 MHz): δ 9.83 (s, 1H), 8.42 (dd, *J* = 5.0, 1.5 Hz, 1H), 7.87 (dd, *J* = 7.5, 1.5 Hz, 1H), 7.67 (d, *J* = 4.0 Hz, 1H), 7.44 (d, *J* = 4.5 Hz, 1H), 7.34 (br d, *J* = 1.0 Hz, 1H), 7.18 (dd, *J* = 7.5, 5.0 Hz, 1H), 2.32 (d, *J* = 1.0 Hz, 3H). <sup>13</sup>C-NMR (CDCl<sub>3</sub>, 126 MHz): δ 182.9, 149.6, 147.3, 144.1, 136.6, 135.5, 129.6, 127.9, 125.7, 123.4, 123.1, 117.6, 114.7, 114.2, 9.8. LCMS (ESI<sup>+</sup>): *m/z* calcd for C<sub>13</sub>H<sub>11</sub>N<sub>2</sub>OS (M+H)<sup>+</sup>: 243.1. Found: 243.2.

### Synthesis of **7b**:

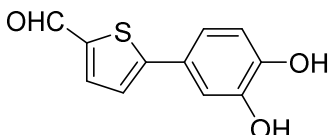

To the solution of **7a** (95 mg, 0.383 mmol) in dry DCM (8 mL) was added 1.0 M BBr<sub>3</sub> in hexane (2.3 mL, 2.30 mmol). The resulting mixture was stirred at rt for 3.5 hours. The reaction mixture was quenched with water/acetonitrile (5mL/5mL), another 15 mL water was added, and the mixture was extracted with EtOAc (15 mL x 3). The organic layers were combined, dried over MgSO<sub>4</sub>, filtered, and concentrated to give the crude **7b**. DCM (1 mL x 2) was added to rinse the crude product, giving **7b** (35.1 mg, 42%), which was used without further purification for the next step. <sup>1</sup>H-NMR (acetone-d<sub>6</sub>, 500 MHz): δ 9.88 (s, 1H), 7.88 (d, *J* = 4.0 Hz, 1H), 7.44 (d, *J* = 4.0 Hz, 1H), 7.25 (d, *J* = 2.0 Hz, 1H), 7.17 (dd, *J* = 8.0, 2.0 Hz, 1H), 6.91 (d, *J* = 8.5 Hz, 1H). <sup>13</sup>C-NMR (acetone-d<sub>6</sub>, 126 MHz): δ 183.5, 155.1, 147.9, 146.6, 142.2, 139.3, 126.0, 124.0, 119.4, 116.8, 114.1. LCMS (ESI<sup>+</sup>): *m/z* calcd for C<sub>11</sub>H<sub>9</sub>O<sub>3</sub>S (M+H)<sup>+</sup>: 221.0. Found: 221.3.

### Synthesis of **7c**:

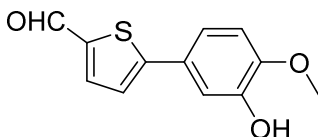

Compound **7c** was synthesized according to the general procedure C in 41% yield (39 mg). <sup>1</sup>H-NMR (DMSO-d<sub>6</sub>, 500 MHz): δ 9.86 (s, 1H), 7.98 (d, *J* = 3.5 Hz, 1H), 7.55 (d, *J* = 4.0 Hz, 1H), 7.23 (dd, *J* = 8.5, 2.0 Hz, 1H), 7.22 (d, *J* = 2.5 Hz, 1H), 7.01 (d, *J* = 8.5 Hz, 1H), 3.82 (s, 3H). <sup>13</sup>C-NMR (DMSO-d<sub>6</sub>, 126 MHz): δ 183.7, 153.4, 149.3, 147.2, 140.8, 139.5, 125.3, 123.9, 117.6, 113.2, 112.6, 55.7. LCMS (ESI<sup>+</sup>): *m/z* calcd for C<sub>12</sub>H<sub>11</sub>O<sub>3</sub>S (M+H)<sup>+</sup>: 235.0. Found: 235.4.

Synthesis of **7d**:

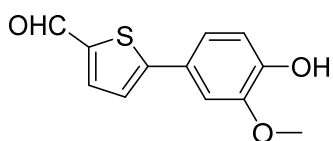

Compound **7d** was synthesized according to the general procedure C in 85% yield (80 mg). <sup>1</sup>H-NMR (DMSO-d<sub>6</sub>, 500 MHz): δ 9.67 (s, 1H), 7.81 (d, *J* = 4.0 Hz, 1H), 7.25 (d, *J* = 4.0 Hz, 1H), 7.08 (dd, *J* = 8.5, 1.5 Hz, 1H), 6.97 (s, 1H), 6.32 (d, *J* = 8.5 Hz, 1H), 3.70 (s, 3H). <sup>13</sup>C-NMR (DMSO-d<sub>6</sub>, 126 MHz): δ 181.7, 157.7, 150.6, 140.1, 136.2, 121.7, 119.4, 117.9, 110.0, 55.4. LCMS (ESI<sup>+</sup>): *m/z* calcd for C<sub>12</sub>H<sub>11</sub>O<sub>3</sub>S (M+H)<sup>+</sup>: 235.0. Found: 235.3.

Synthesis of **HS-350**:

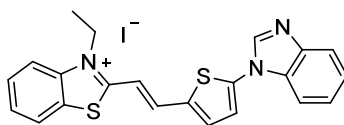

Following the general procedure B, ligand **HS-350** was synthesized in 71% yield (39 mg) on 0.107 mmol scale. <sup>1</sup>H-NMR (DMSO-d<sub>6</sub>, 500 MHz): δ 8.80 (s, 1H), 8.54 (d, *J* = 15.0 Hz, 1H), 8.45 (d, *J* = 8.0 Hz, 1H), 8.29 (d, *J* = 8.5 Hz, 1H), 8.06 (d, *J* = 4.5 Hz, 1H), 7.91 (d, *J* = 8.0 Hz, 1H), 7.88 (t, *J* = 8.0 Hz, 1H), 7.85 (d, *J* = 8.0 Hz, 1H), 7.79 (t, *J* = 7.5 Hz, 1H), 7.78 (d, *J* = 15.0 Hz, 1H), 7.72 (d, *J* = 4.0 Hz, 1H), 7.49 (t, *J* = 8.0 Hz, 1H), 7.42 (t, *J* = 7.5 Hz, 1H), 4.95 (q, *J* = 7.0 Hz, 2H), 1.48 (t, *J* = 7.0 Hz, 3H). <sup>13</sup>C-NMR (DMSO-d<sub>6</sub>, 126 MHz): δ 170.8, 143.7, 143.5, 143.4, 141.3, 140.9, 135.5, 134.6, 132.6, 129.6, 128.4, 128.2, 124.6, 123.5, 123.7, 121.2, 120.5, 116.6, 111.2, 111.0, 44.4, 14.2. HRMS (ESI<sup>+</sup>): *m/z* calcd for C<sub>22</sub>H<sub>18</sub>N<sub>3</sub>S<sub>2</sub><sup>+</sup> (M-I)<sup>+</sup>: 388.0942. Found: 388.0946.

Synthesis of **HS-351**:

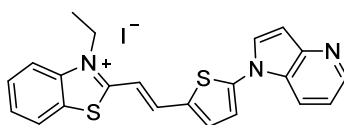

Following the general procedure B, ligand **HS-351** was synthesized in 73% yield (46.2 mg) on 0.123 mmol scale. <sup>1</sup>H-NMR (DMSO-d<sub>6</sub>, 500 MHz): δ 8.55 (dd, *J* = 5.0, 1.0 Hz, 1H), 8.52 (d, *J* = 15.5 Hz, 1H), 8.43 (d, *J* = 8.0 Hz, 1H), 8.31 (d, *J* = 8.5 Hz, 1H), 8.27 (d, *J* = 8.5 Hz, 1H), 8.20 (d, *J* = 8.5 Hz, 1H), 8.04 (d, *J* = 4.0 Hz, 1H), 7.87 (dt, *J* = 8.0, 0.5 Hz, 1H), 7.78 (t, *J* = 8.0 Hz, 1H), 7.70 (d, *J* = 15.0 Hz, 1H), 7.63 (d, *J* = 4.5 Hz, 1H), 7.40 (dd, *J* = 8.5, 4.5 Hz, 1H), 7.01 (d, *J* = 3.5 Hz, 1H), 4.93 (q, *J* = 7.0 Hz, 2H), 1.47 (t, *J* = 7.0 Hz, 3H). <sup>13</sup>C-NMR (DMSO-d<sub>6</sub>, 126 MHz): δ 170.8, 147.7, 147.3, 144.9, 141.6, 140.9, 136.3, 133.1, 132.1, 129.5, 128.2, 128.16, 128.1, 124.4, 119.4, 118.6, 118.4, 116.4, 110.2, 107.0, 44.3, 14.2. HRMS (ESI<sup>+</sup>): *m/z* calcd for C<sub>22</sub>H<sub>18</sub>N<sub>3</sub>S<sub>2</sub><sup>+</sup> (M-I)<sup>+</sup>: 388.0942. Found: 388.0941.

### Synthesis of **HS-352**:

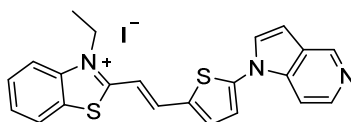

Following the general procedure B, ligand **HS-352** was synthesized in 59% yield (13.3 mg) on 0.0438 mmol scale.  $^1\text{H-NMR}$  (DMSO- $d_6$ , 500 MHz):  $\delta$  9.02 (br s, 1H), 8.52 (d,  $J = 15.5$  Hz, 1H), 8.48 (br d,  $J = 5.5$  Hz, 1H), 8.43 (d,  $J = 8.0$  Hz, 1H), 8.28 (d,  $J = 8.5$  Hz, 1H), 8.04 (d,  $J = 4.0$  Hz, 1H), 8.00 (d,  $J = 3.5$  Hz, 1H), 7.91 (d,  $J = 5.5$  Hz, 1H), 7.87 (t,  $J = 7.5$  Hz, 1H), 7.78 (t,  $J = 7.5$  Hz, 1H), 7.73 (d,  $J = 15.5$  Hz, 1H), 7.65 (d,  $J = 4.5$  Hz, 1H), 7.01 (d,  $J = 3.0$  Hz, 1H), 4.94 (q,  $J = 7.0$  Hz, 2H), 1.48 (t,  $J = 7.0$  Hz, 3H).  $^{13}\text{C-NMR}$  (DMSO- $d_6$ , 126 MHz):  $\delta$  170.8, 146.5, 143.9, 142.6, 141.5, 140.9, 138.8, 136.0, 133.7, 130.1, 129.5, 128.3, 128.1, 126.0, 124.4, 120.2, 116.5, 110.5, 106.5, 106.5, 105.6, 44.4, 14.2. HRMS (ESI $^+$ ):  $m/z$  calcd for  $\text{C}_{22}\text{H}_{18}\text{N}_3\text{S}_2^+$  (M-I) $^+$ : 388.0942. Found: 388.0941.

### Synthesis of **HS-353**:

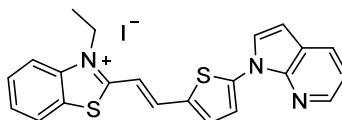

Following the general procedure B, ligand **HS-353** was synthesized in 73% yield (18.2 mg) on 0.0482 mmol scale.  $^1\text{H-NMR}$  (DMSO- $d_6$ , 500 MHz):  $\delta$  8.50 (dd,  $J = 5.0, 1.0$  Hz, 1H), 8.49 (d,  $J = 15.5$  Hz, 1H), 8.39 (d,  $J = 8.0$  Hz, 1H), 8.35 (d,  $J = 4.0$  Hz, 1H), 8.23 (d,  $J = 8.5$  Hz, 1H), 8.19 (dd,  $J = 8.0, 1.5$  Hz, 1H), 8.02 (d,  $J = 4.0$  Hz, 1H), 7.85 (dt,  $J = 8.0, 1.0$  Hz, 1H), 7.72-7.72 (m, 2H), 7.69 (d,  $J = 15.5$  Hz, 1H), 7.38 (dd,  $J = 8.0, 5.0$  Hz, 1H), 6.95 (d,  $J = 4.0$  Hz, 1H), 4.93 (q,  $J = 7.0$  Hz, 2H), 1.48 (t,  $J = 7.0$  Hz, 3H).  $^{13}\text{C-NMR}$  (DMSO- $d_6$ , 126 MHz):  $\delta$  170.9, 146.5, 145.8, 143.7, 142.7, 140.9, 135.9, 132.5, 130.3, 129.3, 128.0, 127.8, 127.3, 124.2, 121.8, 118.4, 116.2, 115.8, 108.5, 105.2, 44.0, 14.1. HRMS (ESI $^+$ ):  $m/z$  calcd for  $\text{C}_{22}\text{H}_{18}\text{N}_3\text{S}_2^+$  (M-I) $^+$ : 388.0942. Found: 388.0941.

### Synthesis of **HS-354**:

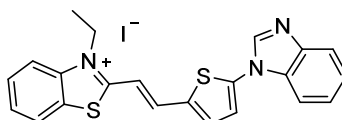

Following the general procedure B, ligand **HS-354** was synthesized in 52% yield (27 mg) on 0.0876 mmol scale.  $^1\text{H-NMR}$  (DMSO- $d_6$ , 500 MHz):  $\delta$  8.57 (s, 1H), 8.48 (d,  $J = 15.5$  Hz, 1H), 8.40 (d,  $J = 8.0$  Hz, 1H), 8.25 (d,  $J = 8.5$  Hz, 1H), 8.20 (d,  $J = 8.5$  Hz, 1H), 8.01 (d,  $J = 4.5$  Hz, 1H), 7.98 (d,  $J = 8.0$  Hz, 1H), 7.85 (dt,  $J = 8.0, 0.5$  Hz, 1H), 7.76 (t,  $J = 7.5$  Hz, 1H), 7.74 (d,  $J = 4.0$  Hz, 1H), 7.69 (dt,  $J = 8.0, 0.5$  Hz, 1H), 7.66 (d,  $J = 15.5$  Hz, 1H), 7.42 (t,  $J = 7.5$  Hz, 1H), 4.92 (q,  $J = 7.0$  Hz, 2H), 1.47 (t,  $J = 7.0$  Hz, 3H).  $^{13}\text{C-NMR}$  (DMSO- $d_6$ , 126 MHz):  $\delta$  170.7, 149.8, 142.0, 140.9, 138.8, 137.8, 137.5, 132.1, 129.4, 129.2, 128.1, 128.0, 126.0, 124.3, 123.4, 122.4, 116.3, 114.5, 111.5, 109.6, 44.2, 14.1. HRMS (ESI $^+$ ):  $m/z$  calcd for  $\text{C}_{22}\text{H}_{18}\text{N}_3\text{S}_2^+$  (M-I) $^+$ : 388.0942. Found: 388.0938.

### Synthesis of **HS-355**:

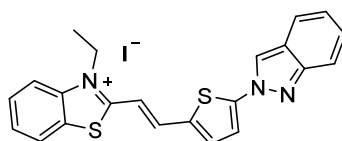

Following the general procedure B, ligand **HS-355** was synthesized in 65% yield (25 mg) on 0.0745 mmol scale.  $^1\text{H-NMR}$  (DMSO- $d_6$ , 500 MHz):  $\delta$  9.23 (s, 1H), 8.49 (d,  $J$  = 15.5 Hz, 1H), 8.44 (d,  $J$  = 8.0 Hz, 1H), 8.29 (d,  $J$  = 8.5 Hz, 1H), 7.98 (d,  $J$  = 4.0 Hz, 1H), 7.91 (d,  $J$  = 4.0 Hz, 1H), 7.88 (t,  $J$  = 7.5 Hz, 1H), 7.83-7.75 (m, 3H), 7.68 (d,  $J$  = 8.5 Hz, 1H), 7.39 (t,  $J$  = 7.5 Hz, 1H), 7.17 (t,  $J$  = 7.5 Hz, 1H), 4.95 (q,  $J$  = 7.0 Hz, 2H), 1.49 (t,  $J$  = 7.0 Hz, 3H).  $^{13}\text{C-NMR}$  (DMSO- $d_6$ , 126 MHz):  $\delta$  170.7, 149.4, 149.0, 141.5, 140.9, 136.1, 135.2, 129.5, 128.3, 128.23, 128.19, 124.4, 123.2, 129.0, 122.7, 121.0, 117.1, 117.0, 116.5, 110.1, 44.4, 14.1. HRMS (ESI $^+$ ):  $m/z$  calcd for  $\text{C}_{22}\text{H}_{18}\text{N}_3\text{S}_2^+$  (M-I) $^+$ : 388.0942. Found: 388.0938.

### Synthesis of **HS-356**:

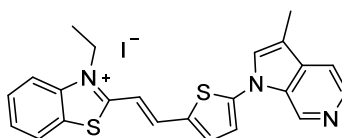

Following the general procedure B, ligand **HS-356** was synthesized in 68% yield (34 mg) on 0.0949 mmol scale.  $^1\text{H-NMR}$  (DMSO- $d_6$ , 500 MHz):  $\delta$  9.28 (br s, 1H), 8.51 (d,  $J$  = 15.0 Hz, 1H), 8.44-8.38 (m, 2H), 8.26 (d,  $J$  = 8.5 Hz, 1H), 8.01 (d,  $J$  = 4.0 Hz, 1H), 7.94 (s, 1H), 7.86 (t,  $J$  = 7.5 Hz, 1H), 7.77 (t,  $J$  = 7.5 Hz, 1H), 7.72 (d,  $J$  = 5.5 Hz, 1H), 7.67 (d,  $J$  = 15.0 Hz, 1H), 7.62 (d,  $J$  = 4.0 Hz, 1H), 4.93 (q,  $J$  = 7.0 Hz, 2H), 2.35 (s, 3H), 1.48 (t,  $J$  = 7.0 Hz, 3H).  $^{13}\text{C-NMR}$  (DMSO- $d_6$ , 126 MHz):  $\delta$  170.7, 147.6, 141.7, 140.9, 140.8, 136.6, 135.2, 133.5, 132.4, 132.1, 129.4, 129.1, 128.2, 128.0, 124.4, 118.5, 116.4, 115.1, 114.3, 109.7, 44.2, 14.1, 8.9. HRMS (ESI $^+$ ):  $m/z$  calcd for  $\text{C}_{23}\text{H}_{20}\text{N}_3\text{S}_2^+$  (M-I) $^+$ : 402.1099. Found: 402.1099.

### Synthesis of **HS-357**:

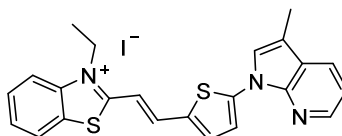

Following the general procedure B, ligand **HS-357** was synthesized in 68% yield (34 mg) on 0.0949 mmol scale.  $^1\text{H-NMR}$  (DMSO- $d_6$ , 500 MHz):  $\delta$  8.51-8.44 (m, 2H), 8.37 (d,  $J$  = 7.5 Hz, 1H), 8.21 (d,  $J$  = 8.5 Hz, 1H), 8.16 (dd,  $J$  = 8.0, 1.5 Hz, 1H), 8.13 (d,  $J$  = 0.5 Hz, 1H), 7.99 (d,  $J$  = 4.5 Hz, 1H), 7.82 (dt,  $J$  = 8.0, 1.0 Hz, 1H), 7.73 (t,  $J$  = 7.5 Hz, 1H), 7.64 (d,  $J$  = 4.5 Hz, 1H), 7.62 (d,  $J$  = 15.0 Hz, 1H), 7.37 (dd,  $J$  = 7.5, 5.0 Hz, 1H), 4.91 (q,  $J$  = 7.0 Hz, 2H), 2.36 (s, 3H), 1.47 (t,  $J$  = 7.0 Hz, 3H).  $^{13}\text{C-NMR}$  (DMSO- $d_6$ , 126 MHz):  $\delta$  170.8, 146.9, 145.9, 143.8, 142.9, 140.9, 136.4, 132.0, 129.3, 128.6, 127.9, 127.7, 124.2, 124.16, 122.6, 118.0, 116.1, 115.0, 114.6, 107.9, 44.0, 14.1, 9.5. HRMS (ESI $^+$ ):  $m/z$  calcd for  $\text{C}_{23}\text{H}_{20}\text{N}_3\text{S}_2^+$  (M-I) $^+$ : 402.1099. Found: 402.1095.

### Synthesis of **HS-358**:

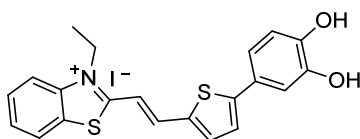

Following the general procedure B, ligand **HS-358** was synthesized in 63% yield (42 mg) on 0.132 mmol scale.  $^1\text{H-NMR}$  (DMSO- $d_6$ , 500 MHz):  $\delta$  9.48 (br s, 2H), 8.43 (d,  $J = 15.5$  Hz, 1H), 8.40 (d,  $J = 8.0$  Hz, 1H), 8.24 (d,  $J = 8.5$  Hz, 1H), 7.94 (d,  $J = 4.0$  Hz, 1H), 7.85 (t,  $J = 8.5$  Hz, 1H), 7.76 (t,  $J = 8.5$  Hz, 1H), 7.59 (d,  $J = 15.5$  Hz, 1H), 7.53 (d,  $J = 4.0$  Hz, 1H), 7.16 (d,  $J = 2.0$  Hz, 1H), 7.14 (dd,  $J = 8.0, 2.0$  Hz, 1H), 6.85 (d,  $J = 8.0$  Hz, 1H), 4.90 (q,  $J = 7.0$  Hz, 2H), 1.46 (t,  $J = 7.0$  Hz, 3H).  $^{13}\text{C-NMR}$  (DMSO- $d_6$ , 126 MHz):  $\delta$  170.7, 153.1, 147.6, 146.0, 141.7, 140.9, 137.9, 136.7, 129.4, 128.1, 127.9, 124.3, 124.2, 124.1, 118.0, 116.3, 113.2, 109.6, 44.1, 14.1. HRMS (ESI $^+$ ):  $m/z$  calcd for  $\text{C}_{21}\text{H}_{18}\text{NO}_2\text{S}_2^+$  (M-I) $^+$ : 380.0779. Found: 380.0775.

### Synthesis of **HS-359**:

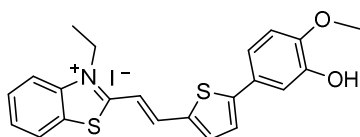

Following the general procedure B, ligand **HS-359** was synthesized in 82% yield (53 mg) on 0.124 mmol scale.  $^1\text{H-NMR}$  (DMSO- $d_6$ , 500 MHz):  $\delta$  9.40 (s, 1H), 8.44 (d,  $J = 15.0$  Hz, 1H), 8.40 (d,  $J = 8.0$  Hz, 1H), 8.25 (d,  $J = 8.5$  Hz, 1H), 7.94 (d,  $J = 4.0$  Hz, 1H), 7.85 (t,  $J = 7.5$  Hz, 1H), 7.76 (t,  $J = 8.0$  Hz, 1H), 7.62 (d,  $J = 15.5$  Hz, 1H), 7.60 (d,  $J = 4.0$  Hz, 1H), 7.25 (dd,  $J = 8.5, 2.0$  Hz, 1H), 7.20 (d,  $J = 2.0$  Hz, 1H), 7.04 (d,  $J = 8.5$  Hz, 1H), 4.90 (q,  $J = 7.0$  Hz, 2H), 3.84 (s, 3H), 1.46 (t,  $J = 7.0$  Hz, 3H).  $^{13}\text{C-NMR}$  (DMSO- $d_6$ , 126 MHz):  $\delta$  170.7, 152.3, 149.3, 147.1, 141.6, 140.9, 137.7, 137.2, 129.4, 128.2, 128.0, 125.5, 124.8, 124.3, 117.6, 116.4, 112.9, 112.7, 110.0, 55.8, 44.2, 14.1. HRMS (ESI $^+$ ):  $m/z$  calcd for  $\text{C}_{22}\text{H}_{20}\text{NO}_2\text{S}_2^+$  (M-I) $^+$ : 394.0935. Found: 394.0934.

### Synthesis of **HS-360**:

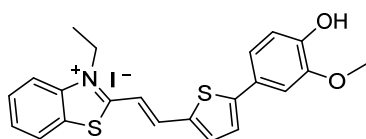

Following the general procedure B, ligand **HS-360** was synthesized in 15% yield (10 mg) on 0.124 mmol scale.  $^1\text{H-NMR}$  (DMSO- $d_6$ , 500 MHz):  $\delta$  9.68 (br s, 1H), 8.44 (d,  $J = 15.5$  Hz, 1H), 8.39 (d,  $J = 8.0$  Hz, 1H), 8.24 (d,  $J = 8.5$  Hz, 1H), 7.95 (d,  $J = 4.0$  Hz, 1H), 7.85 (t,  $J = 7.5$  Hz, 1H), 7.76 (t,  $J = 8.0$  Hz, 1H), 7.67 (d,  $J = 4.0$  Hz, 1H), 7.61 (d,  $J = 15.0$  Hz, 1H), 7.31 (d,  $J = 1.5$  Hz, 1H), 7.26 (dd,  $J = 8.5, 2.0$  Hz, 1H), 6.89 (d,  $J = 8.0$  Hz, 1H), 4.90 (q,  $J = 7.0$  Hz, 2H), 3.87 (s, 3H), 1.46 (t,  $J = 7.0$  Hz, 3H).  $^{13}\text{C-NMR}$  (DMSO- $d_6$ , 126 MHz):  $\delta$  170.7, 153.0, 148.6, 148.2, 141.7, 140.9, 137.9, 136.9, 129.4, 128.1, 128.0, 124.7, 124.3, 124.1, 119.5, 116.3, 116.2, 109.9, 109.7, 55.8, 44.1, 14.1. HRMS (ESI $^+$ ):  $m/z$  calcd for  $\text{C}_{22}\text{H}_{20}\text{NO}_2\text{S}_2^+$  (M-I) $^+$ : 394.0935. Found: 394.0933.

$^1\text{H}$  and  $^{13}\text{C}$ -NMR of **3a**:

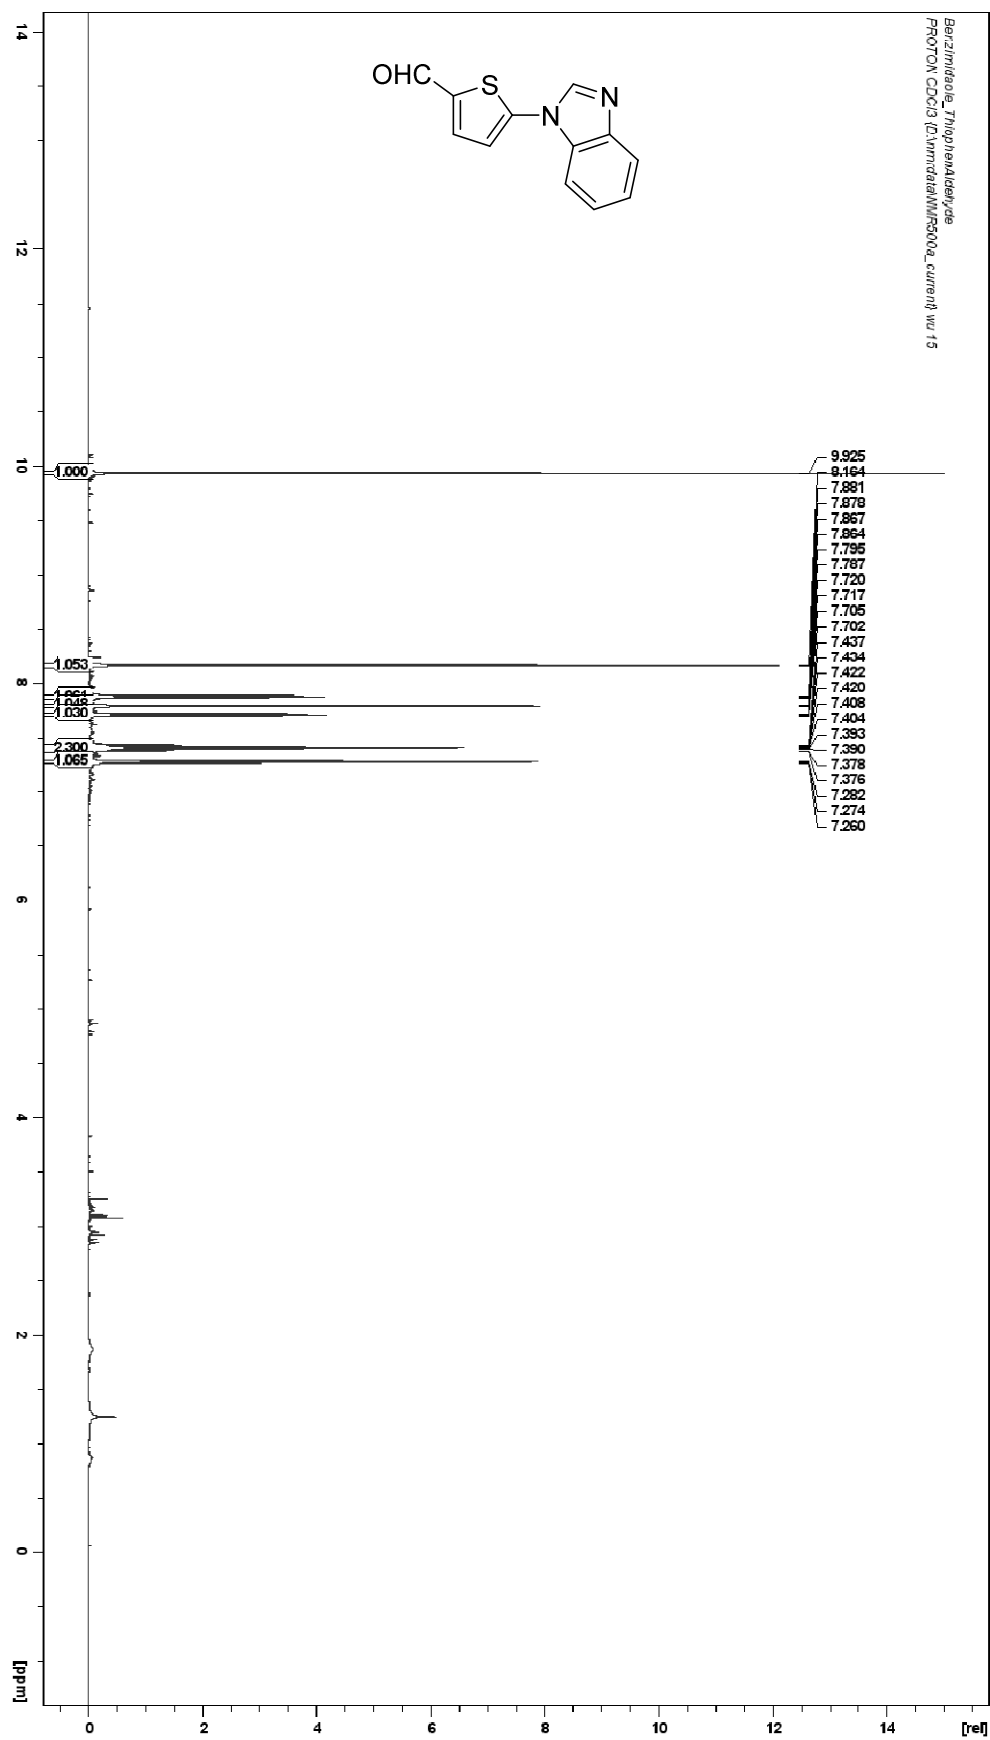

Benzimidazole, Thiophenylaldehyde  
C<sub>13</sub>H<sub>9</sub>N<sub>2</sub>S  
CDCl<sub>3</sub> (DMSO-d<sub>6</sub>/R3009, current) v.v. 1:5

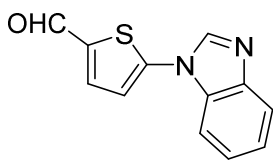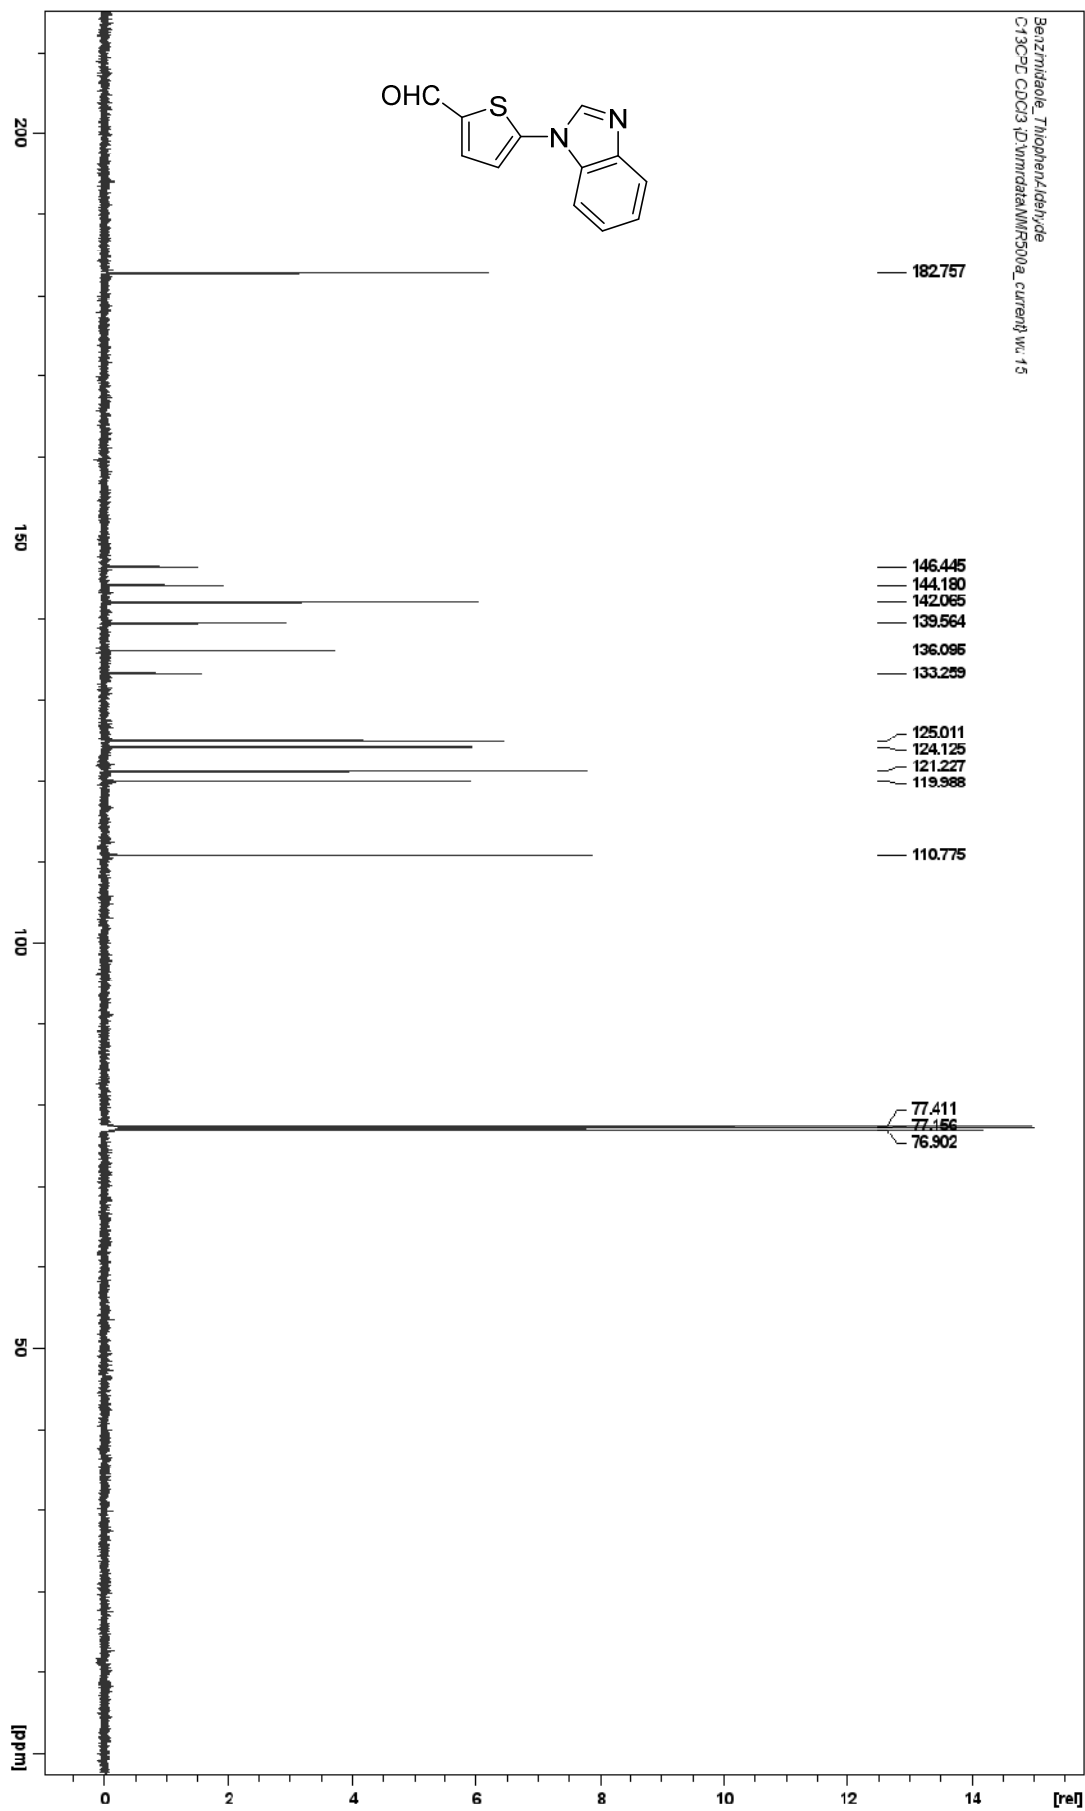

$^1\text{H}$  and  $^{13}\text{C}$ -NMR of **3b**:

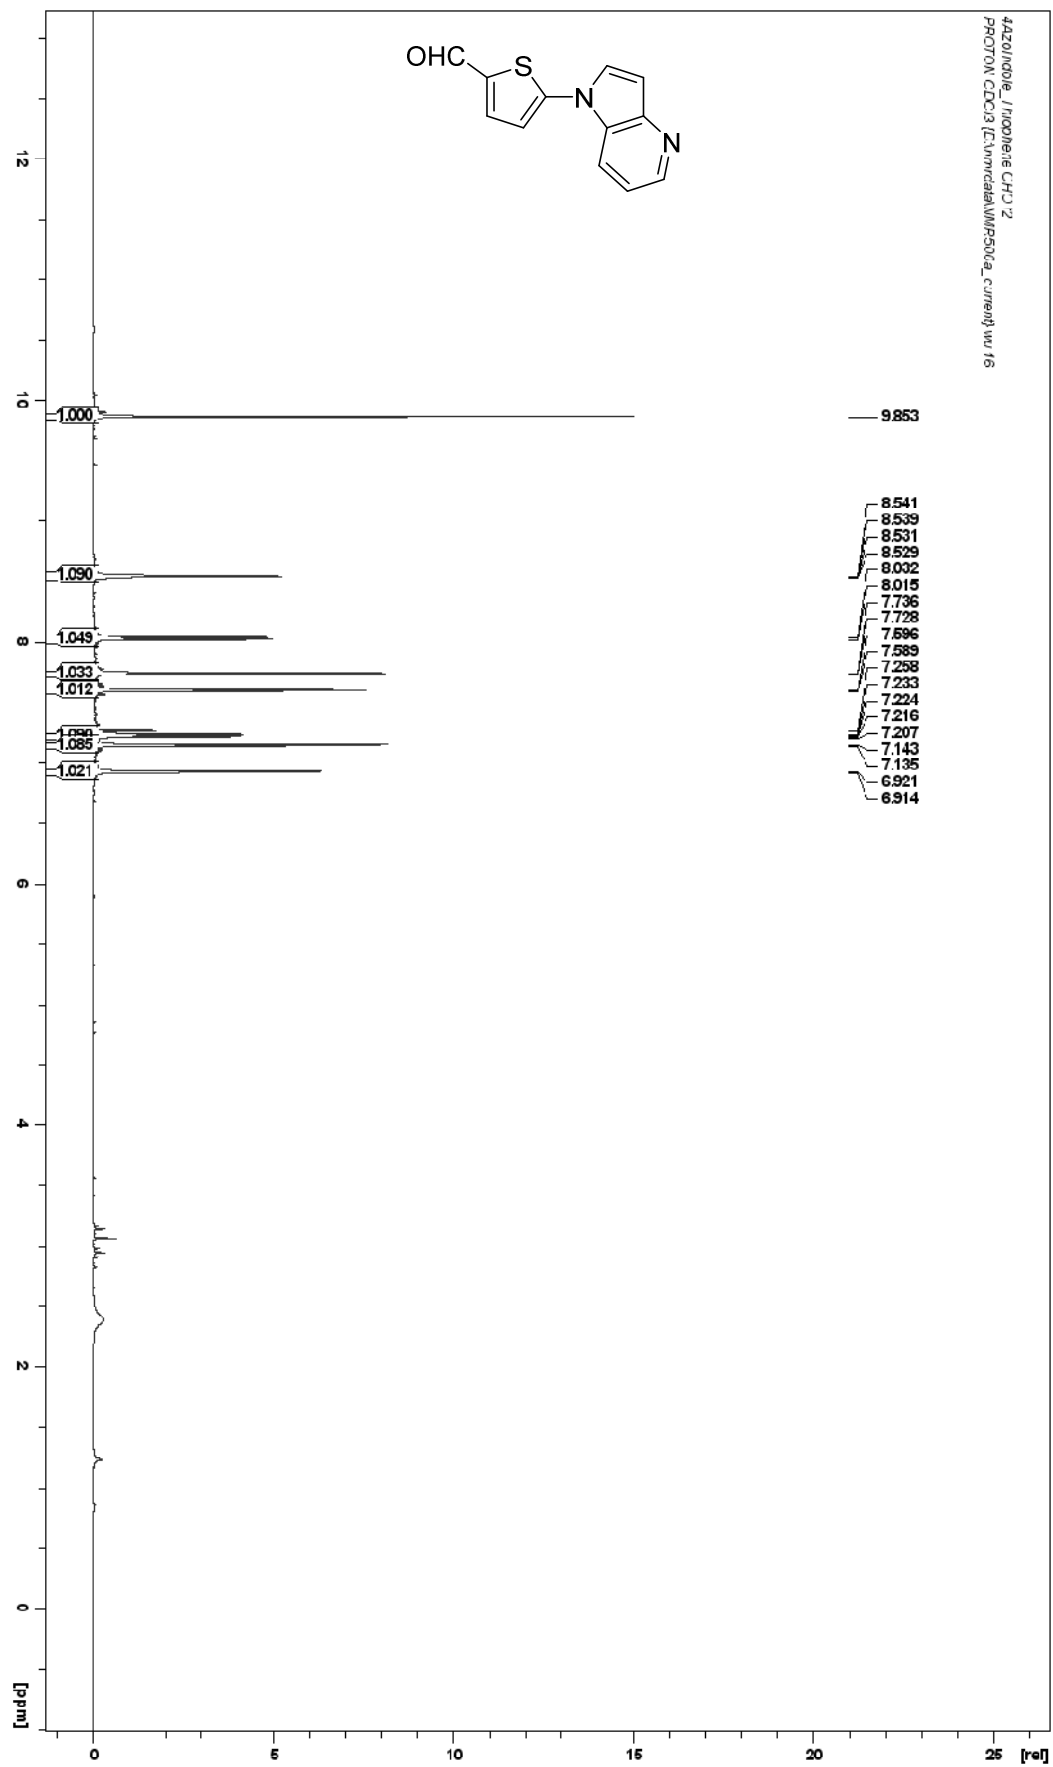



444010616\_Thiopylene CHO 2  
C130FD CDD03 (D:\mrdelam\1300g\_current\ wu 16

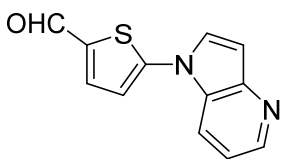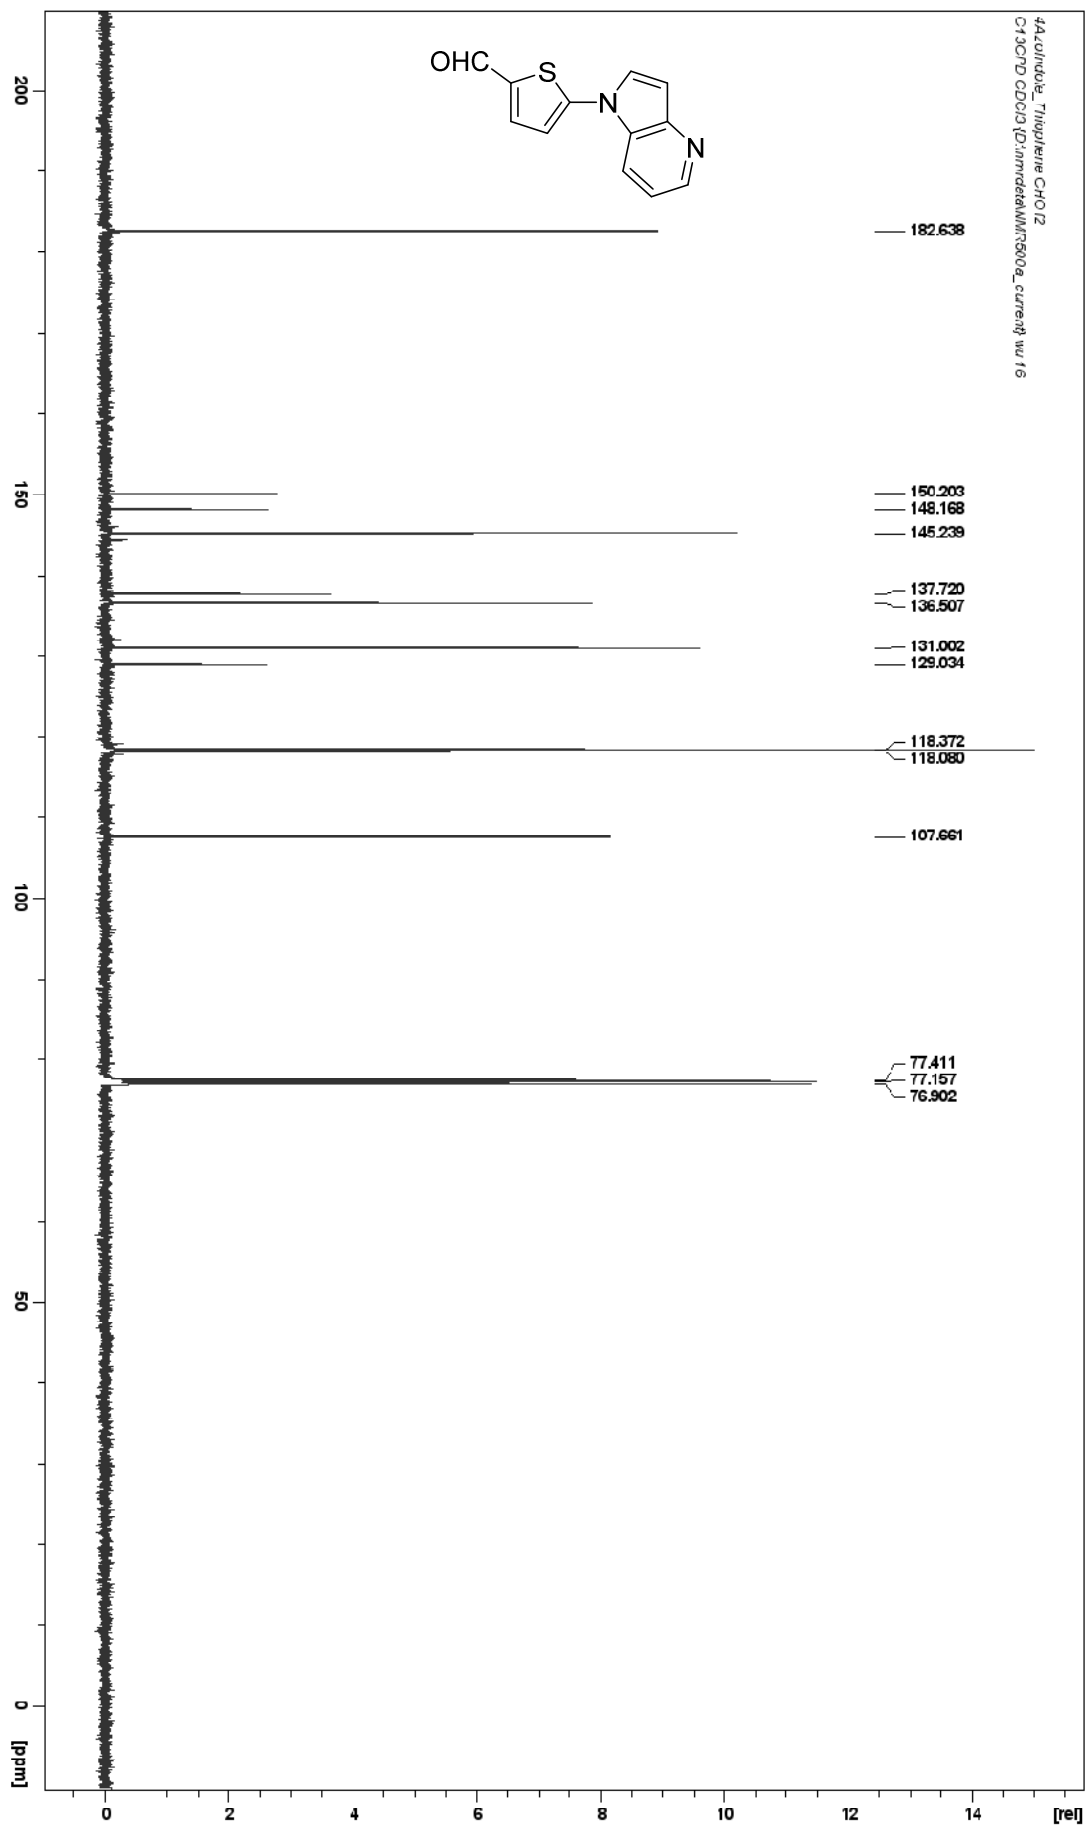

$^1\text{H}$  and  $^{13}\text{C}$ -NMR of **3c**:

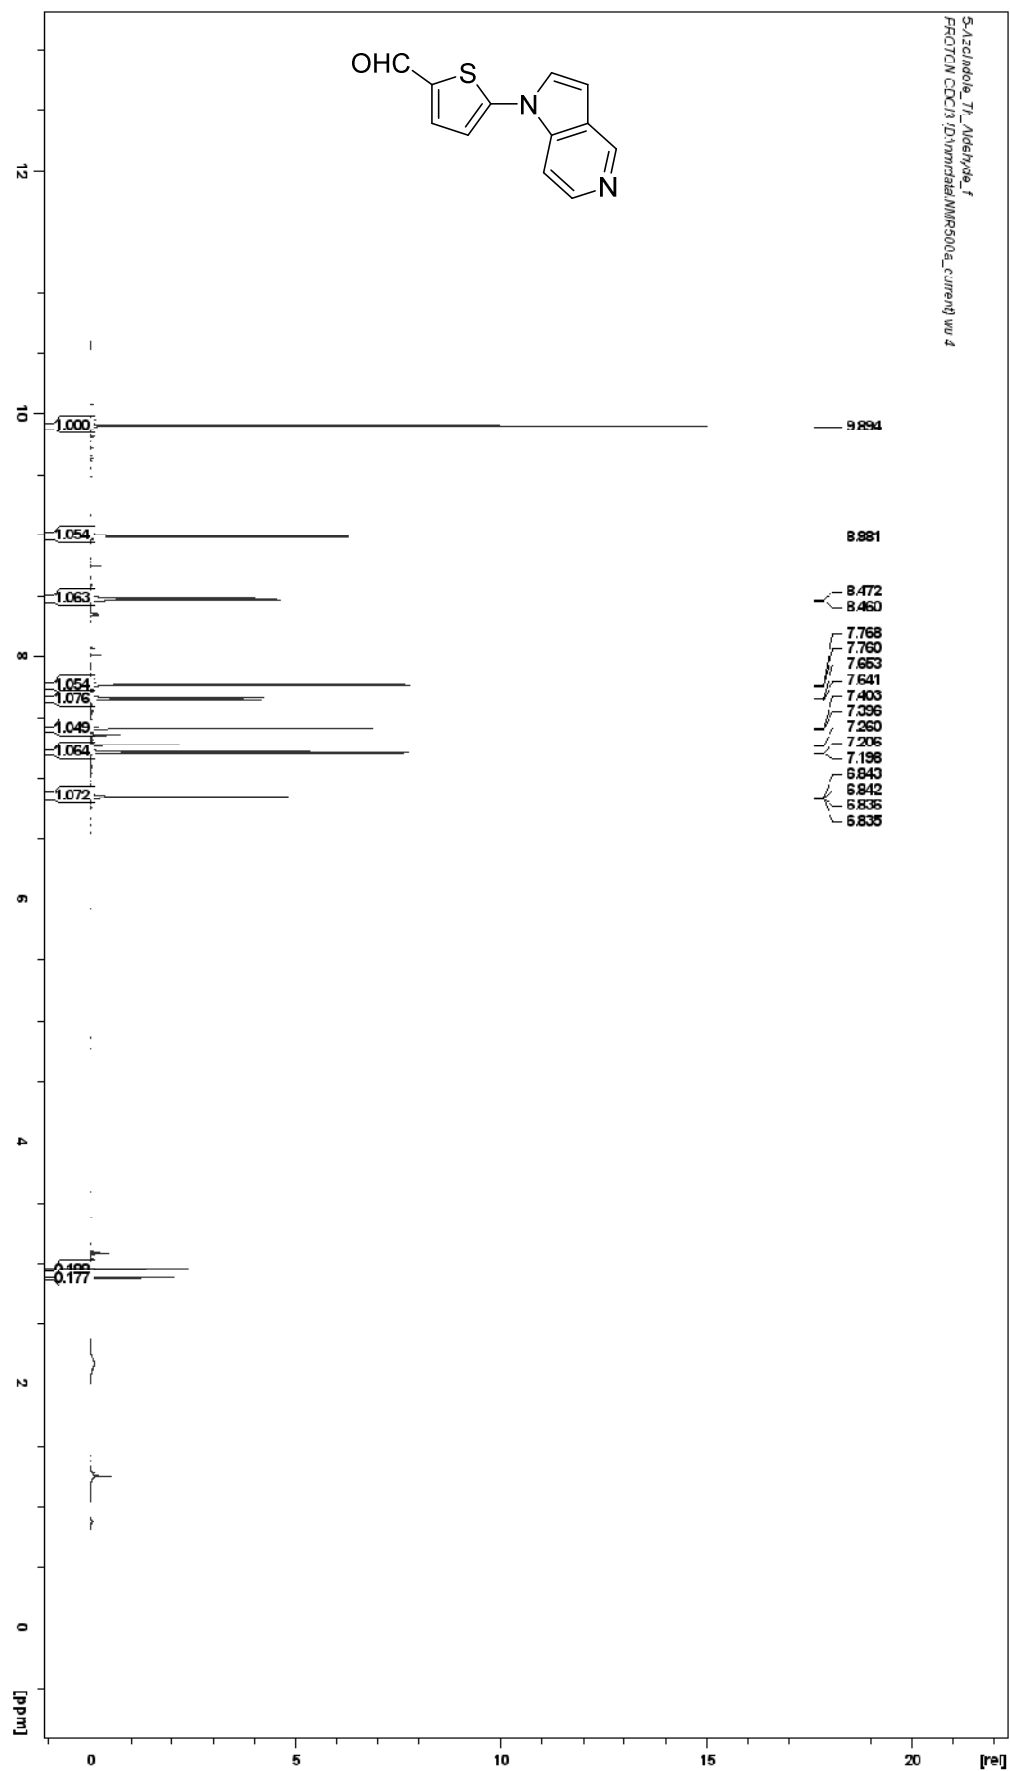

5-Azolo[4,5-b]thiazole, 2-thienyl-,  
C13CFD.CDC13 (Mm)DATA\MMSD10102\_01.cur\MS.MU.4

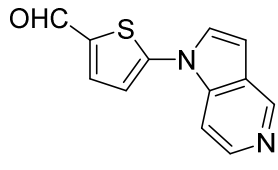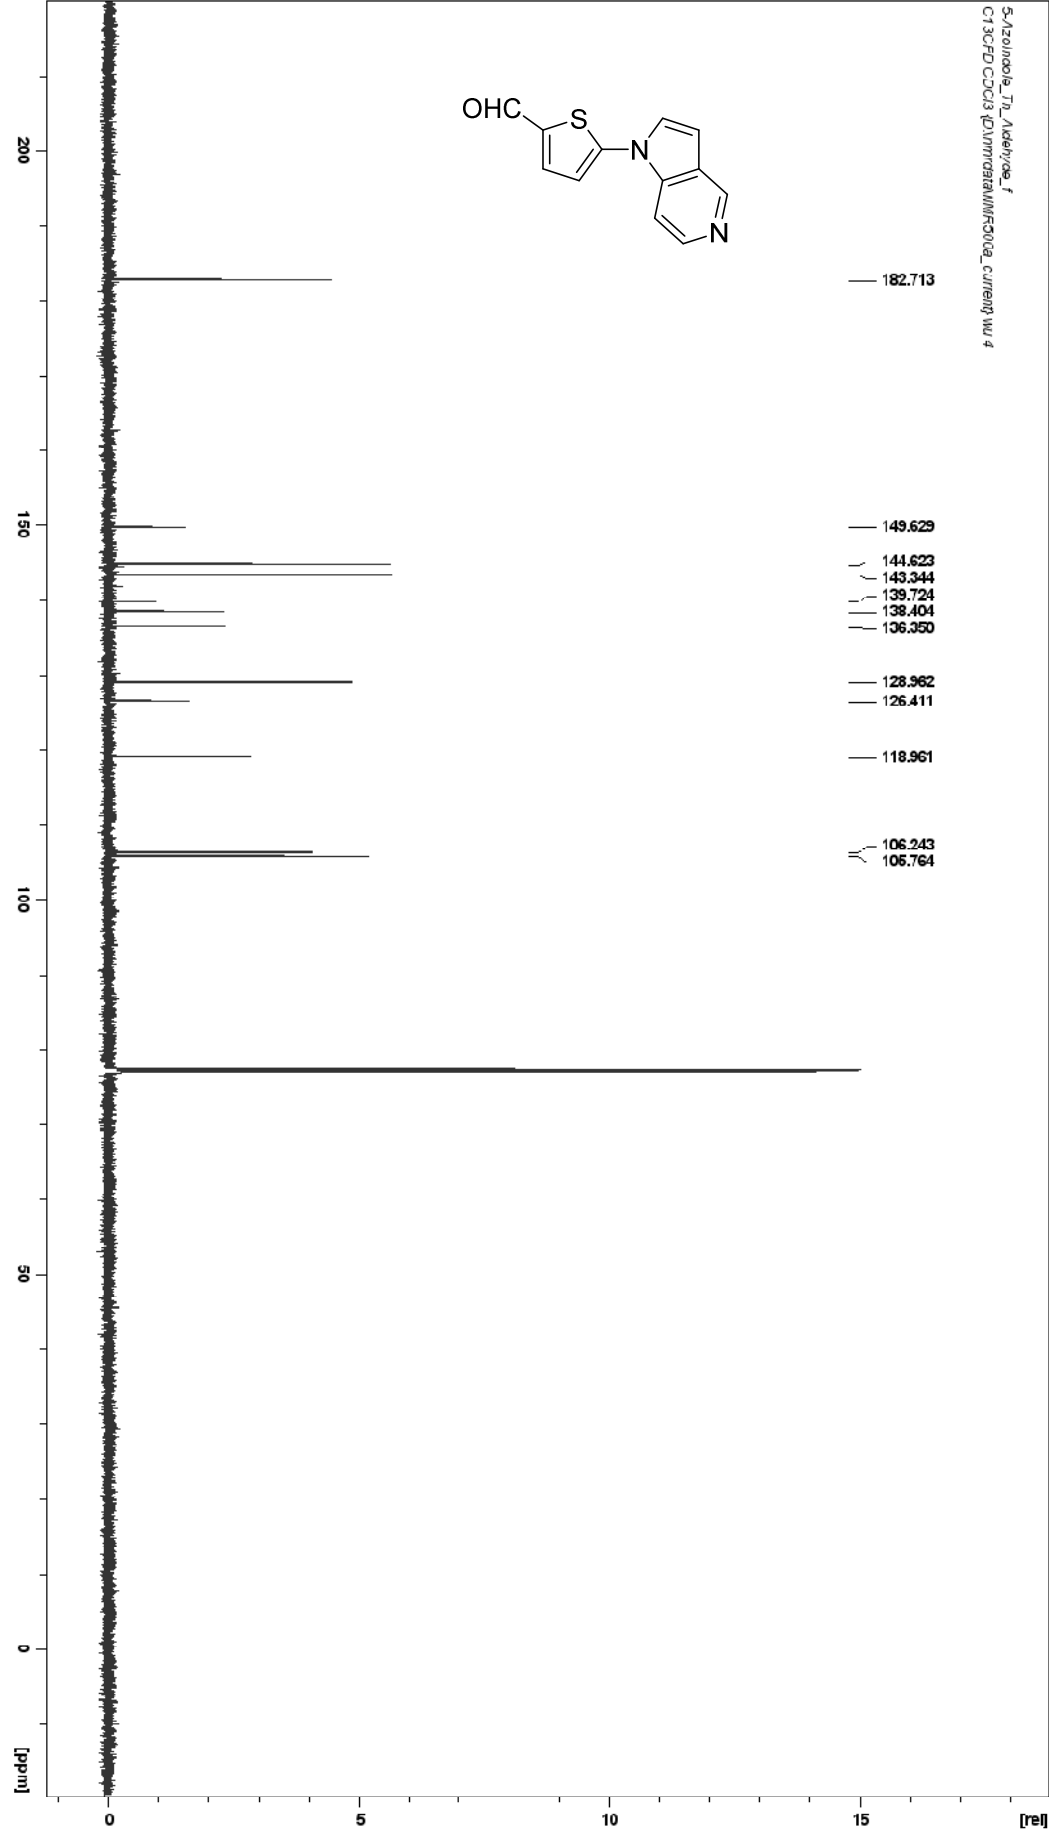

$^1\text{H}$  and  $^{13}\text{C}$ -NMR of **3d**:

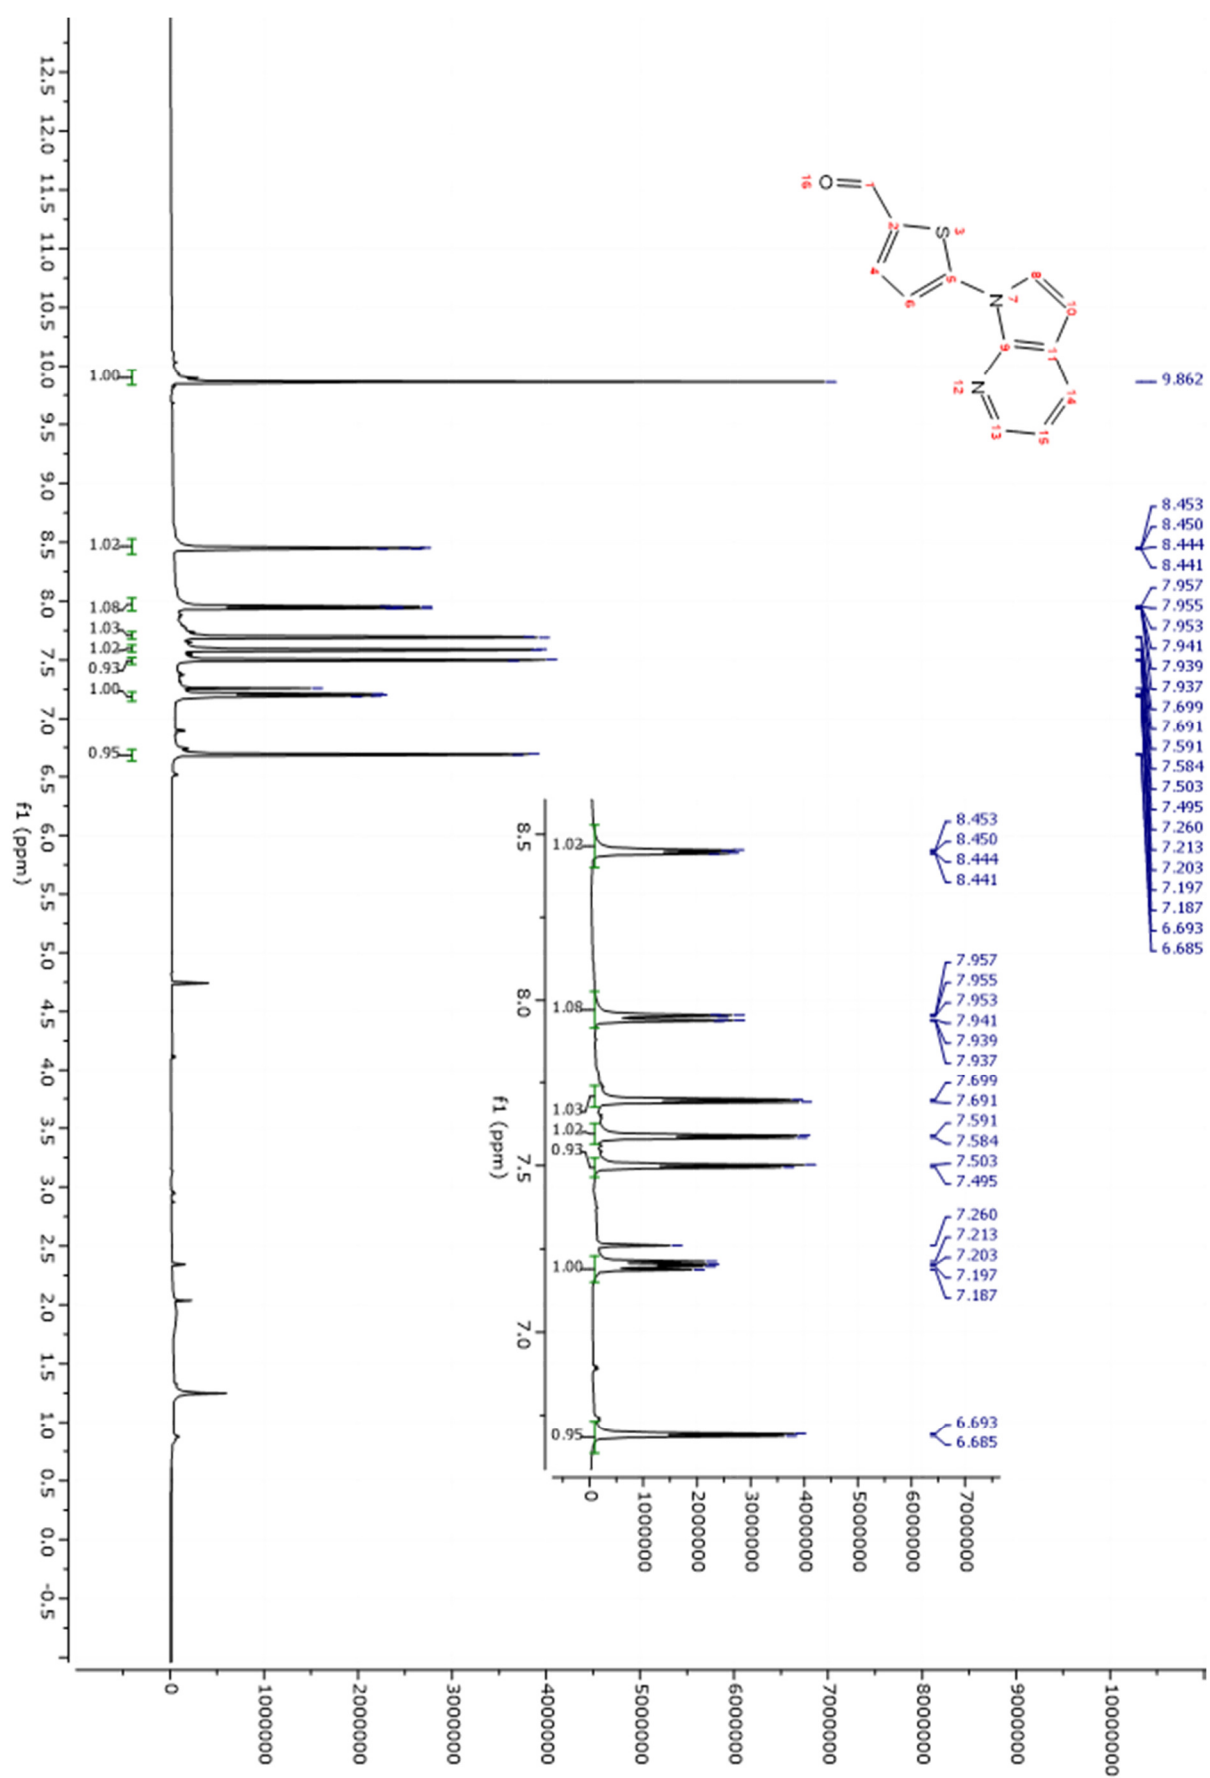

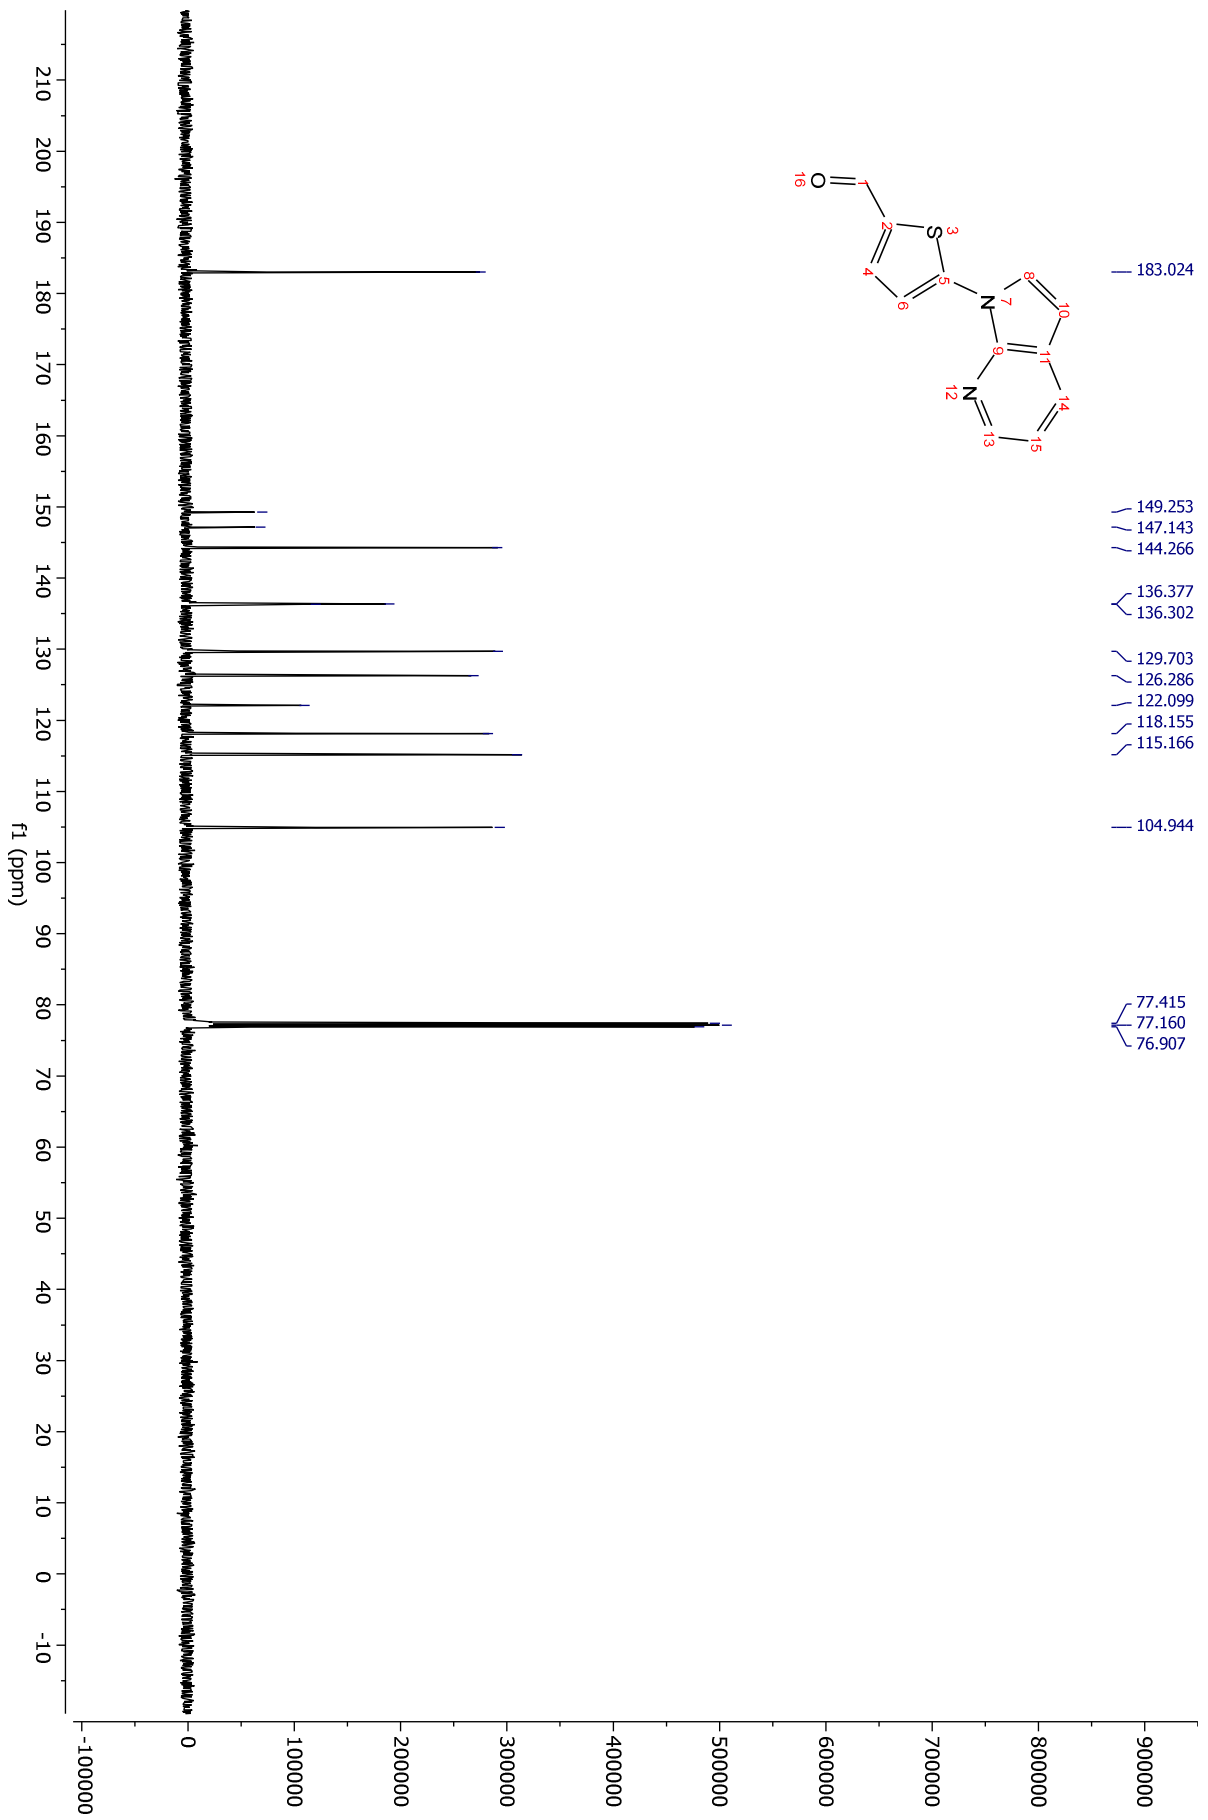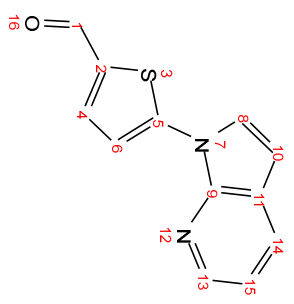

$^1\text{H}$  and  $^{13}\text{C}$ -NMR of **3e**:

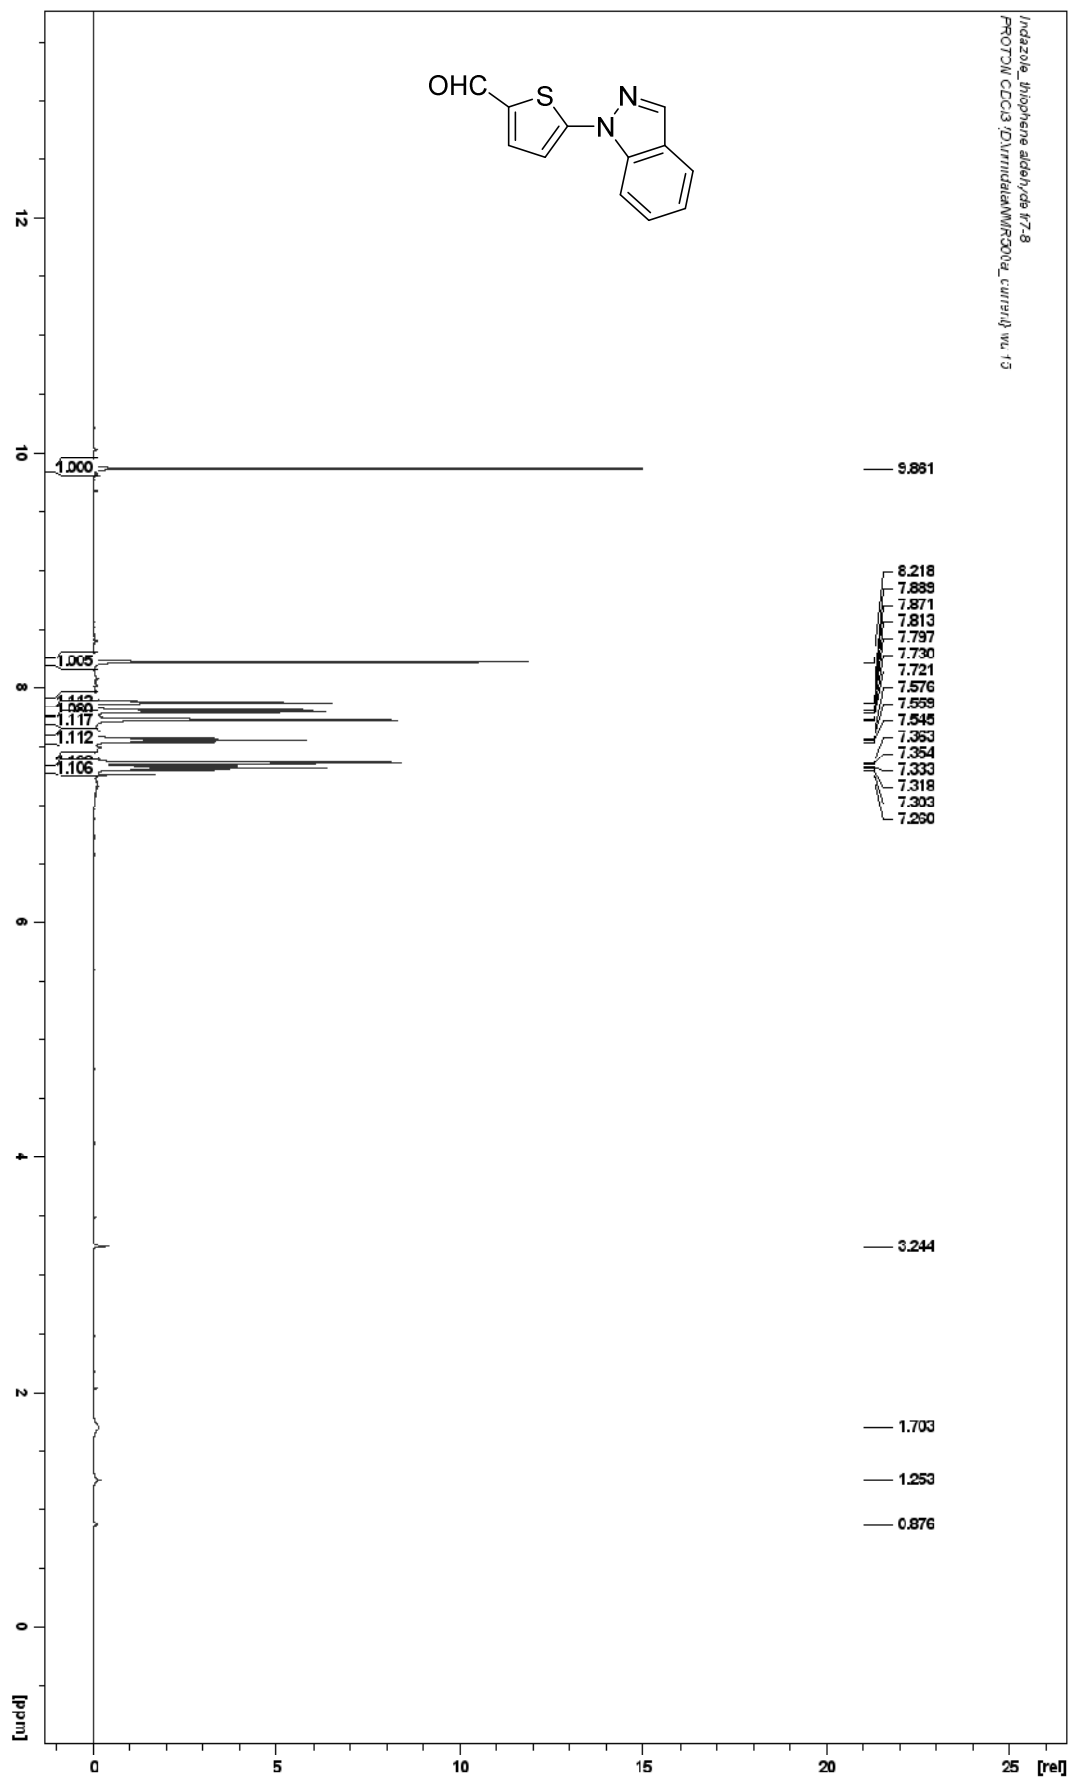

Indazole, thiophene aldehyde h7-8  
C13CPD CDCl3 ID:IMROBAM/R300a current/wu 15

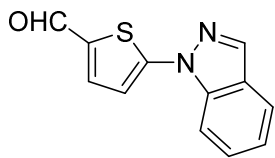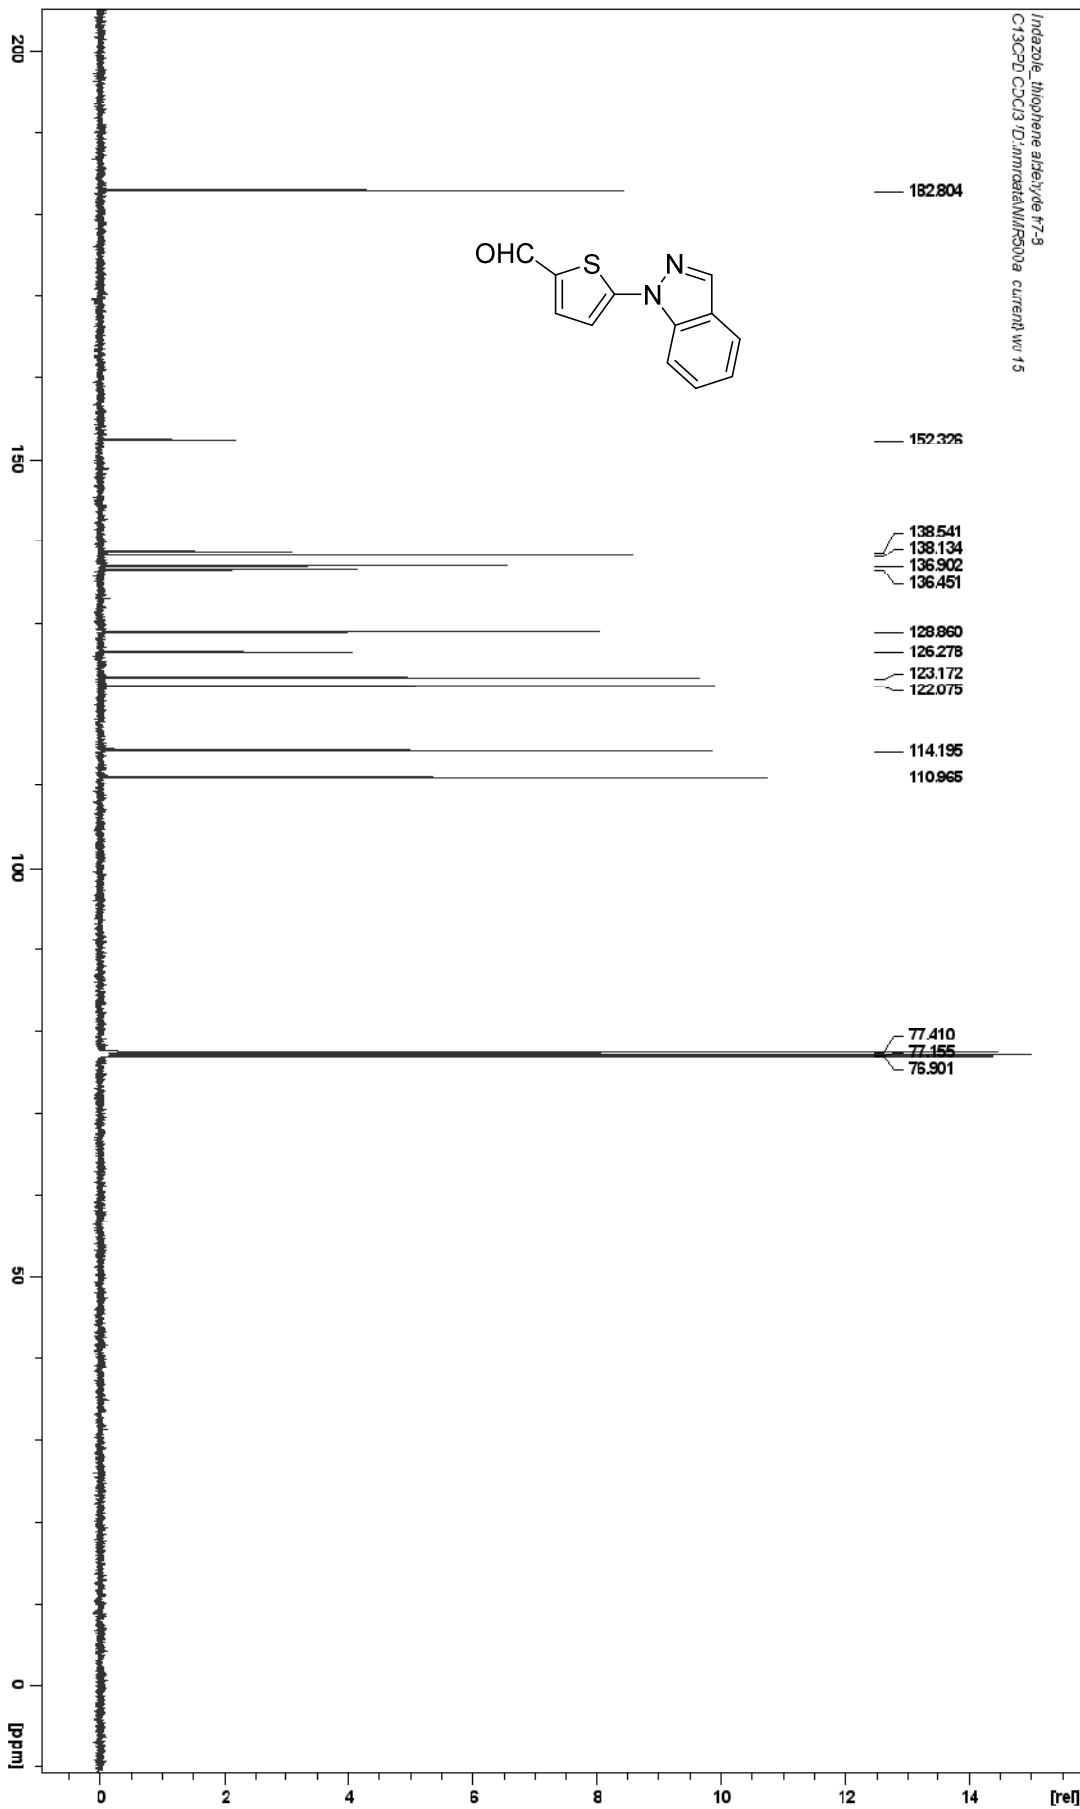

<sup>1</sup>H and <sup>13</sup>C-NMR of **3f**:

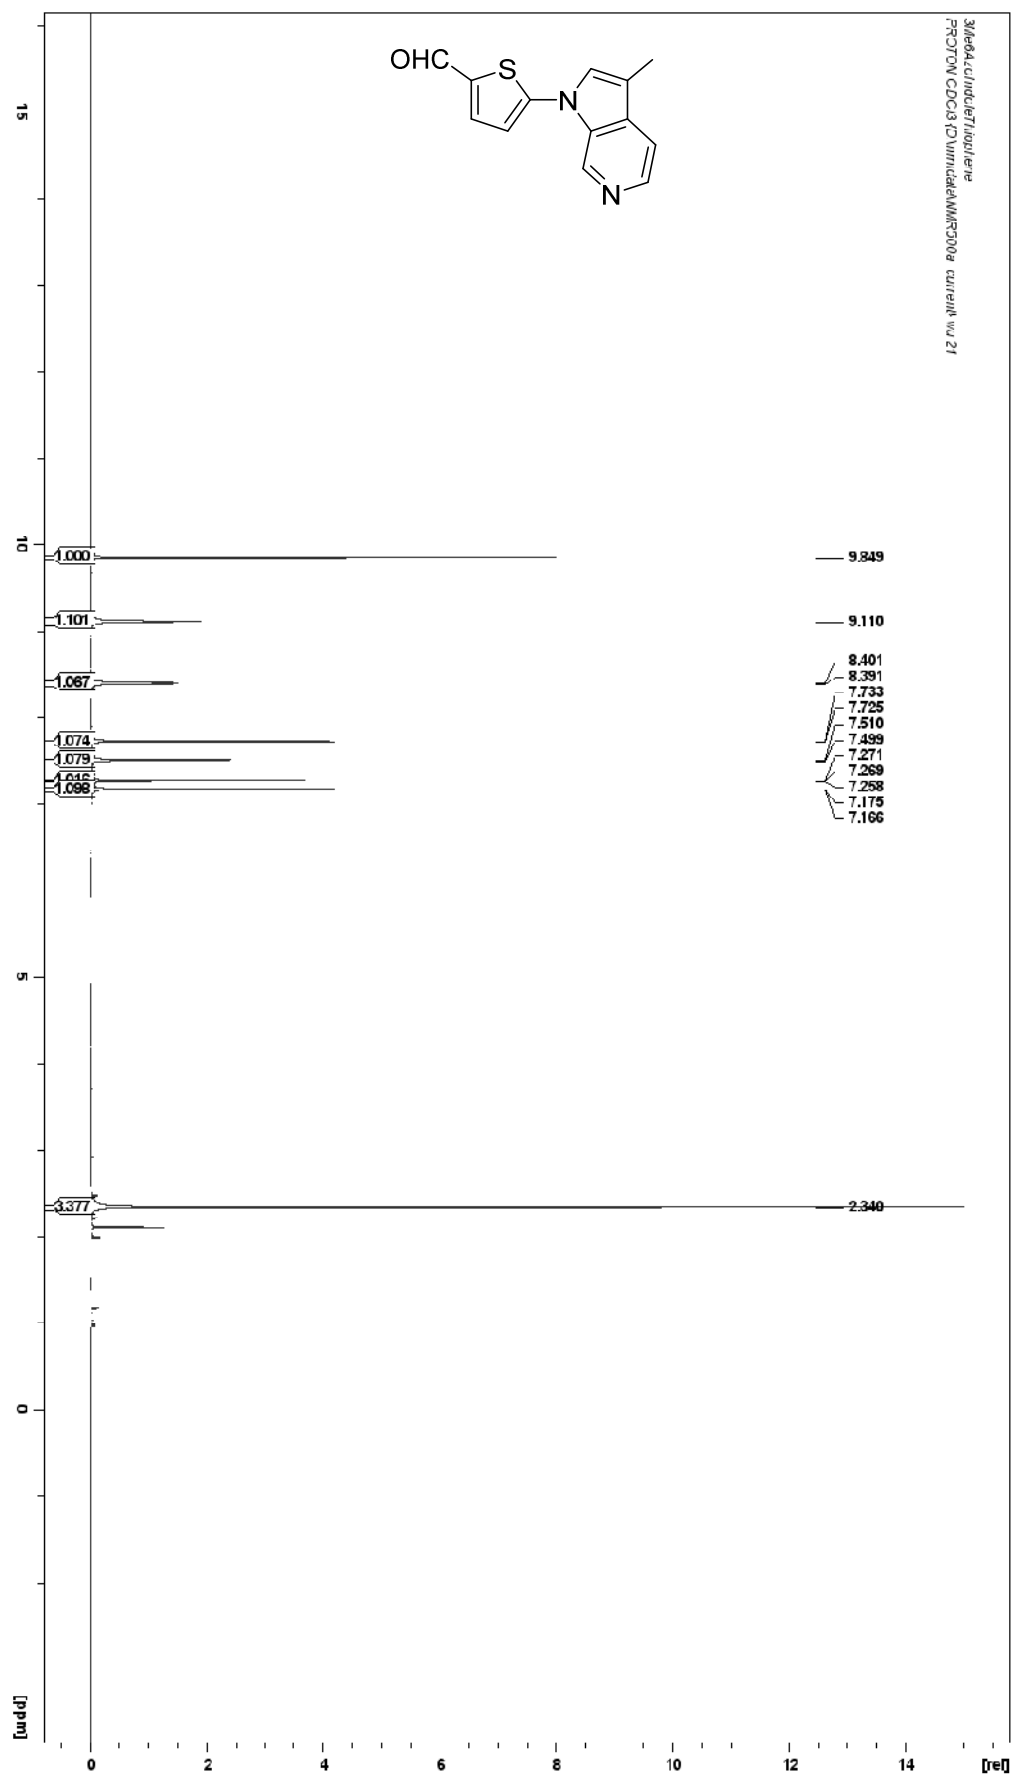



3-Methylindol-3-ylthiophene  
C13CPD CDCl3 (C:\ProgramData\NMR\CDCl3\_current\WU 21

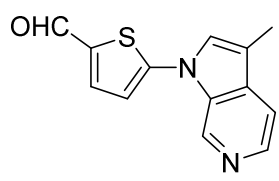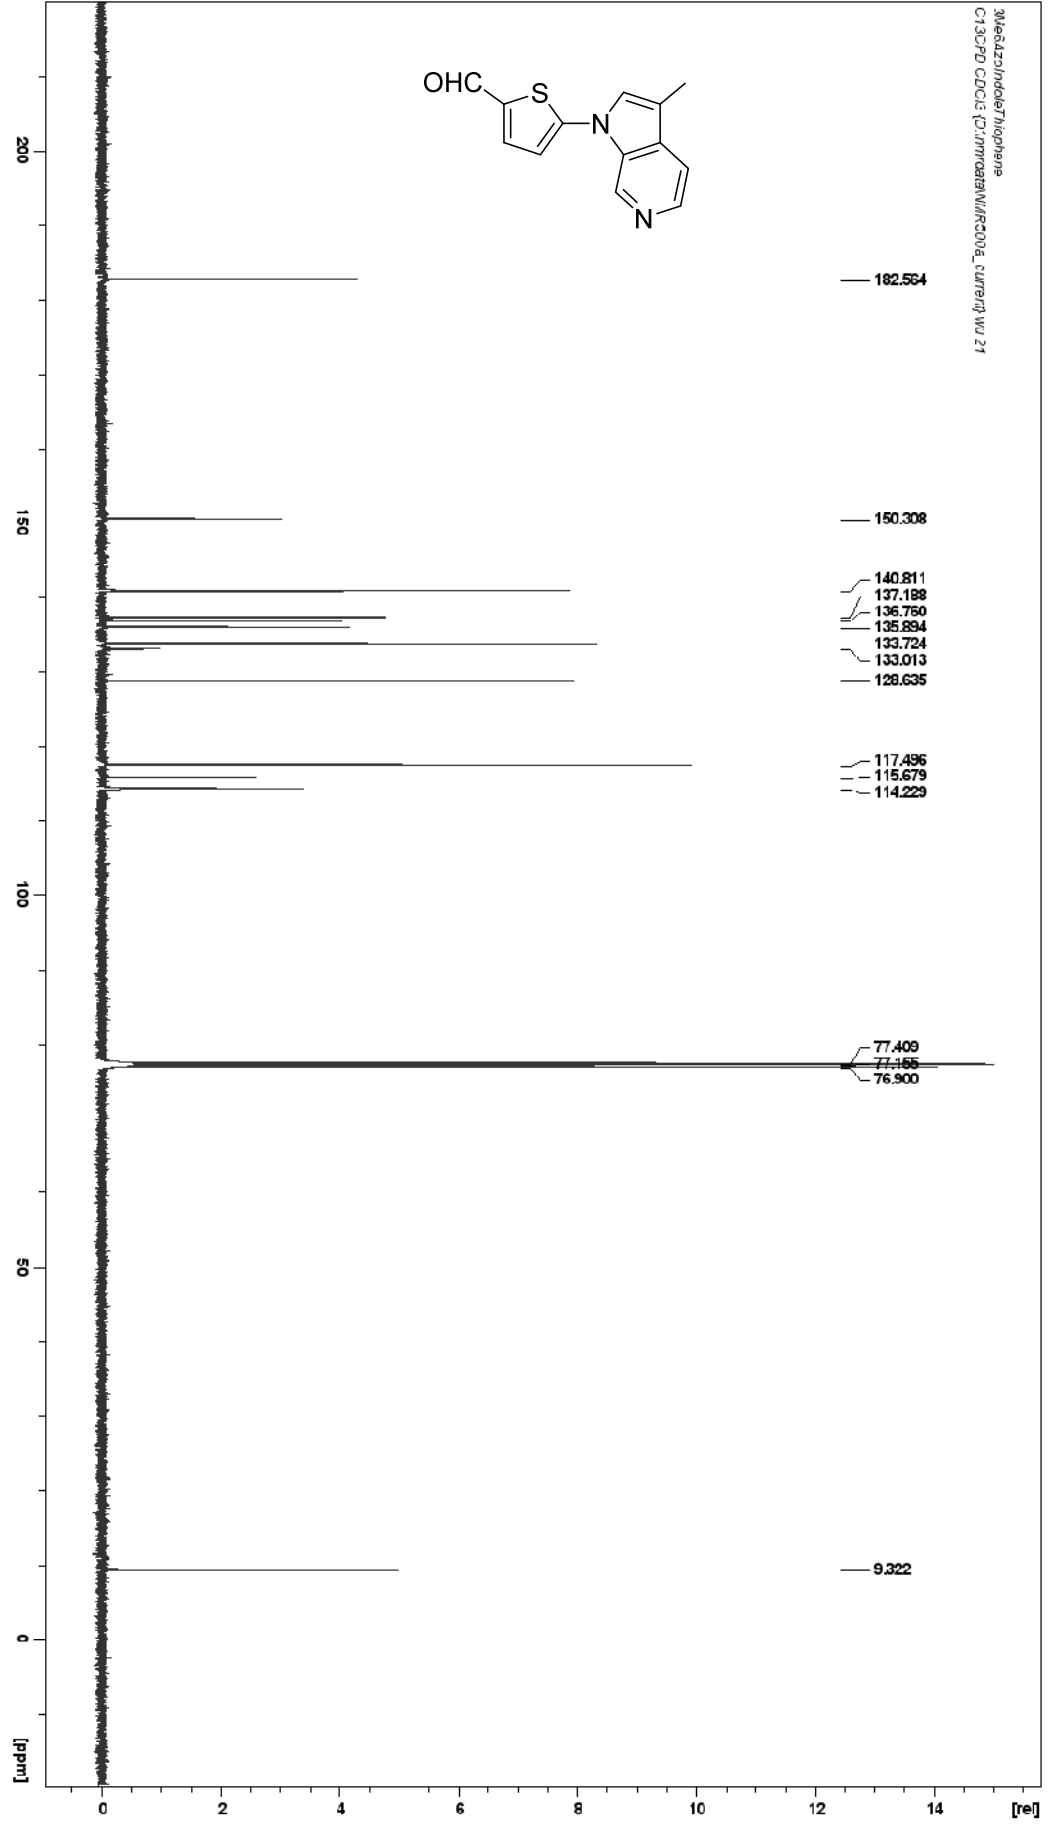

<sup>1</sup>H and <sup>13</sup>C-NMR of **3g**:

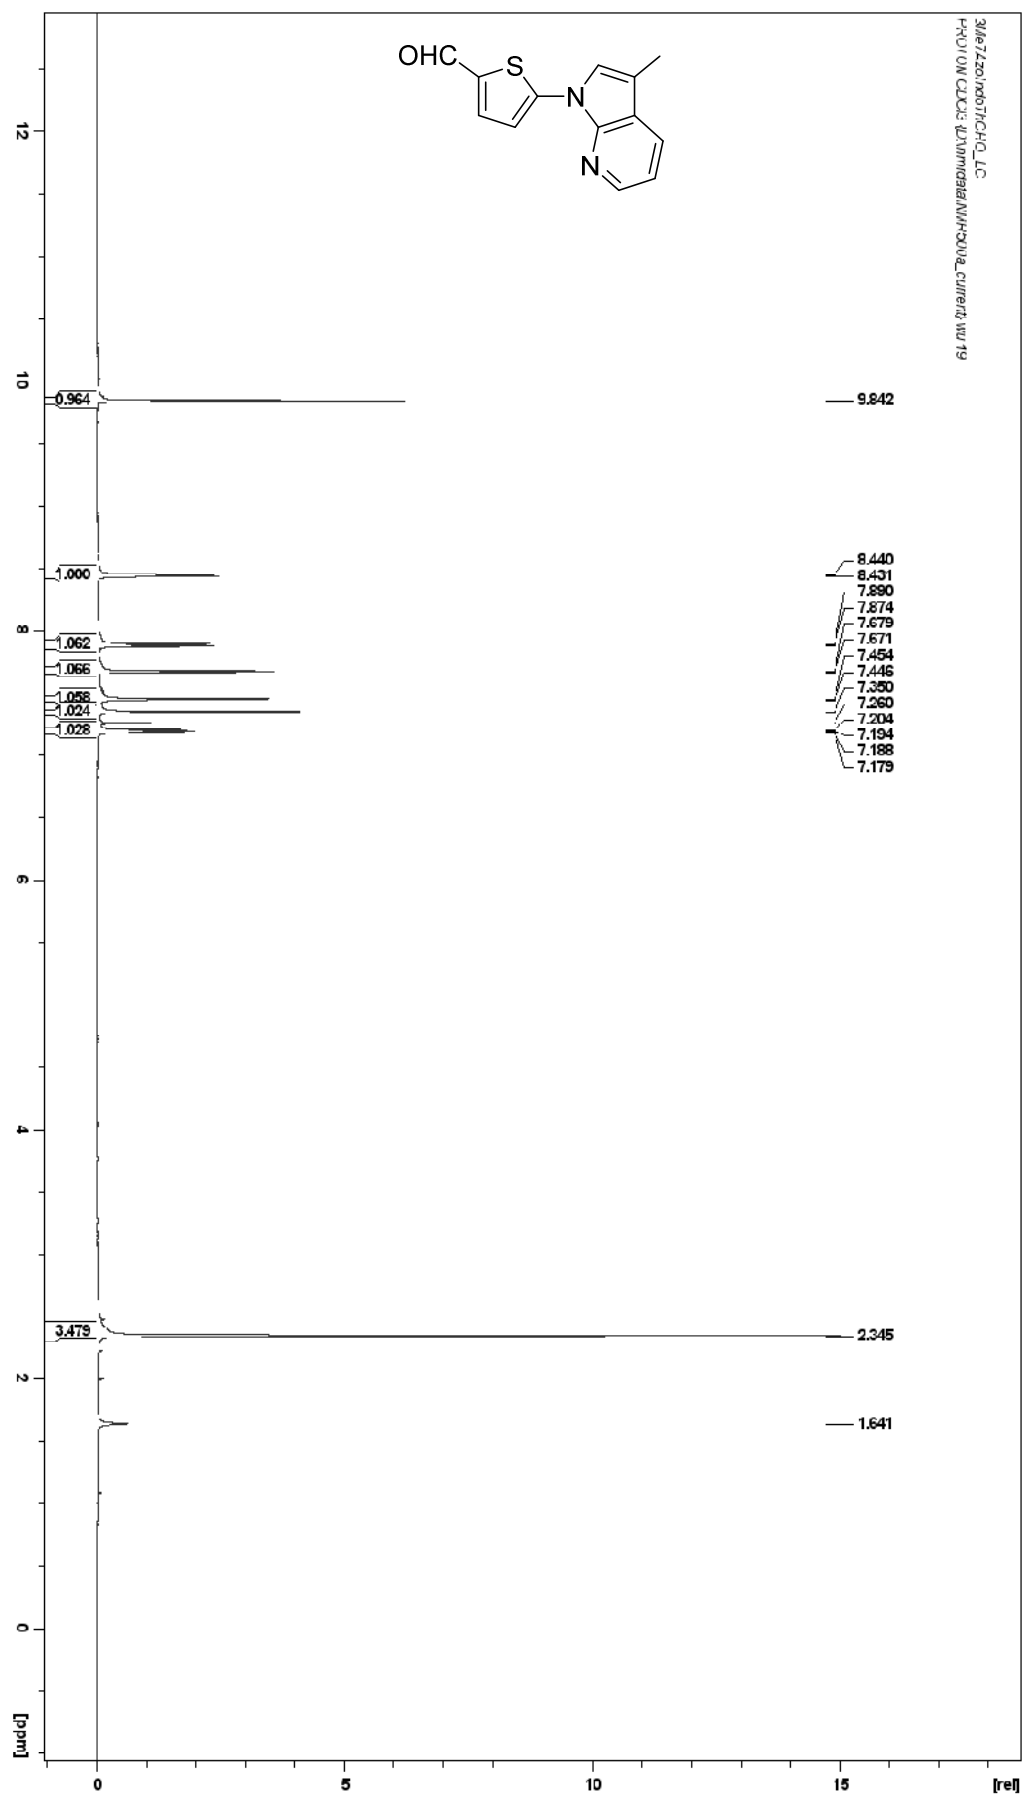

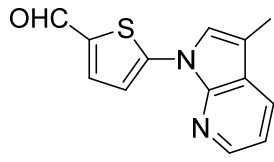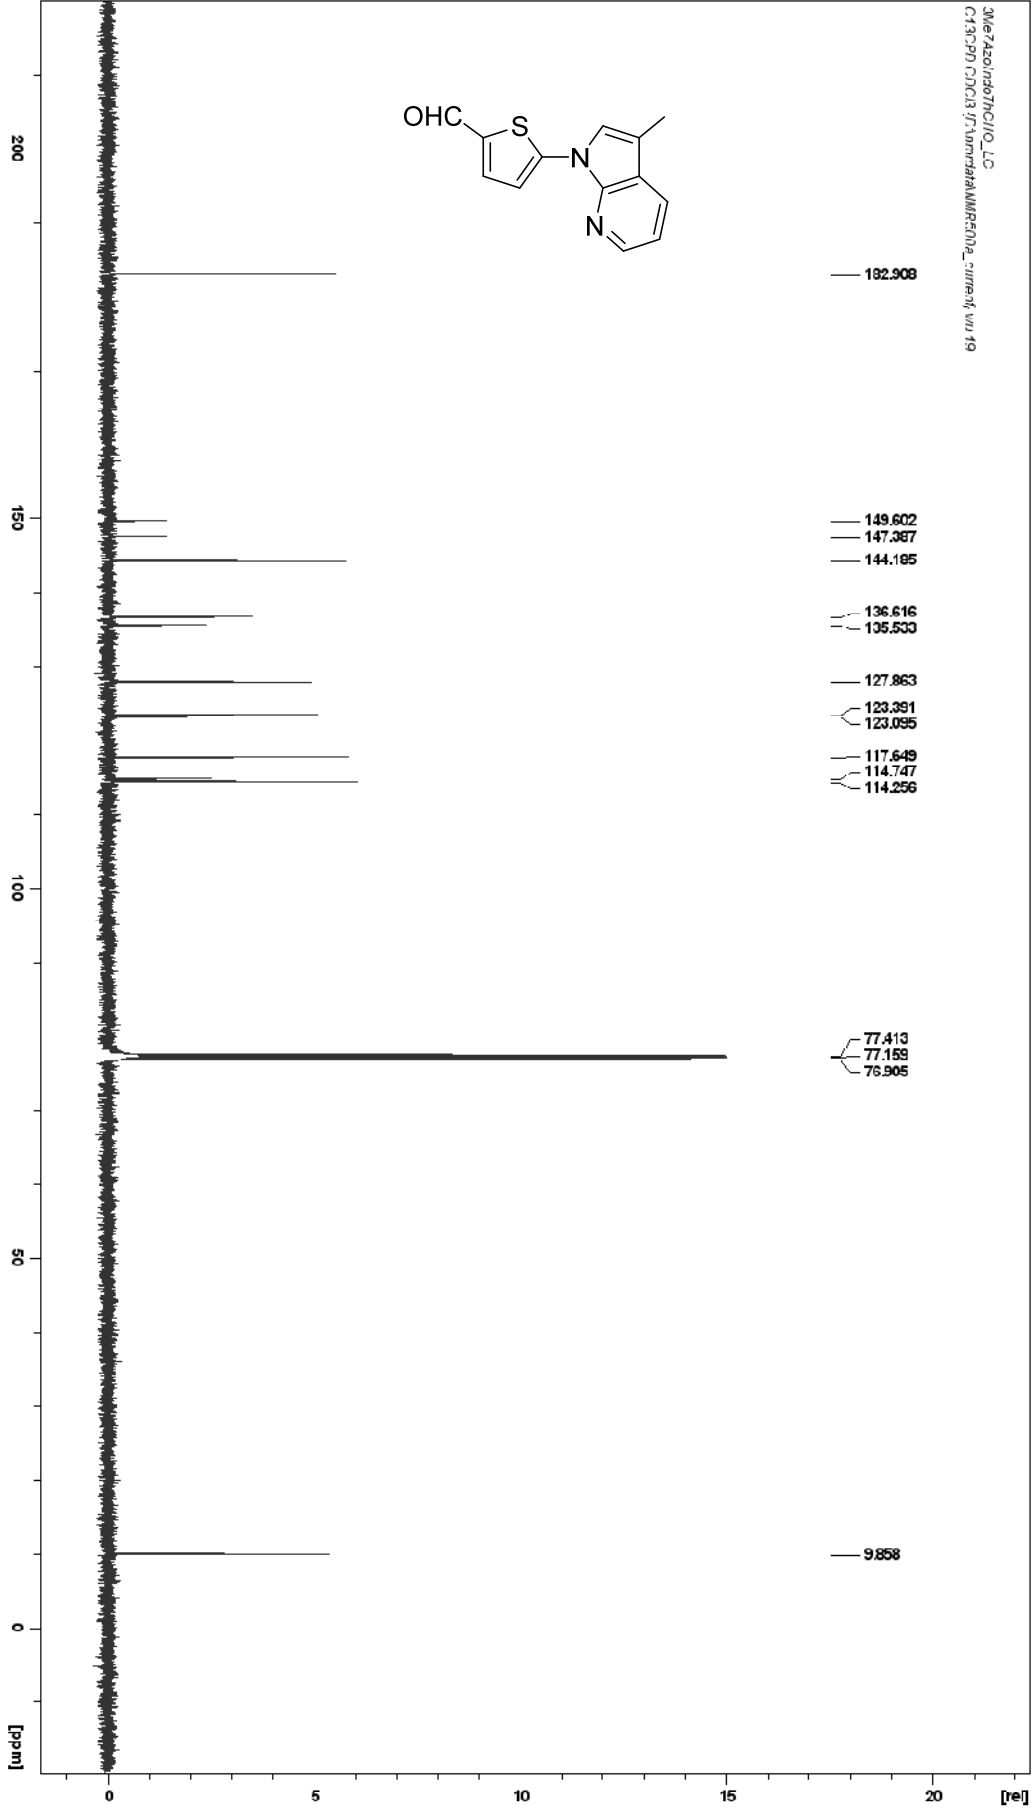

$^1\text{H}$  and  $^{13}\text{C}$ -NMR of **3h**:

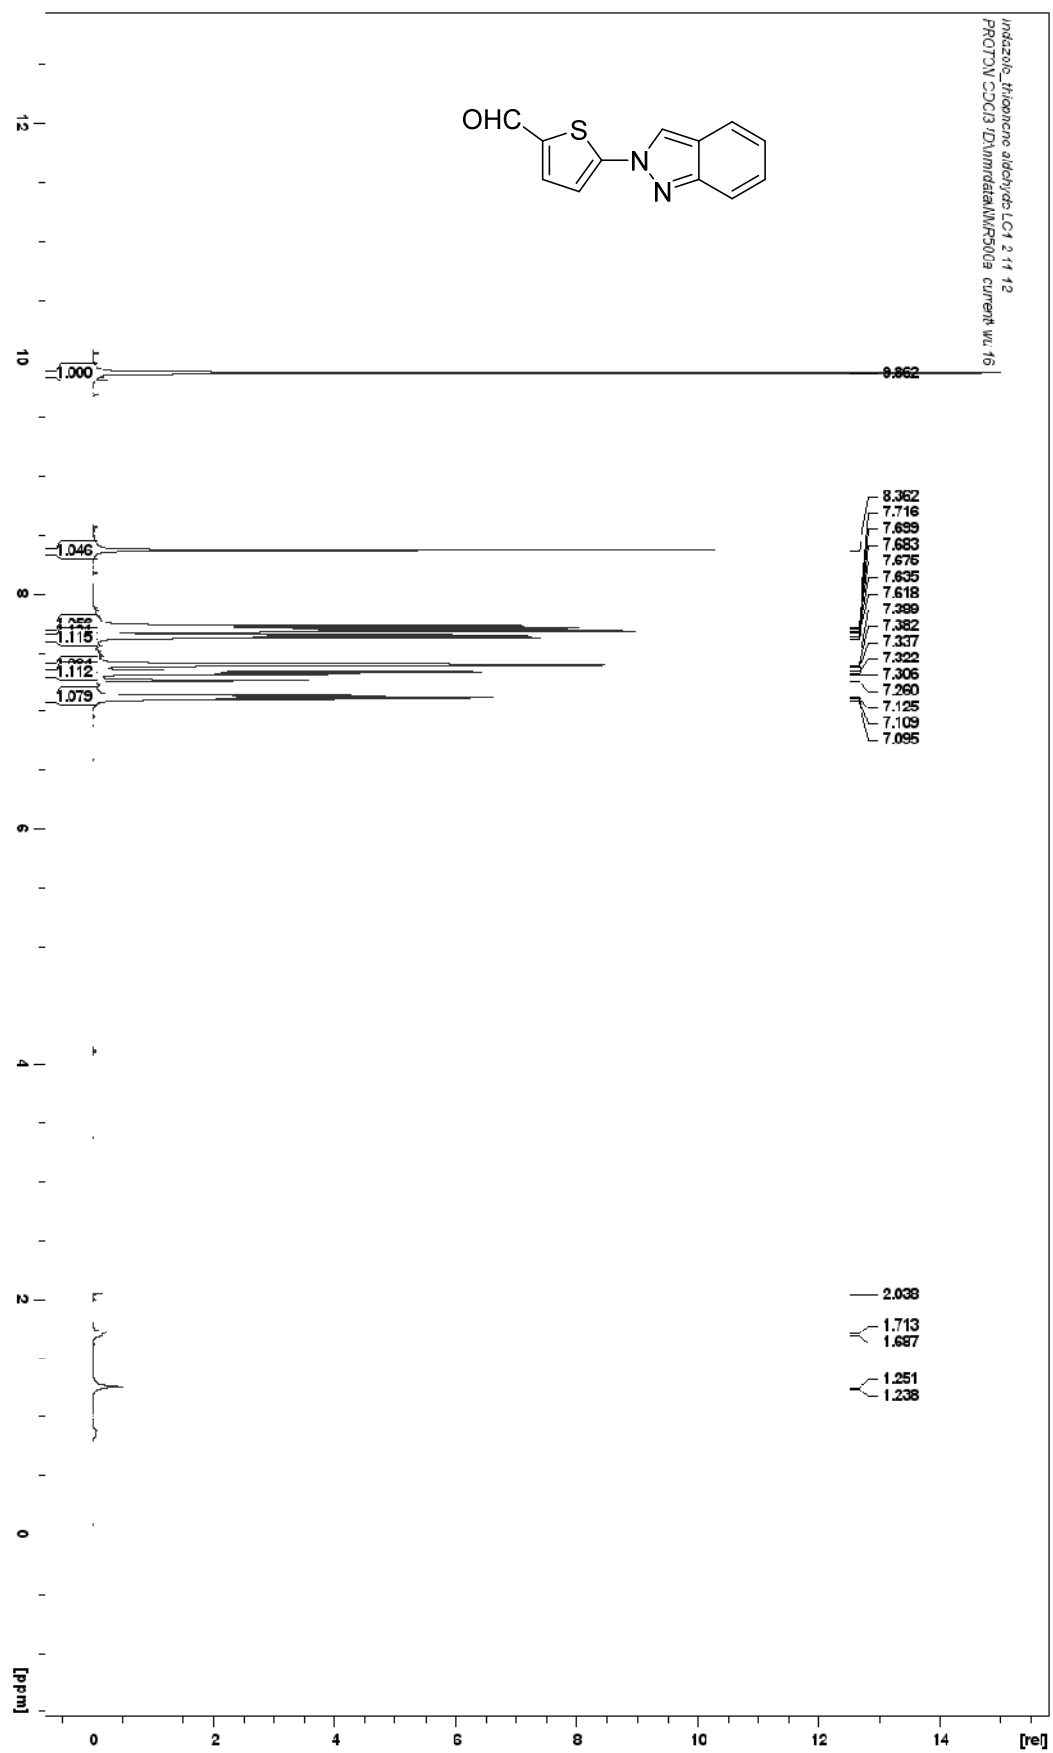

Indazole thiophene aldehyde LC1-2-11-12  
C:\3CPD\_CD\13 [D:\mdata\MP500a\_current] v16

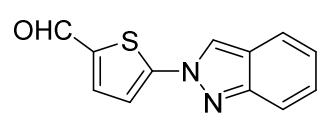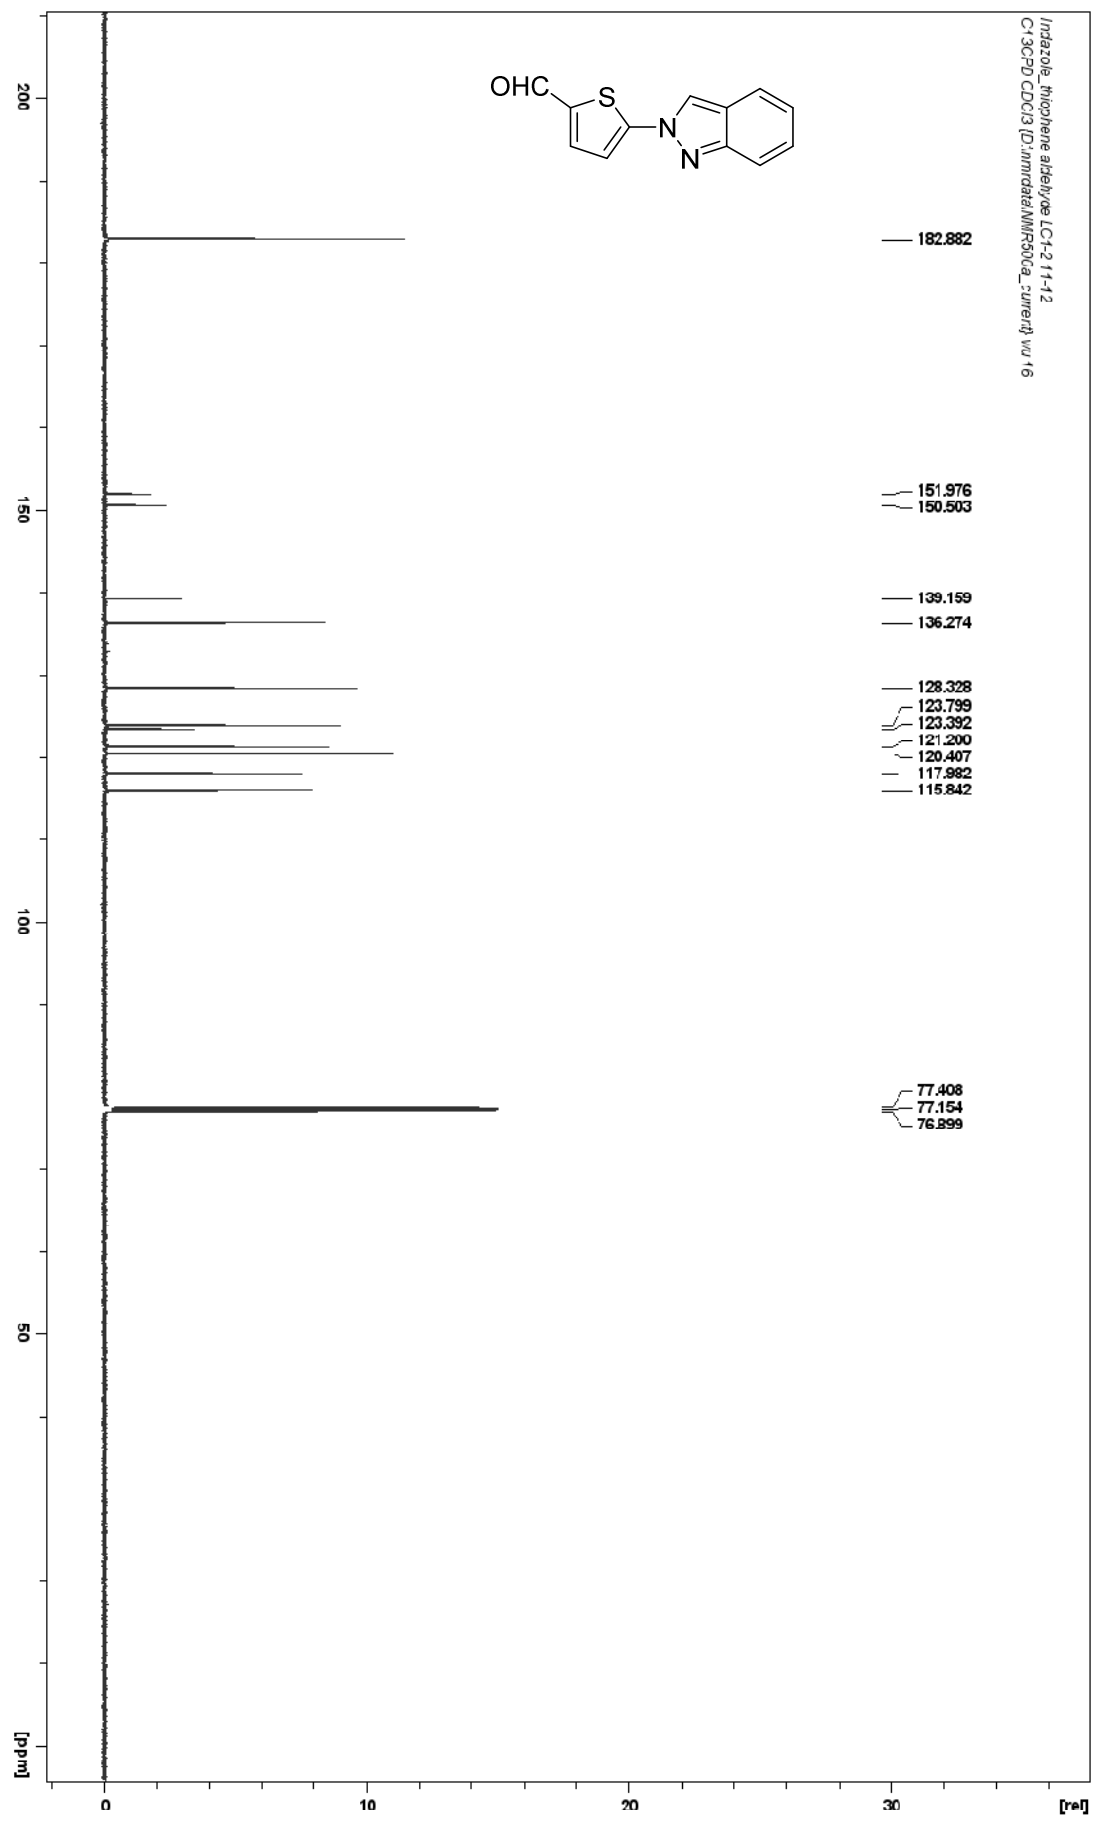

$^1\text{H}$  and  $^{13}\text{C}$ -NMR of **7b**:

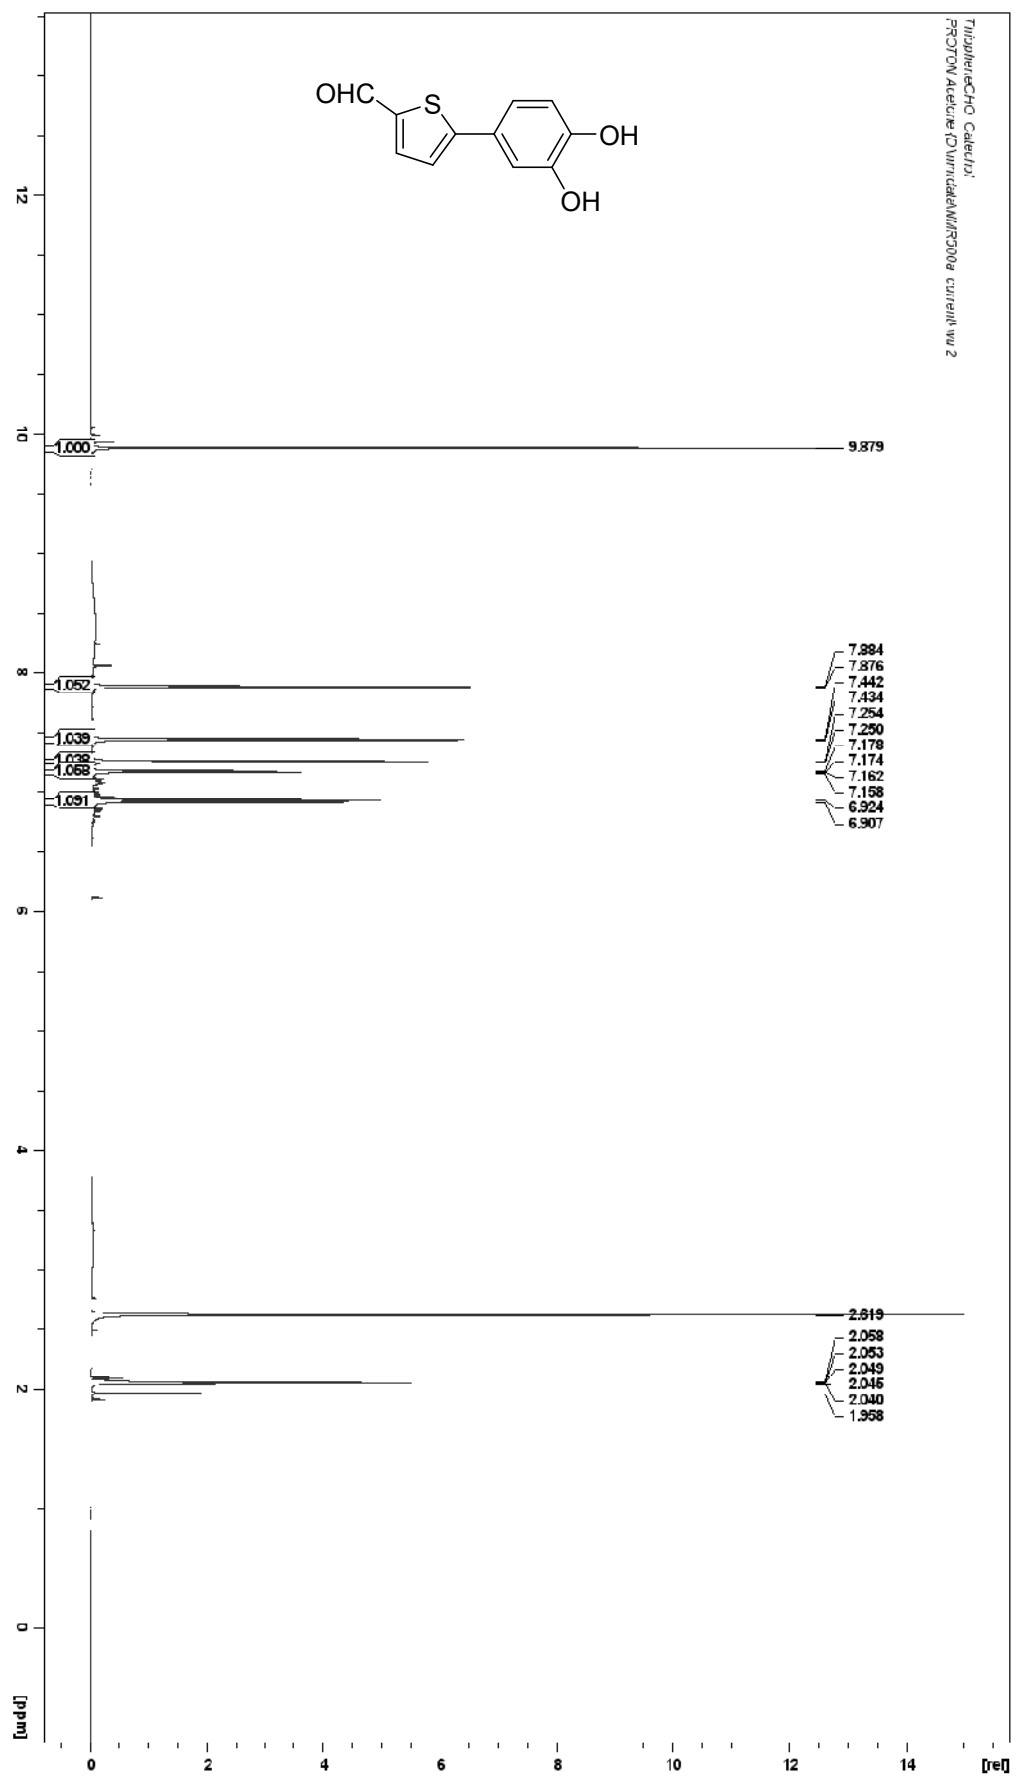

ThiopheneCH<sub>2</sub>\_Catechol  
C13CPD Acetone (DMSO-d6)MIF500a\_current.vi2

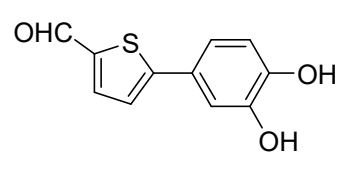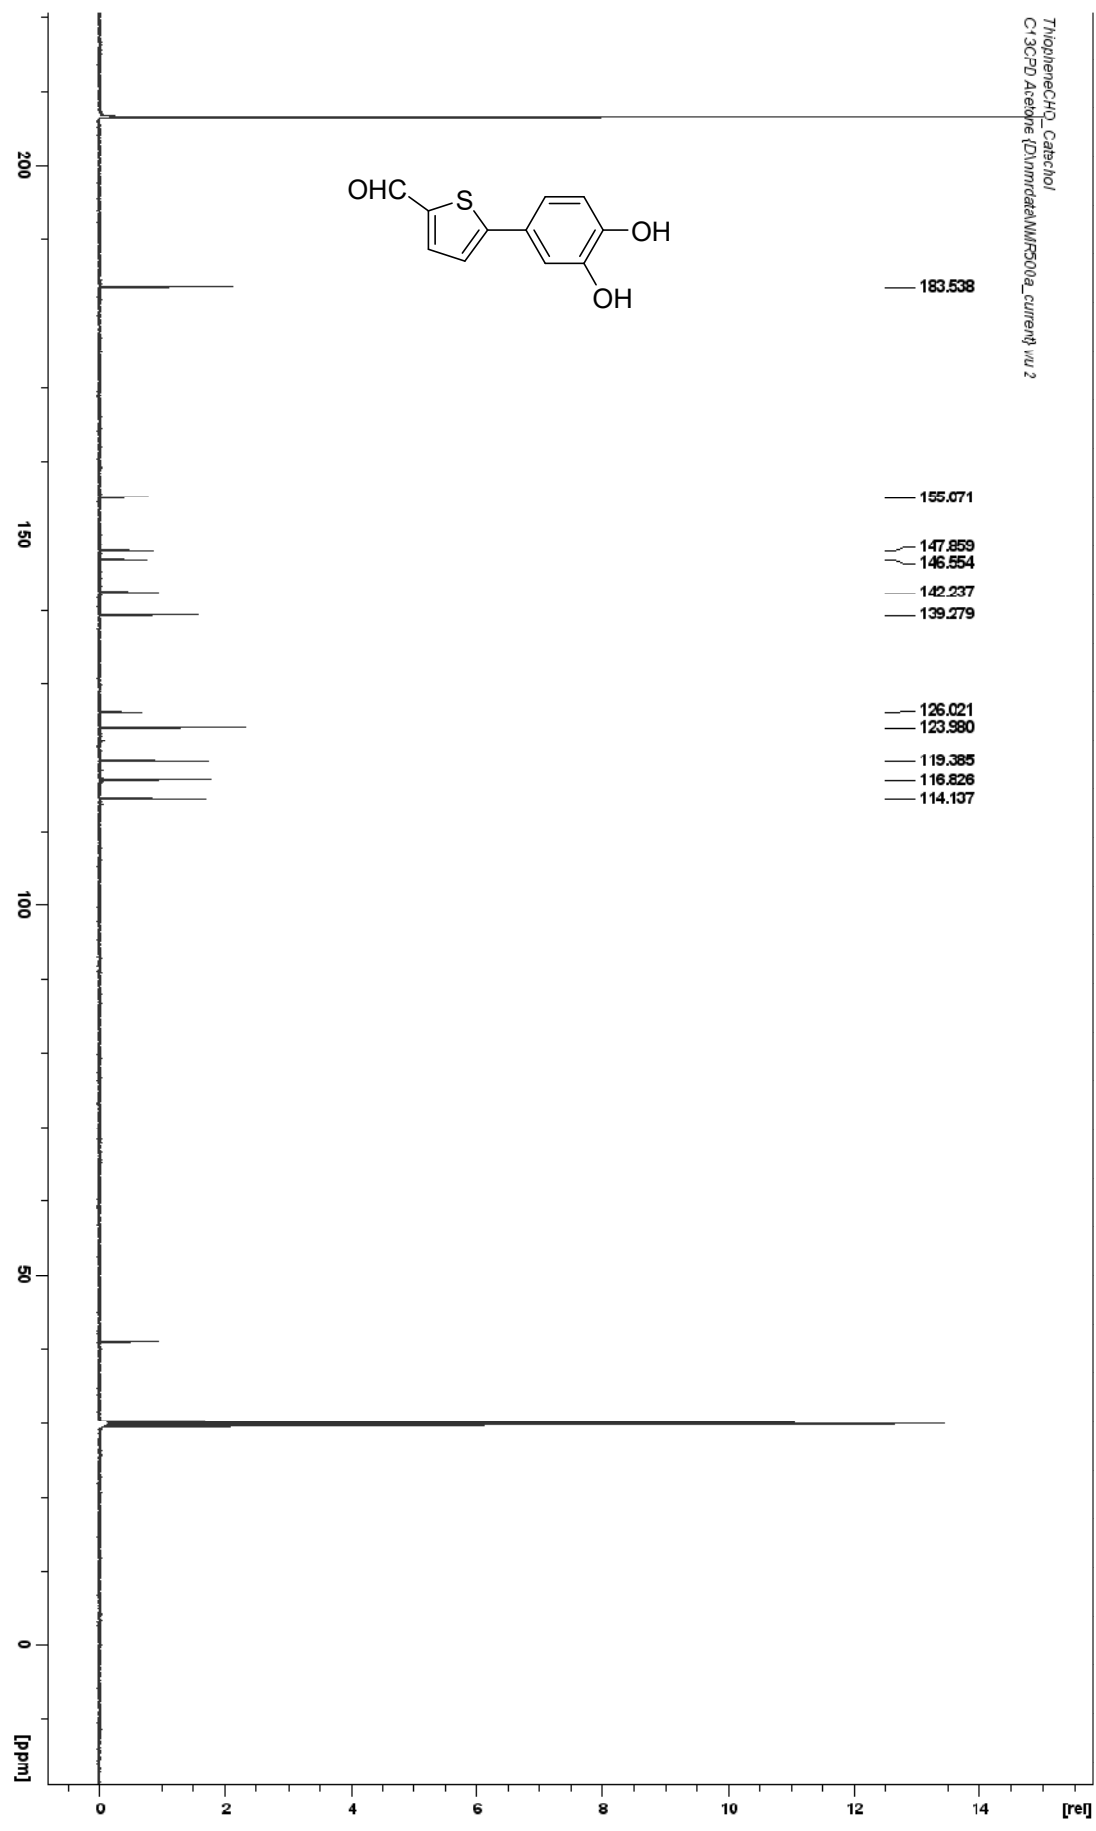

$^1\text{H}$  and  $^{13}\text{C}$ -NMR of **7c**:

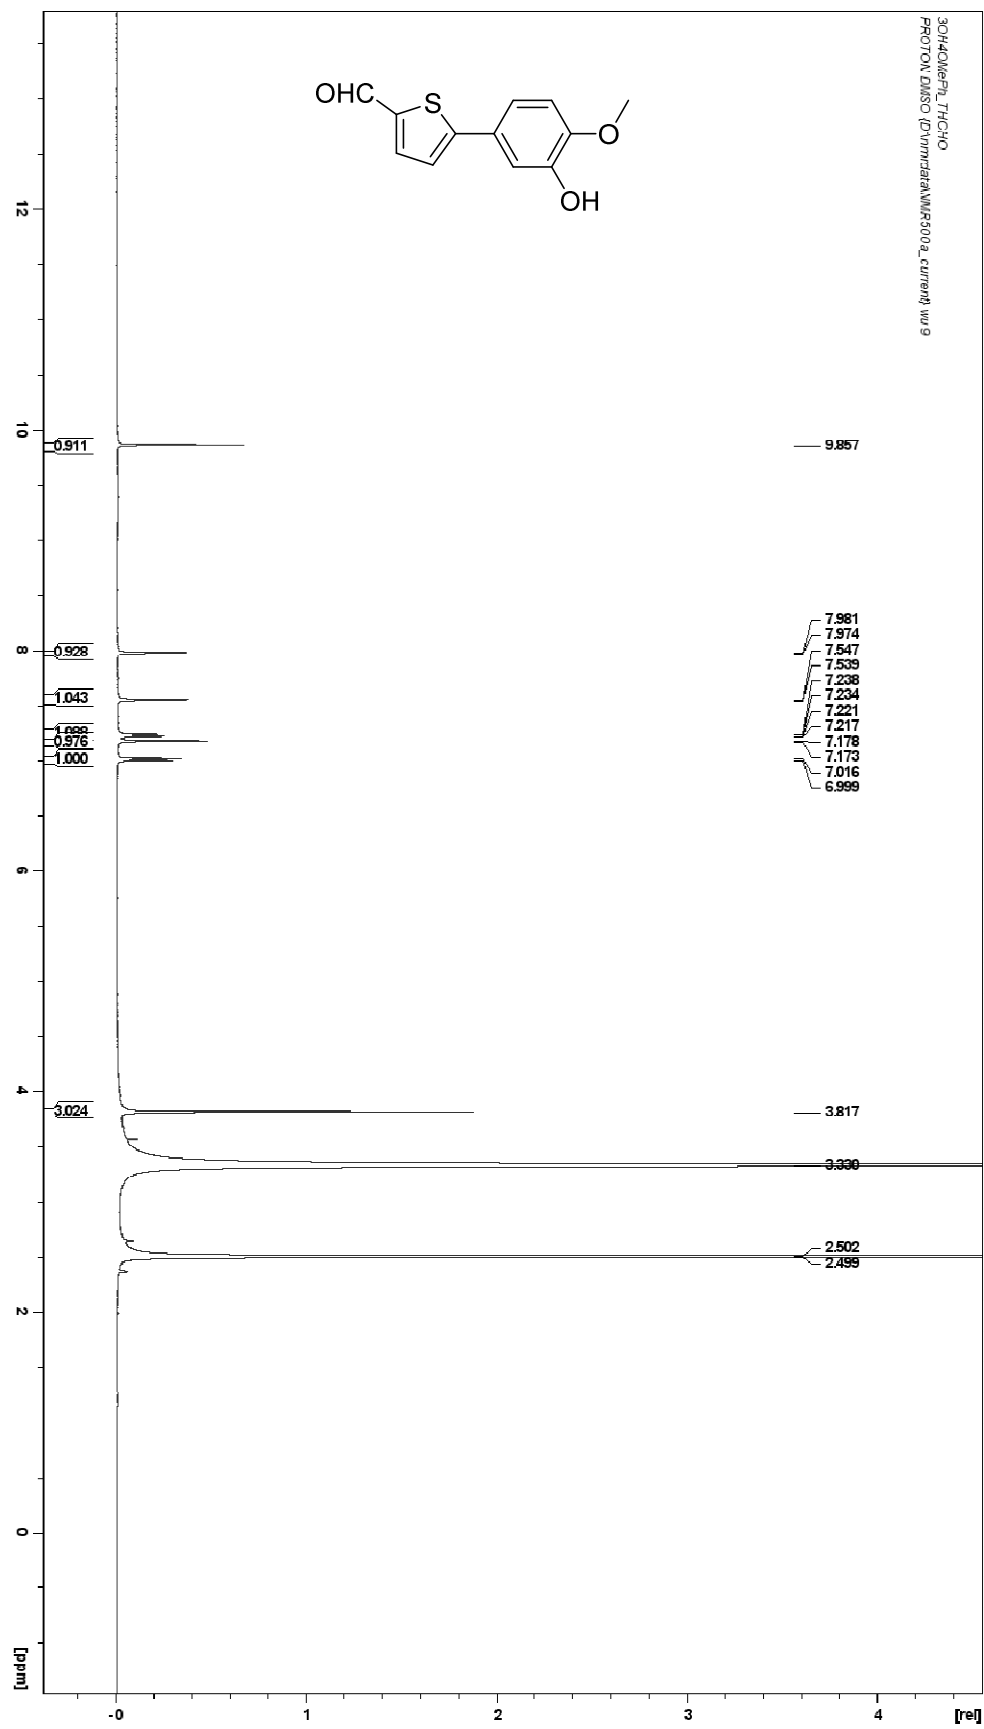



3C<sub>41</sub>O<sub>16</sub>SP<sub>1</sub> THCAO  
C13CPD JMSO 4DMMDAAMR200A\_201901\_VIA.S

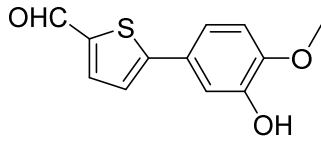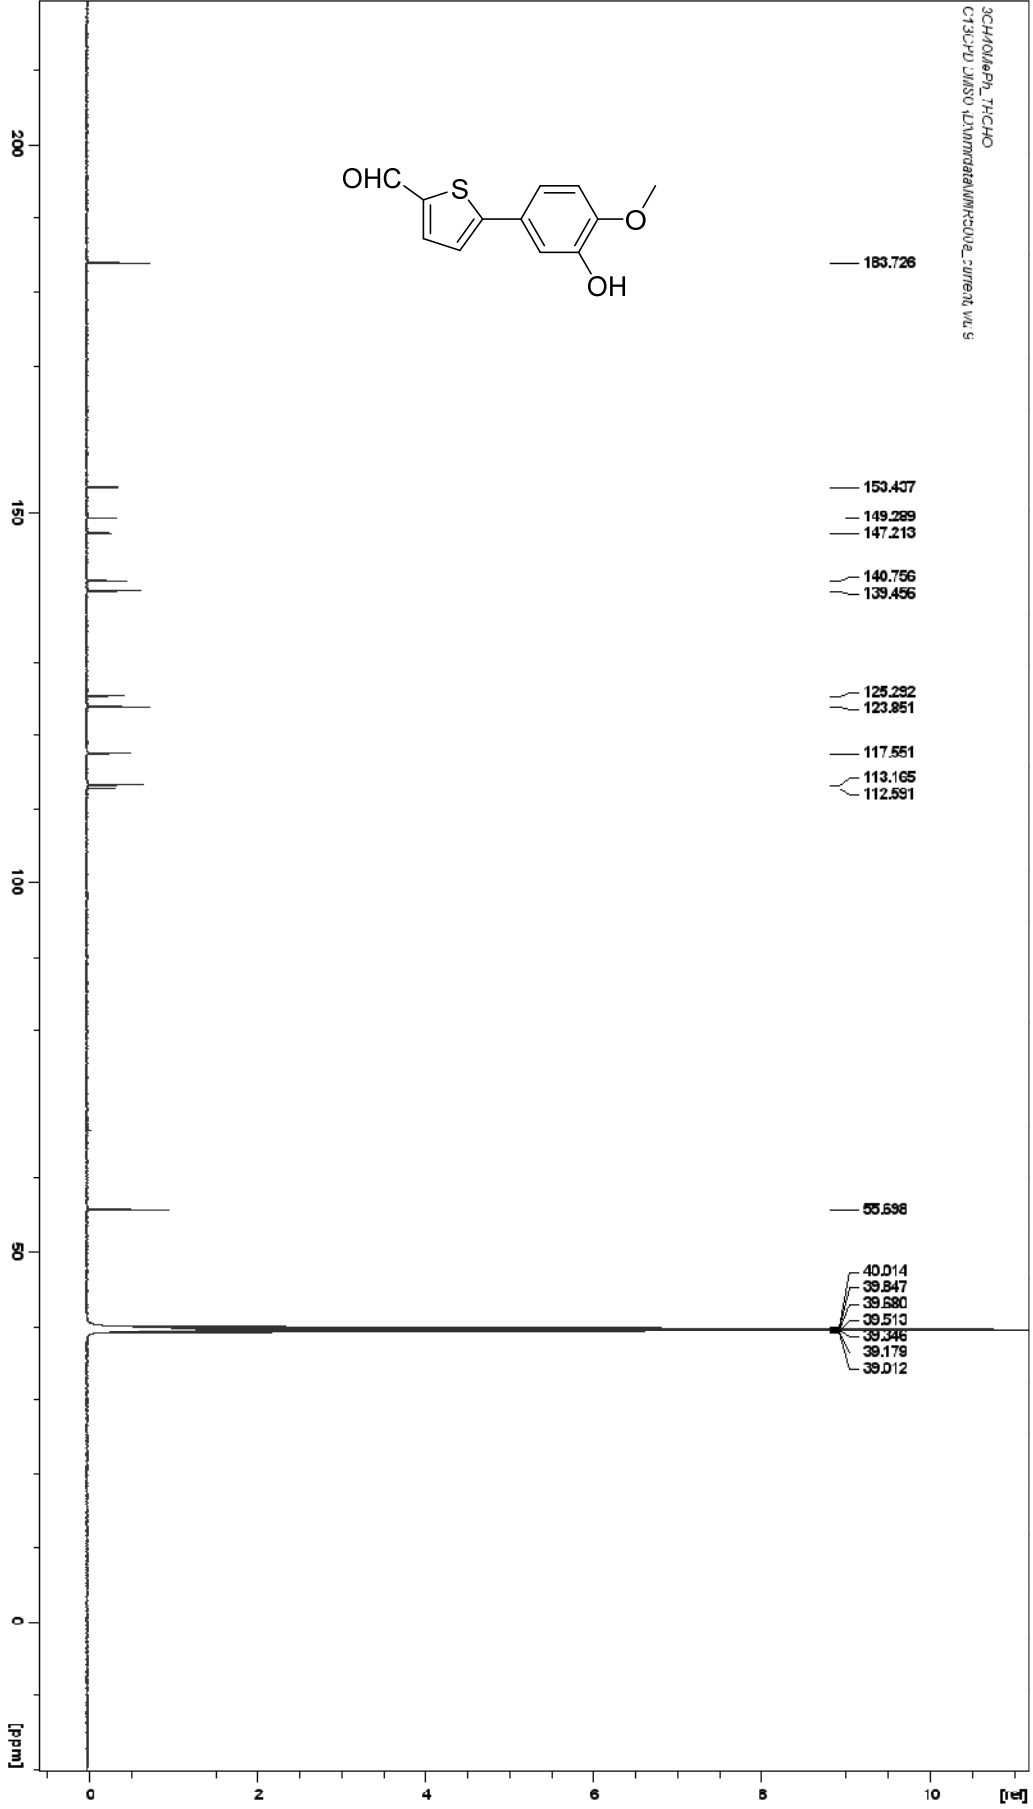

$^1\text{H}$  and  $^{13}\text{C}$ -NMR of **7d**:

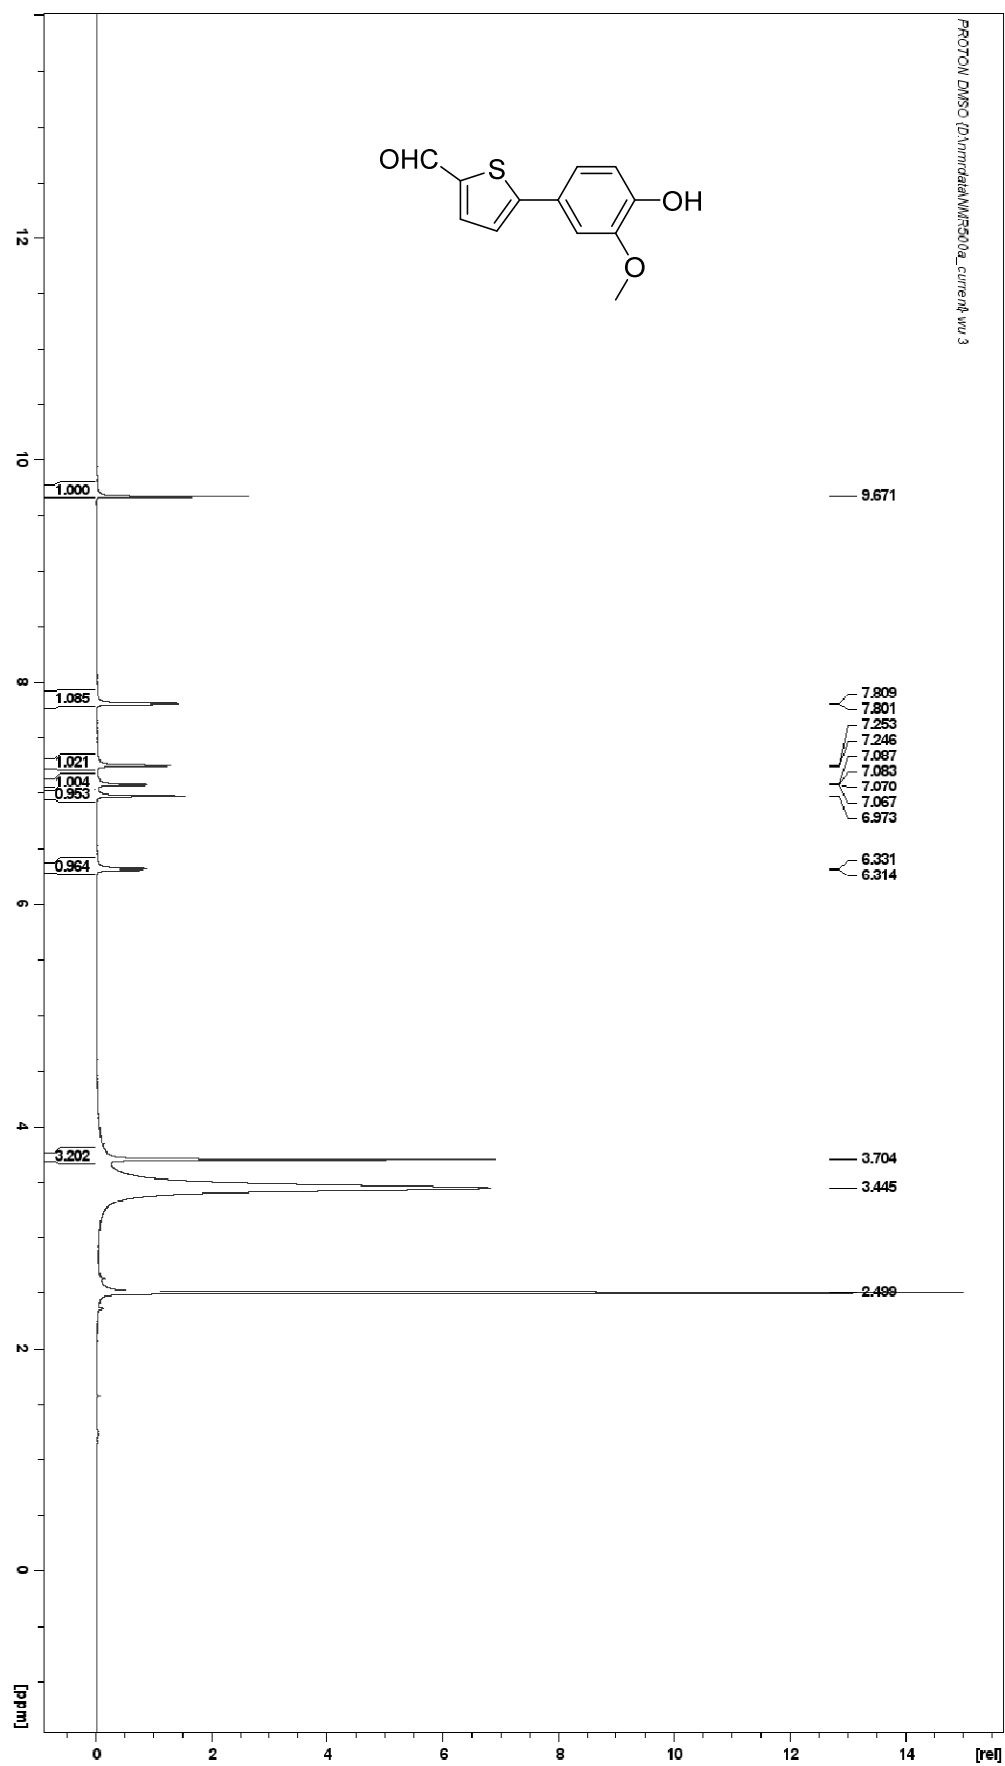

4OHC(O)HC(O)  
C13CFD.DMSO (D:\nrindard\MR507a\_surrcr) wu 3

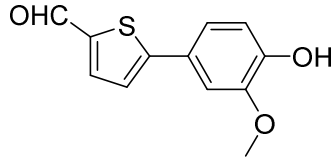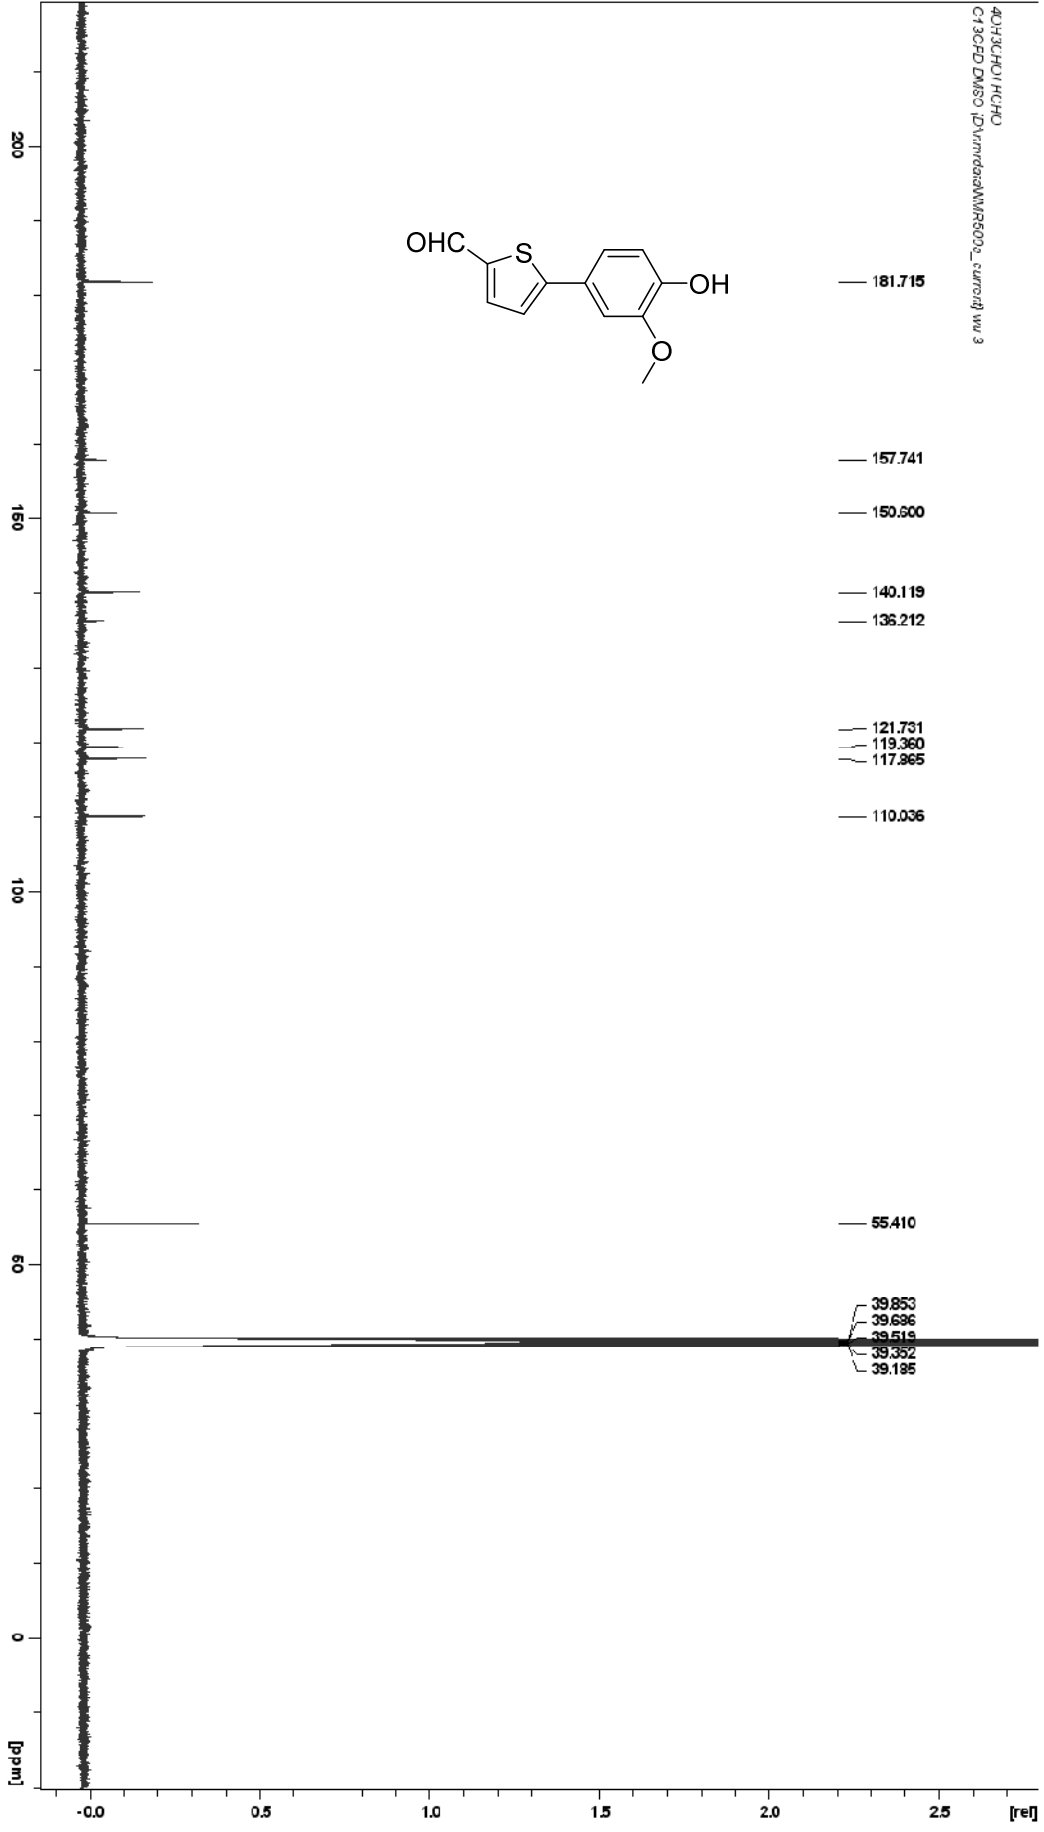

<sup>1</sup>H and <sup>13</sup>C-NMR of ligand HS-350:

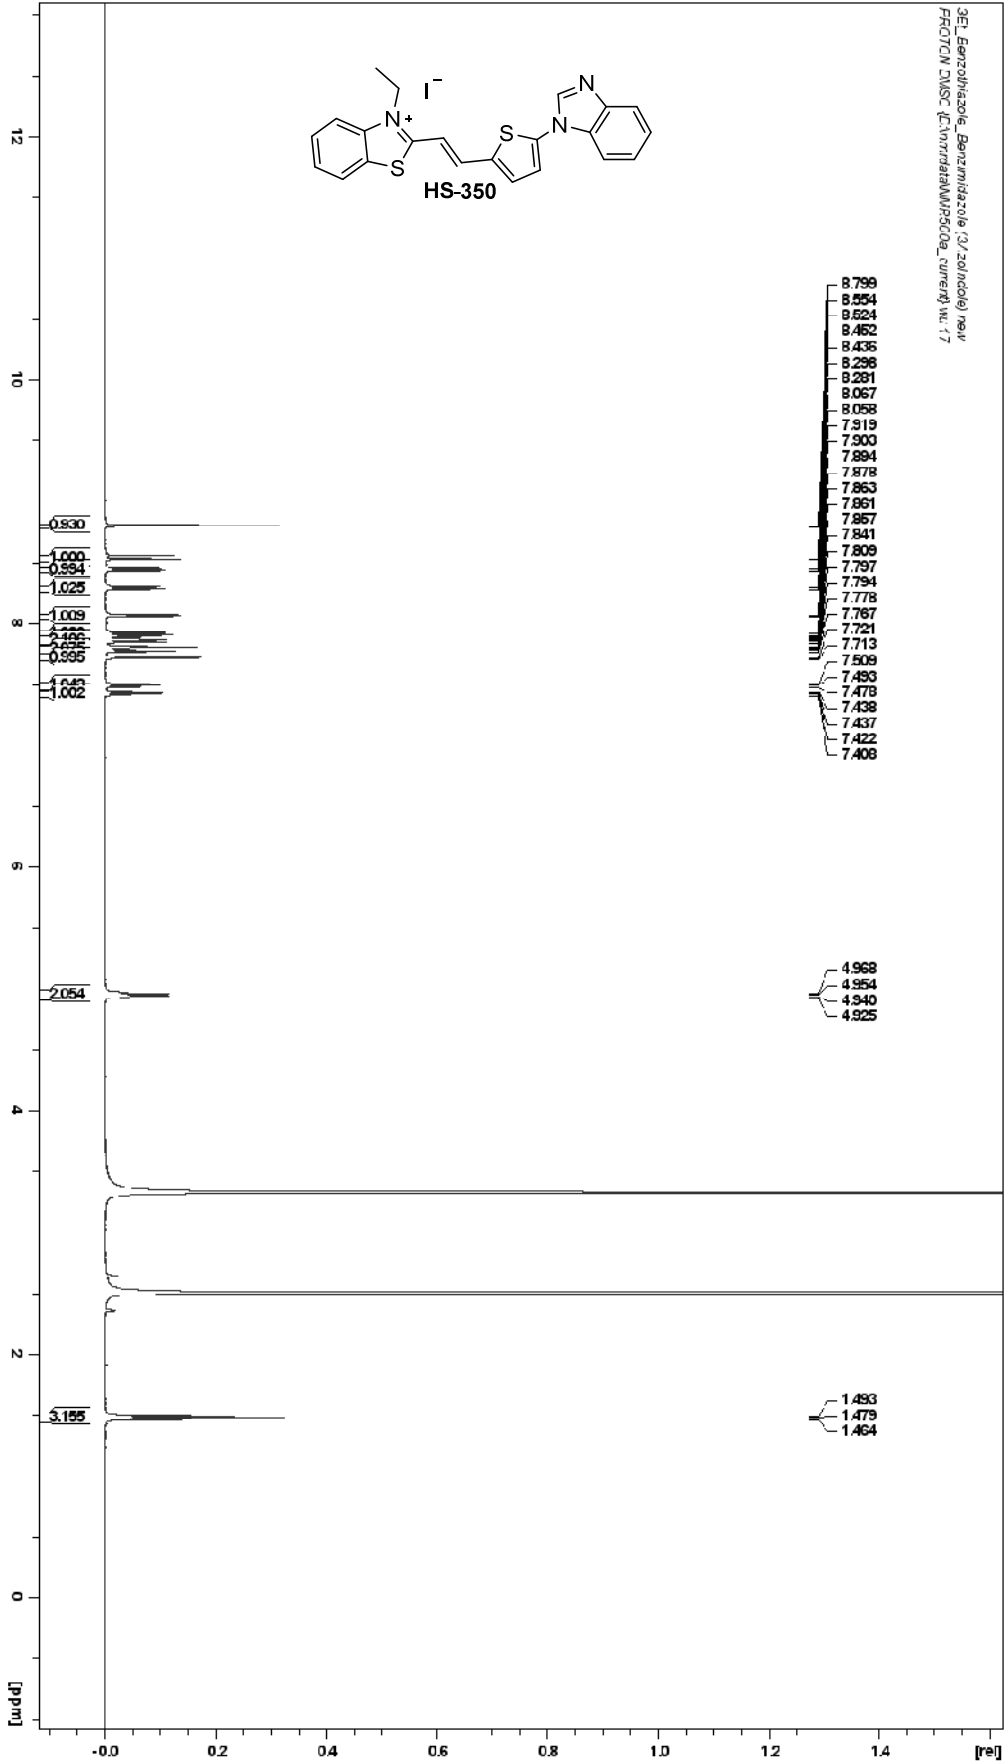

3E1\_Benzothiazole\_Benzimidazole (7:20/1000) neu  
C13CPD DMSO (Dimidatam/IR500a\_current) wu 17

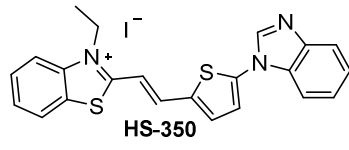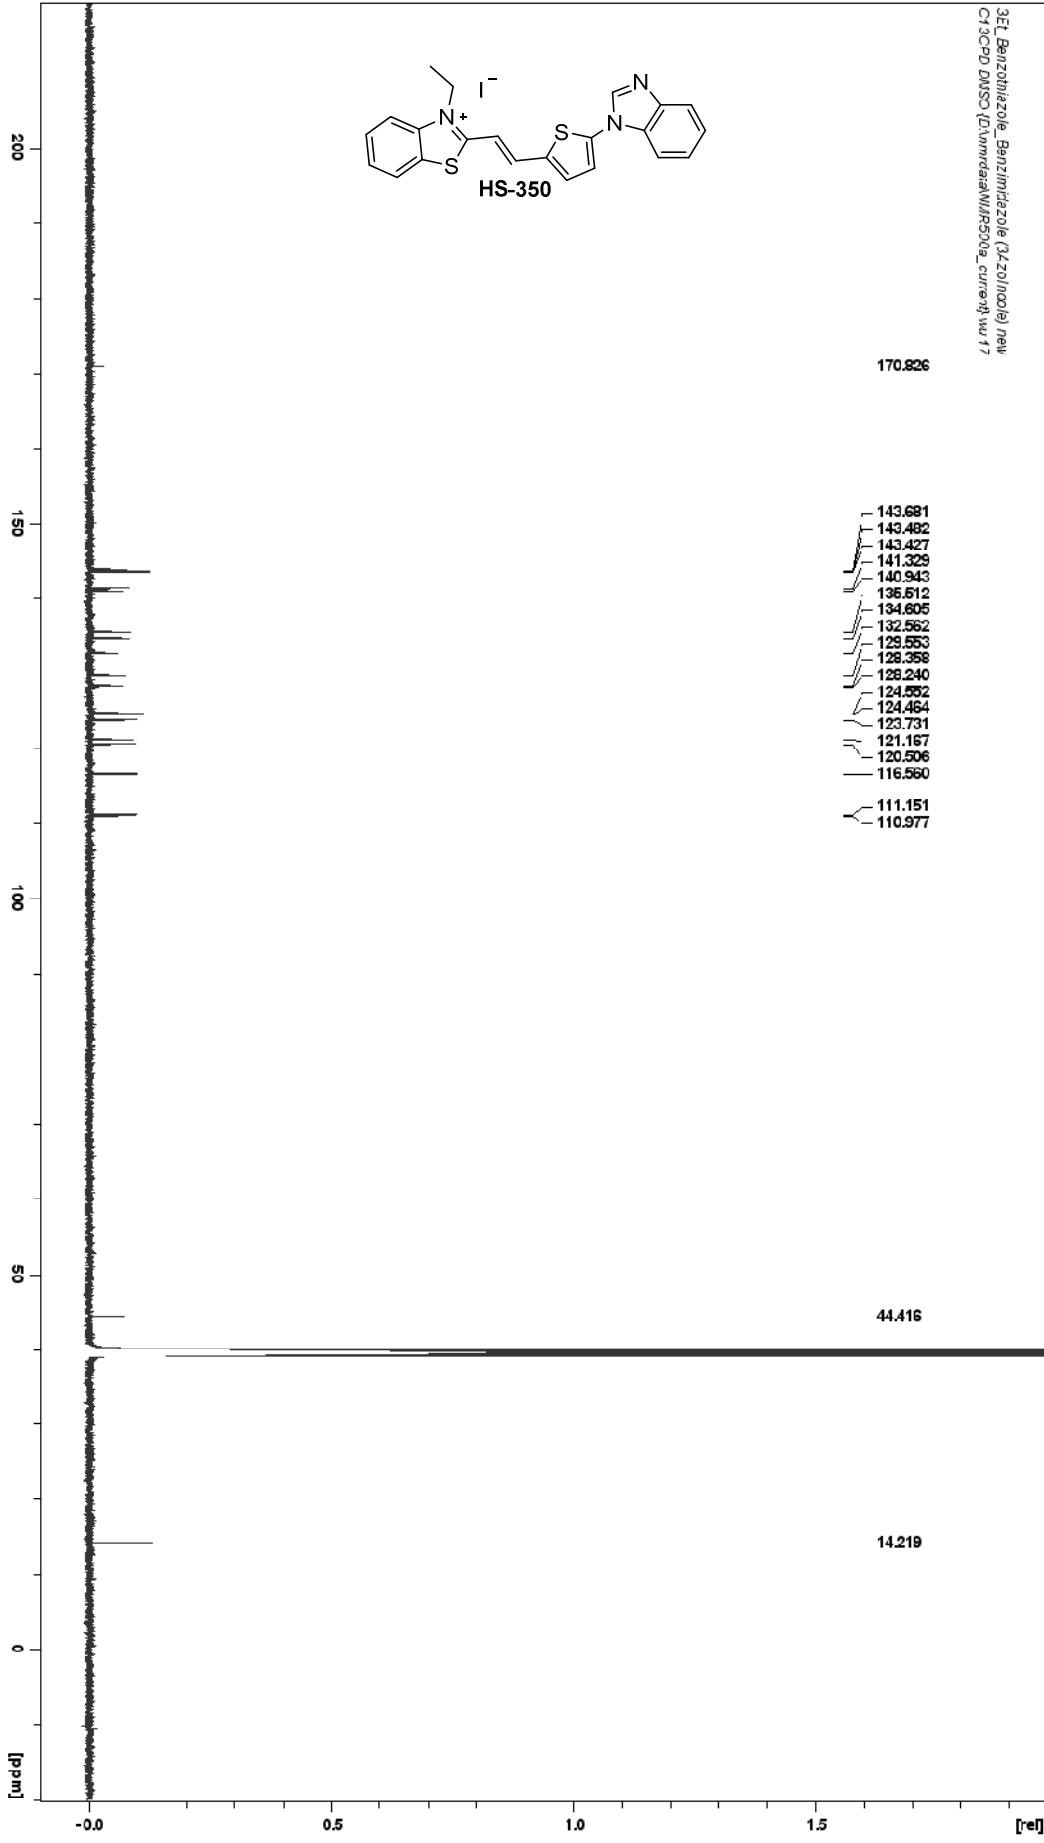



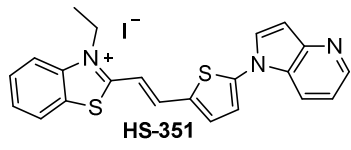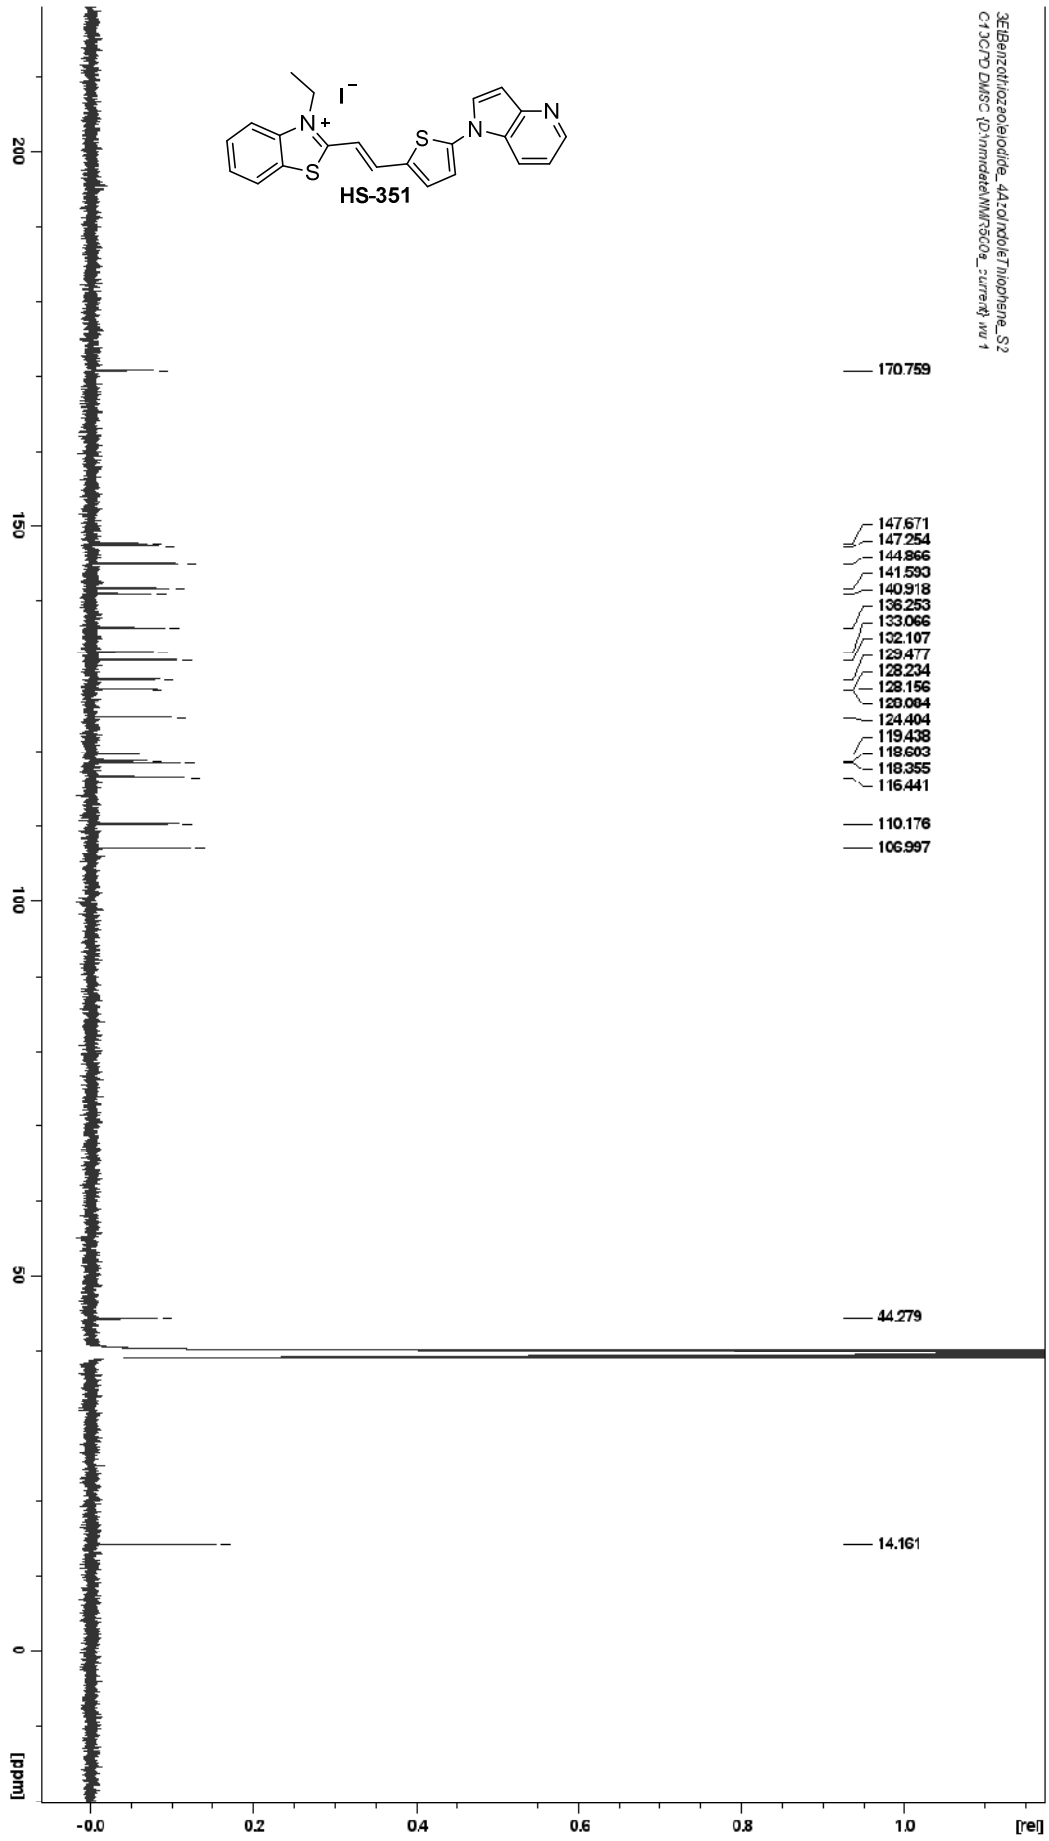

<sup>1</sup>H and <sup>13</sup>C-NMR of ligand HS-352:

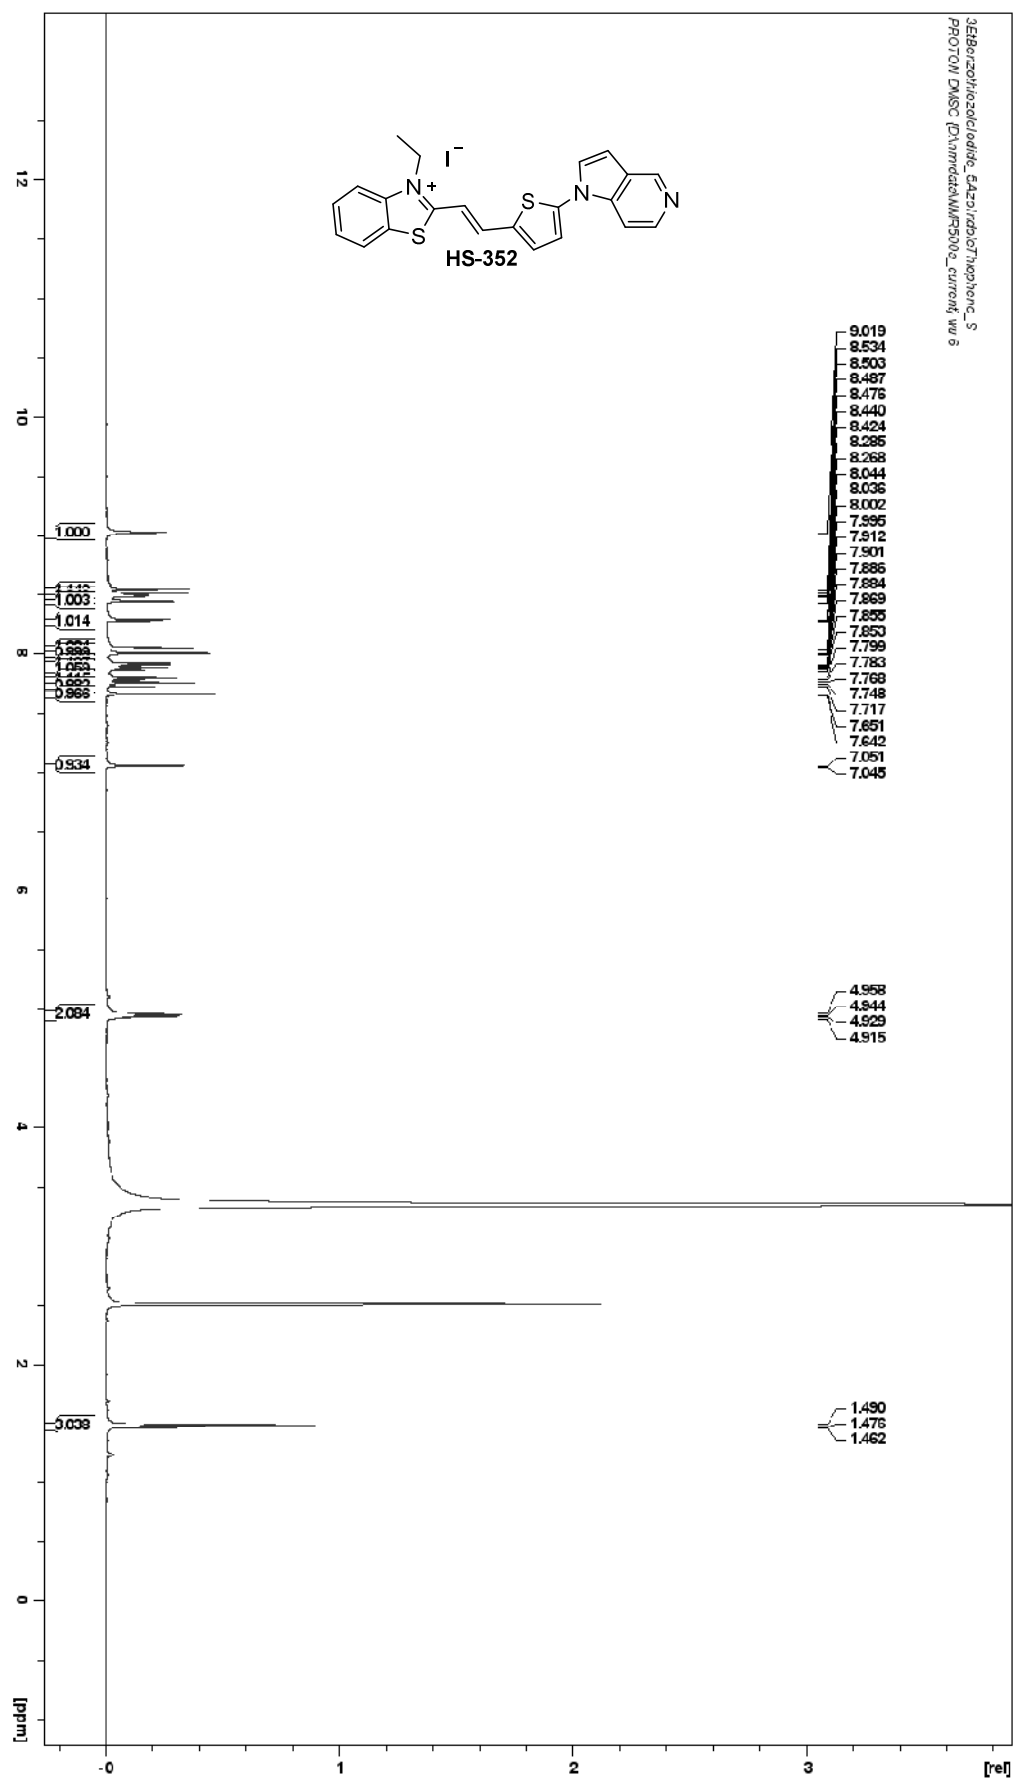



SEBenzothiazole, 5-azolothiophene, 3  
C13CPN NMSO D11underaMIP071a\_curren1.wu/6

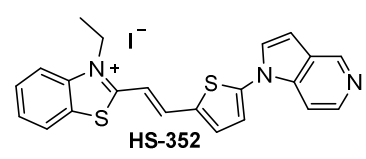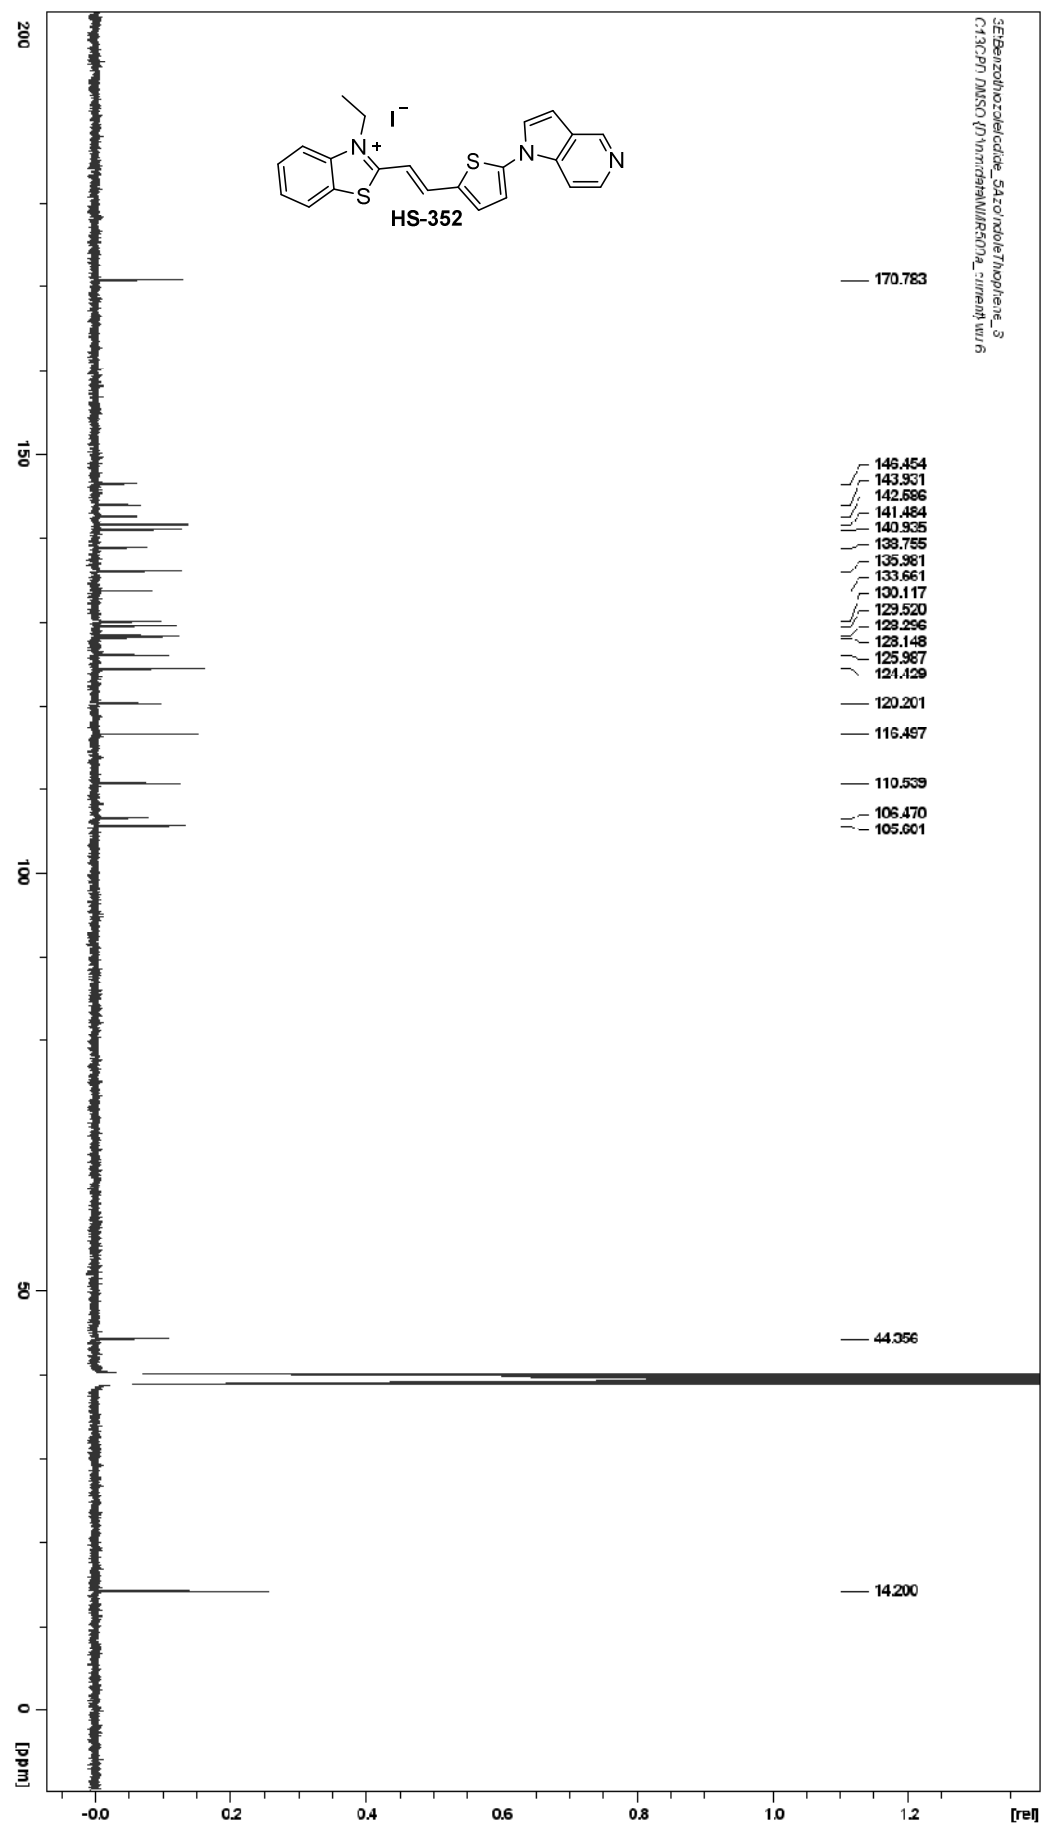

<sup>1</sup>H and <sup>13</sup>C-NMR of ligand HS-353:

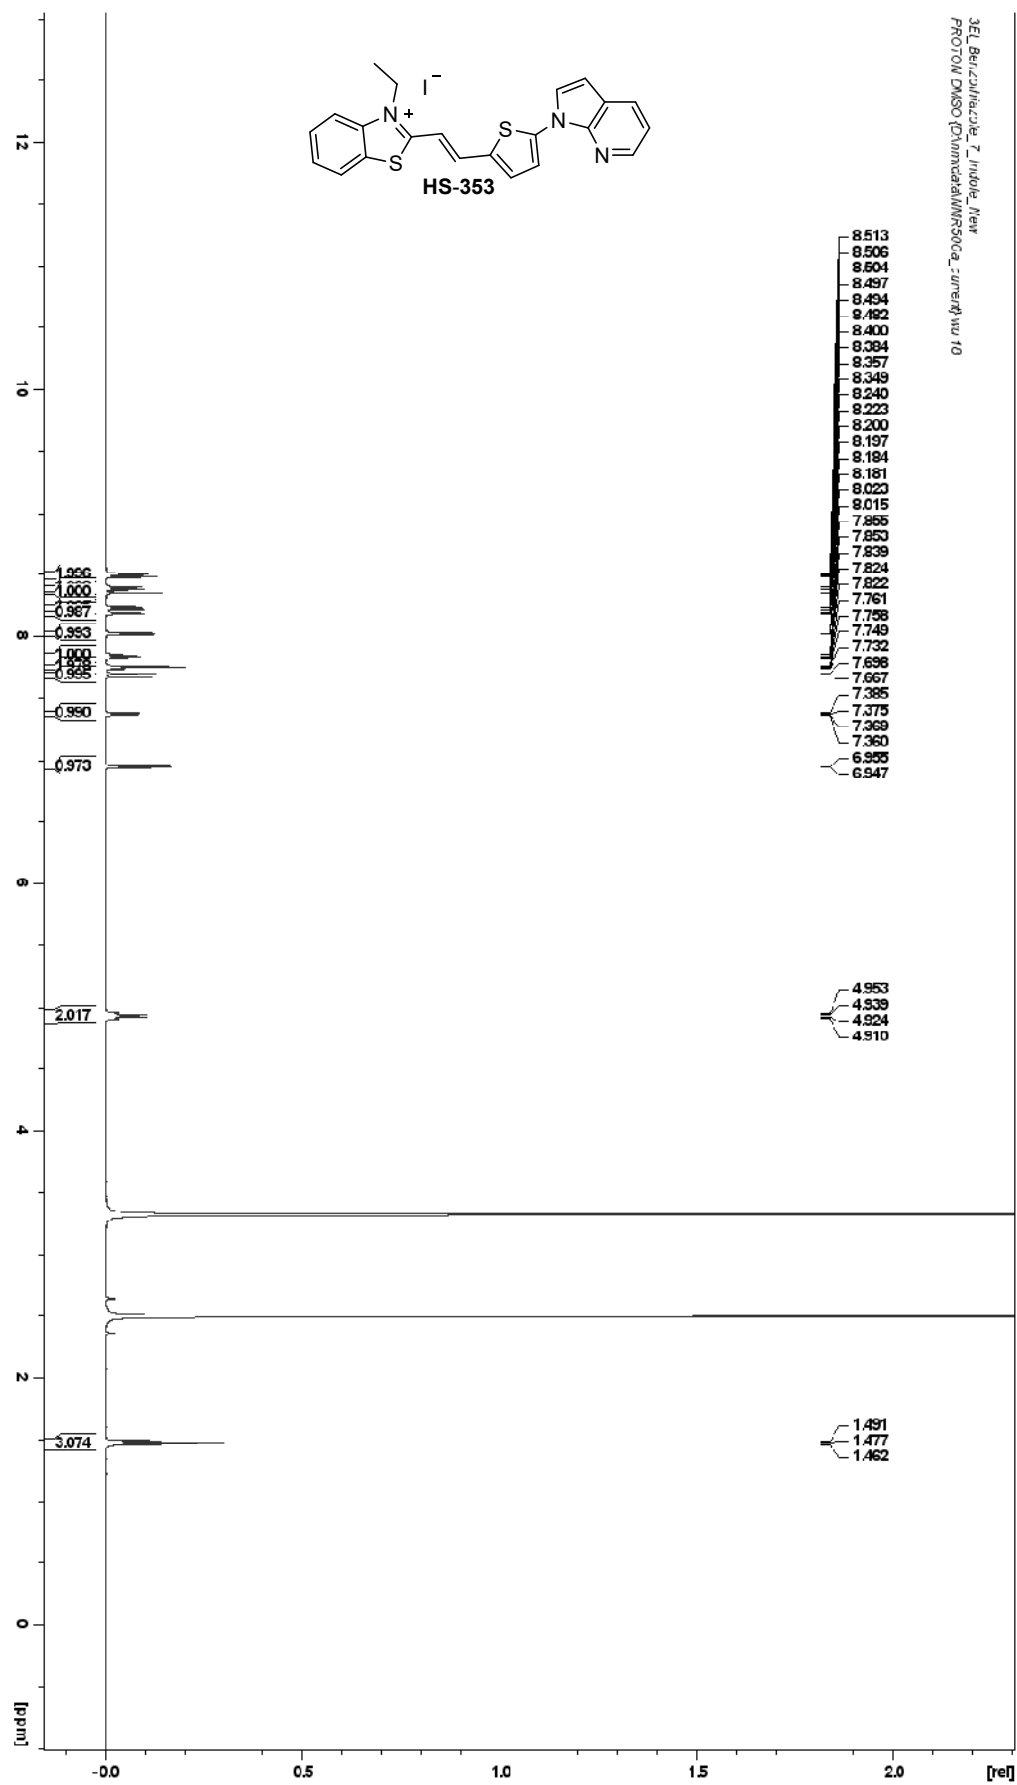

3ET Benzothiazole 7 Indole Nitr  
C13CPD.DMSO (DumradaradMMR500q\_surren) wu 78

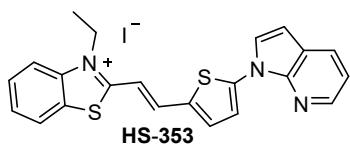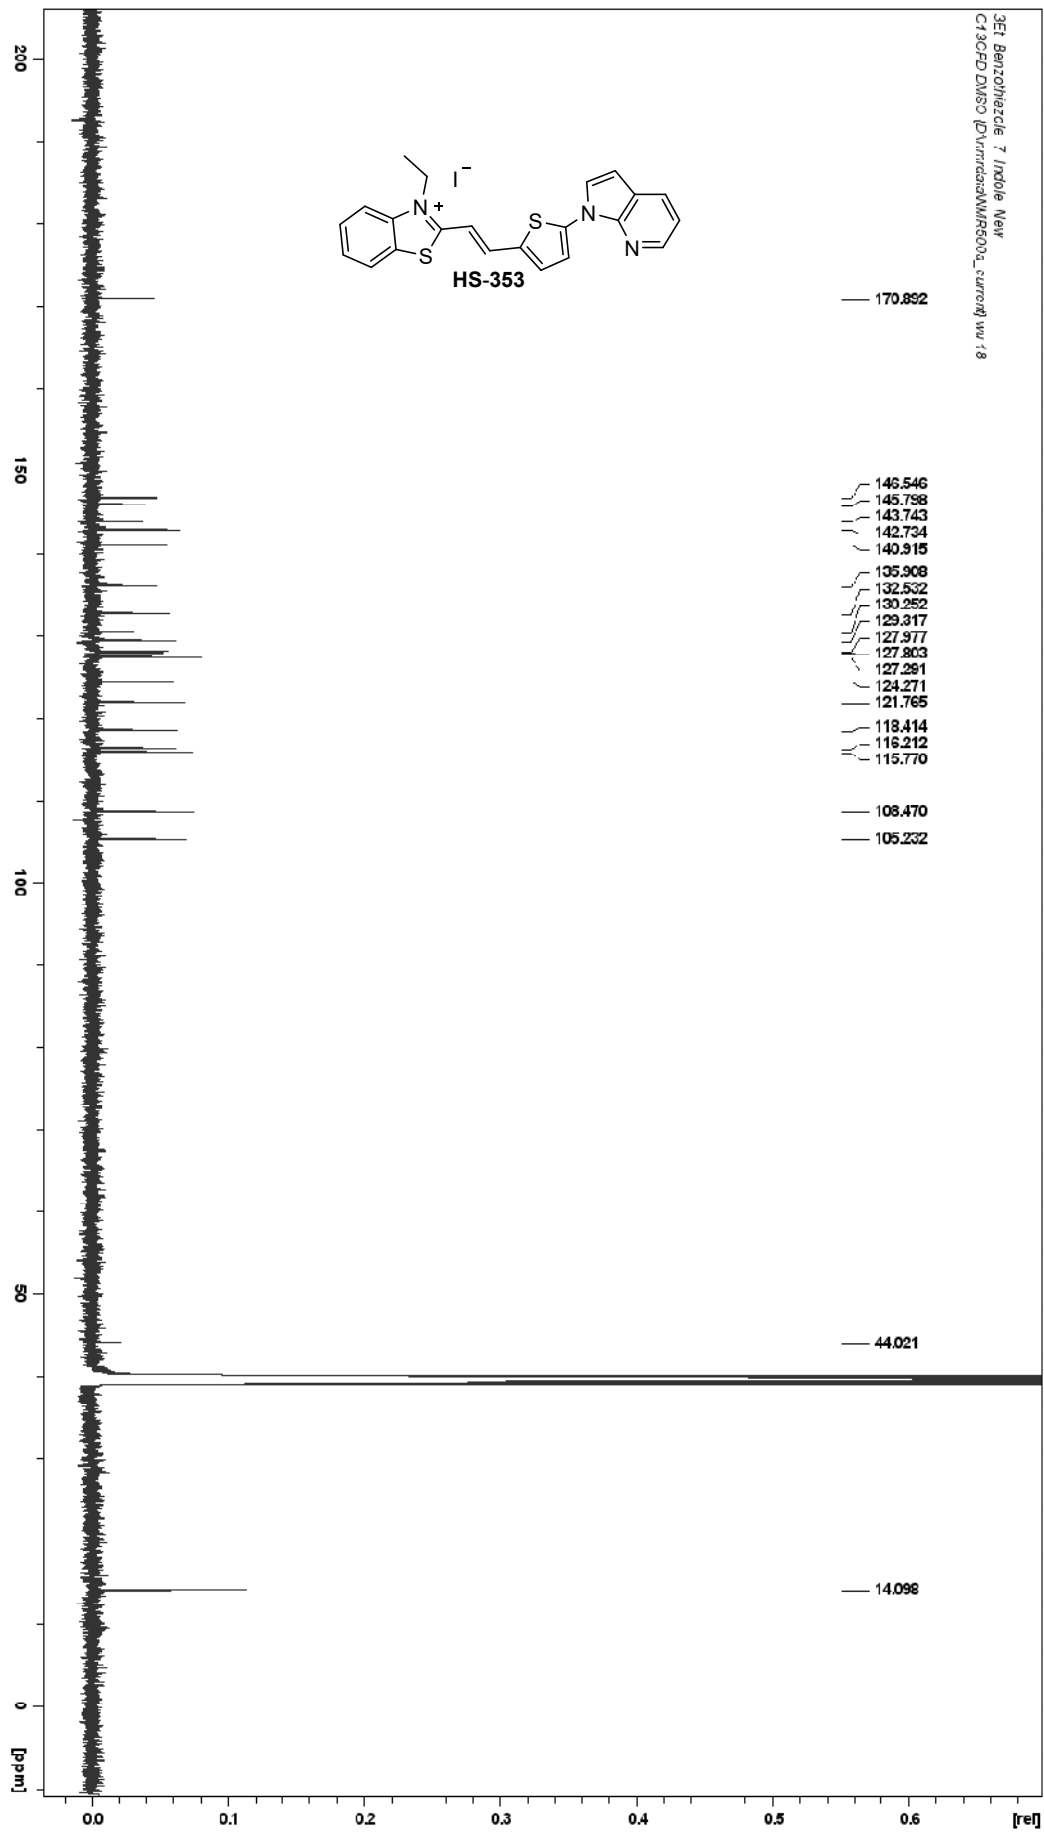

$^1\text{H}$  and  $^{13}\text{C}$ -NMR of ligand HS-354:

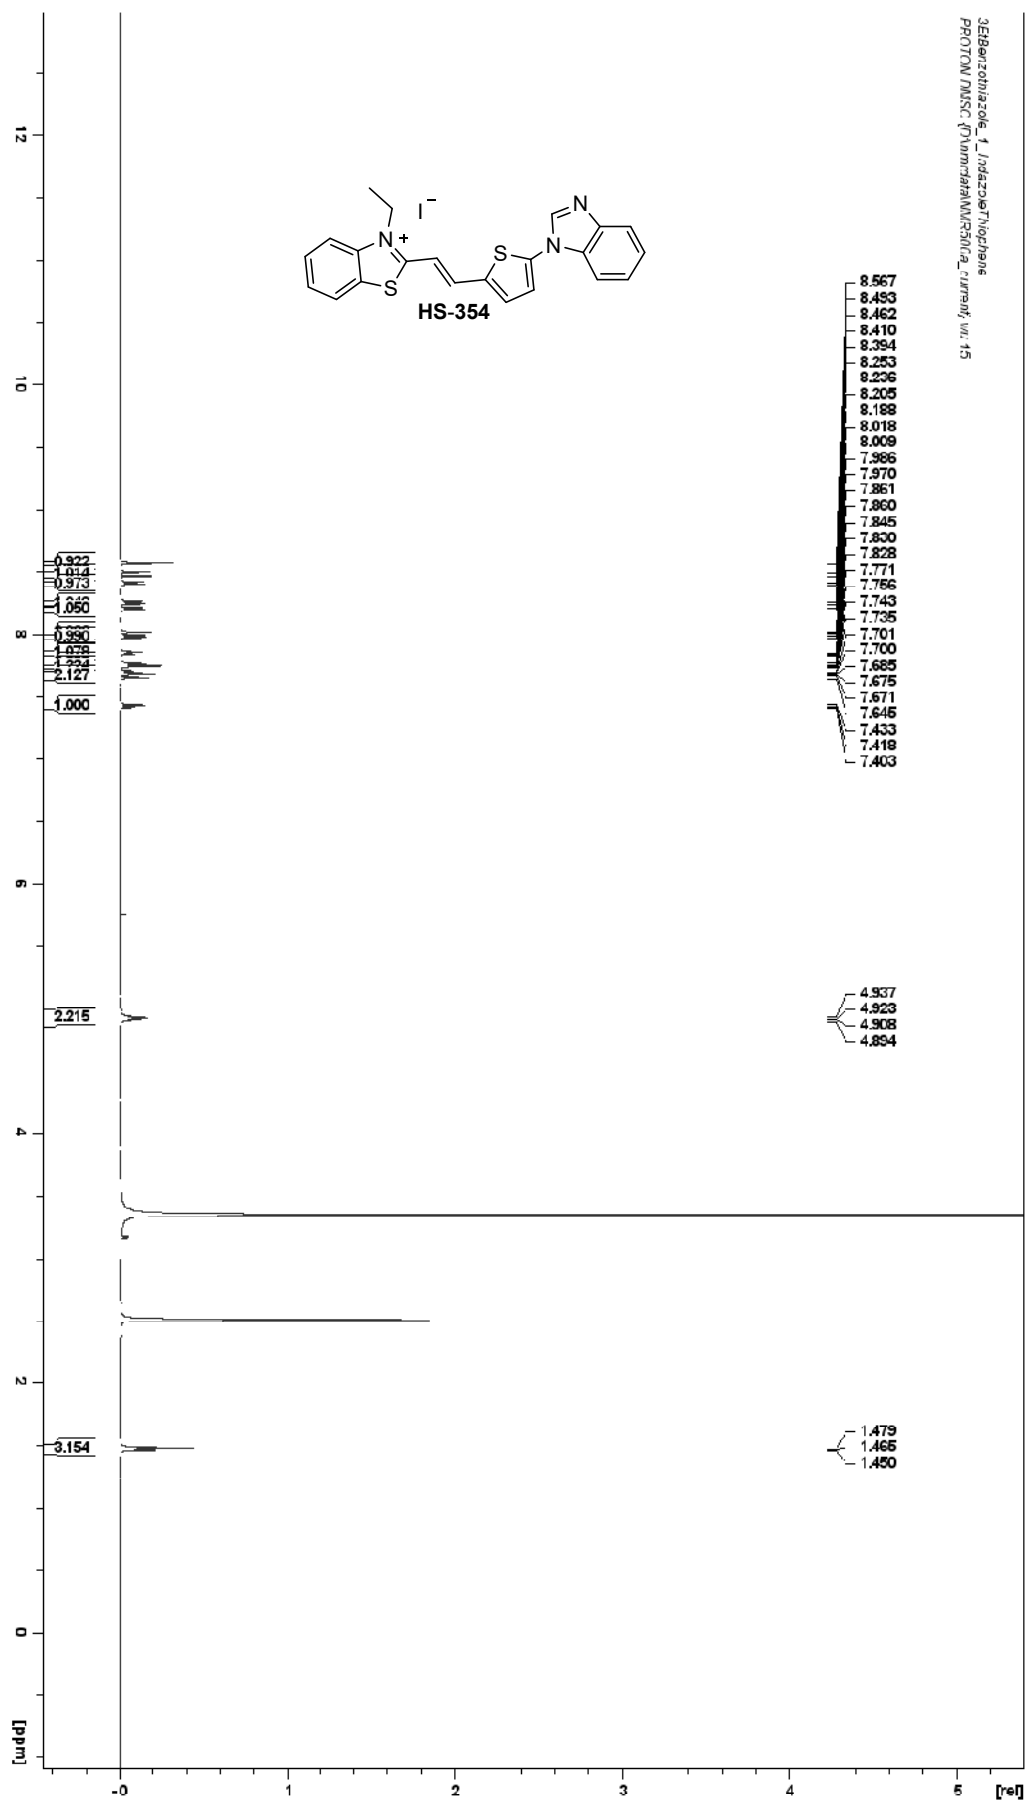

5E-Benzothiazole\_4-Indazole-Thiophene  
C13CPD.DMSO-d6.VMPC08A.VMPC09A\_current.vw.13

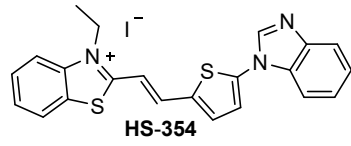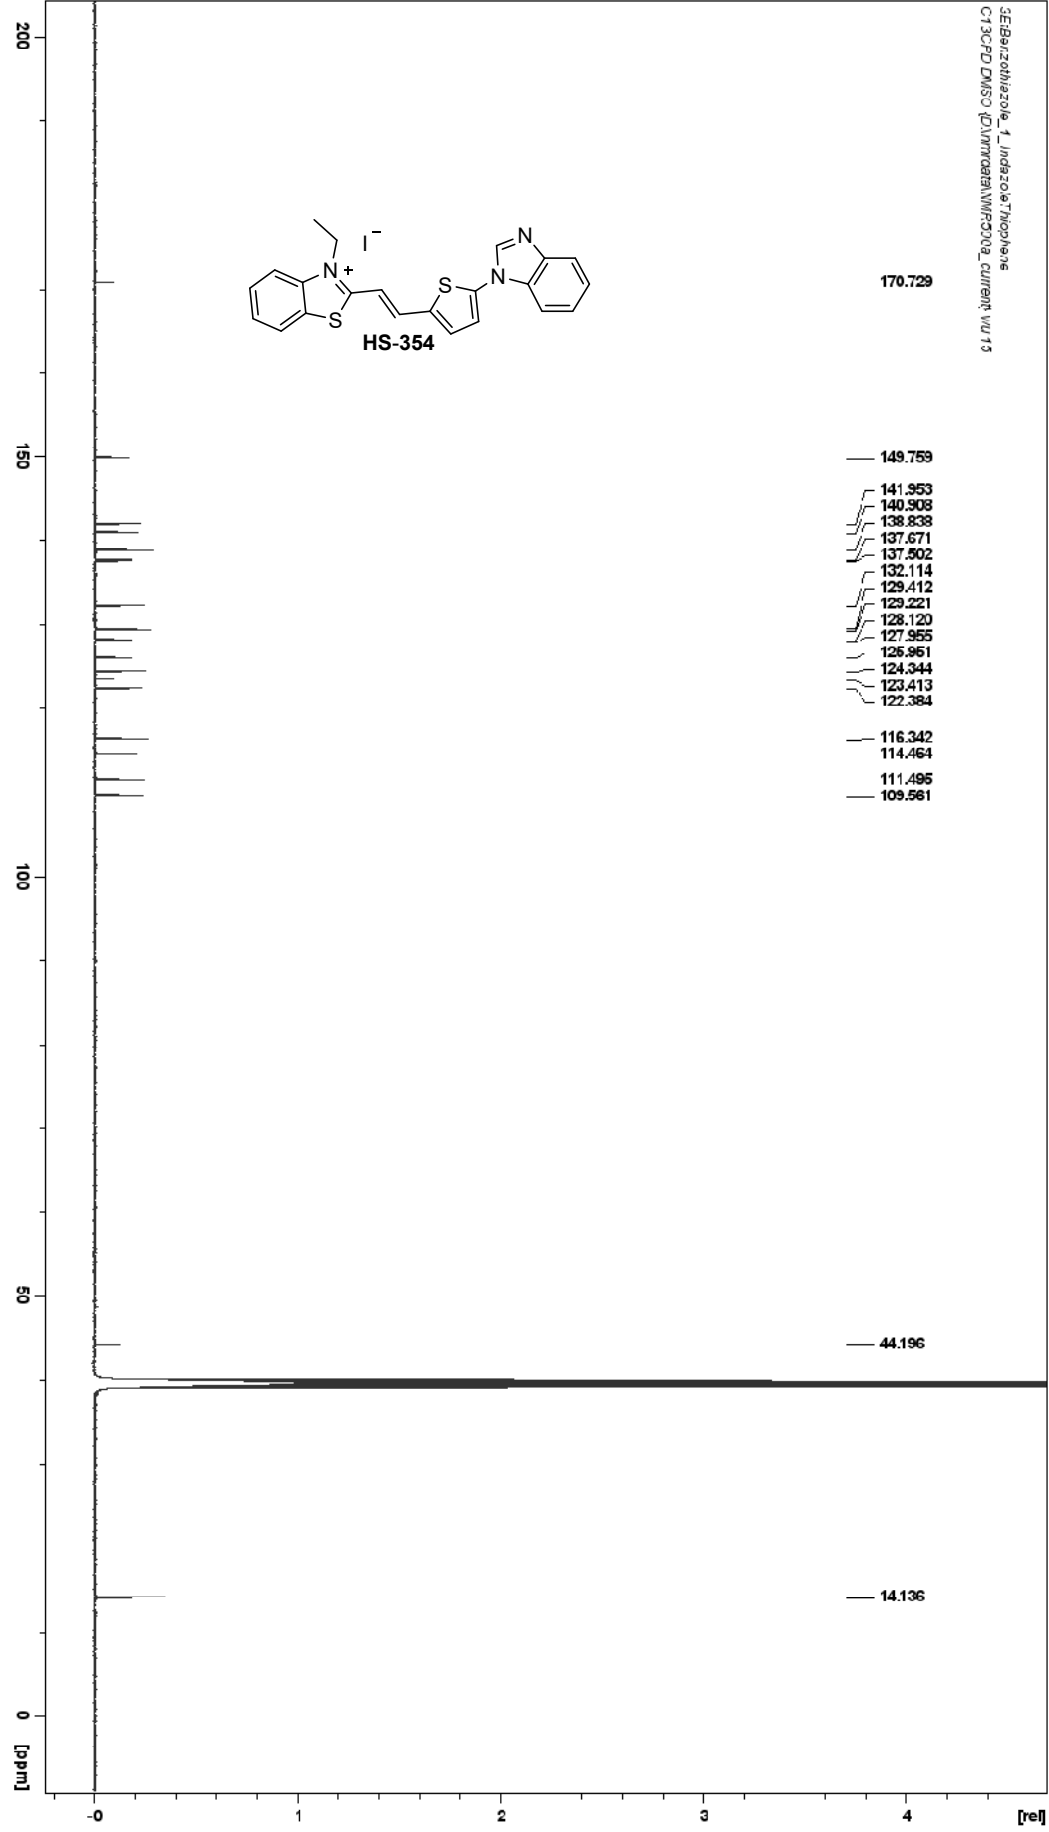

$^1\text{H}$  and  $^{13}\text{C}$ -NMR of ligand HS-355:

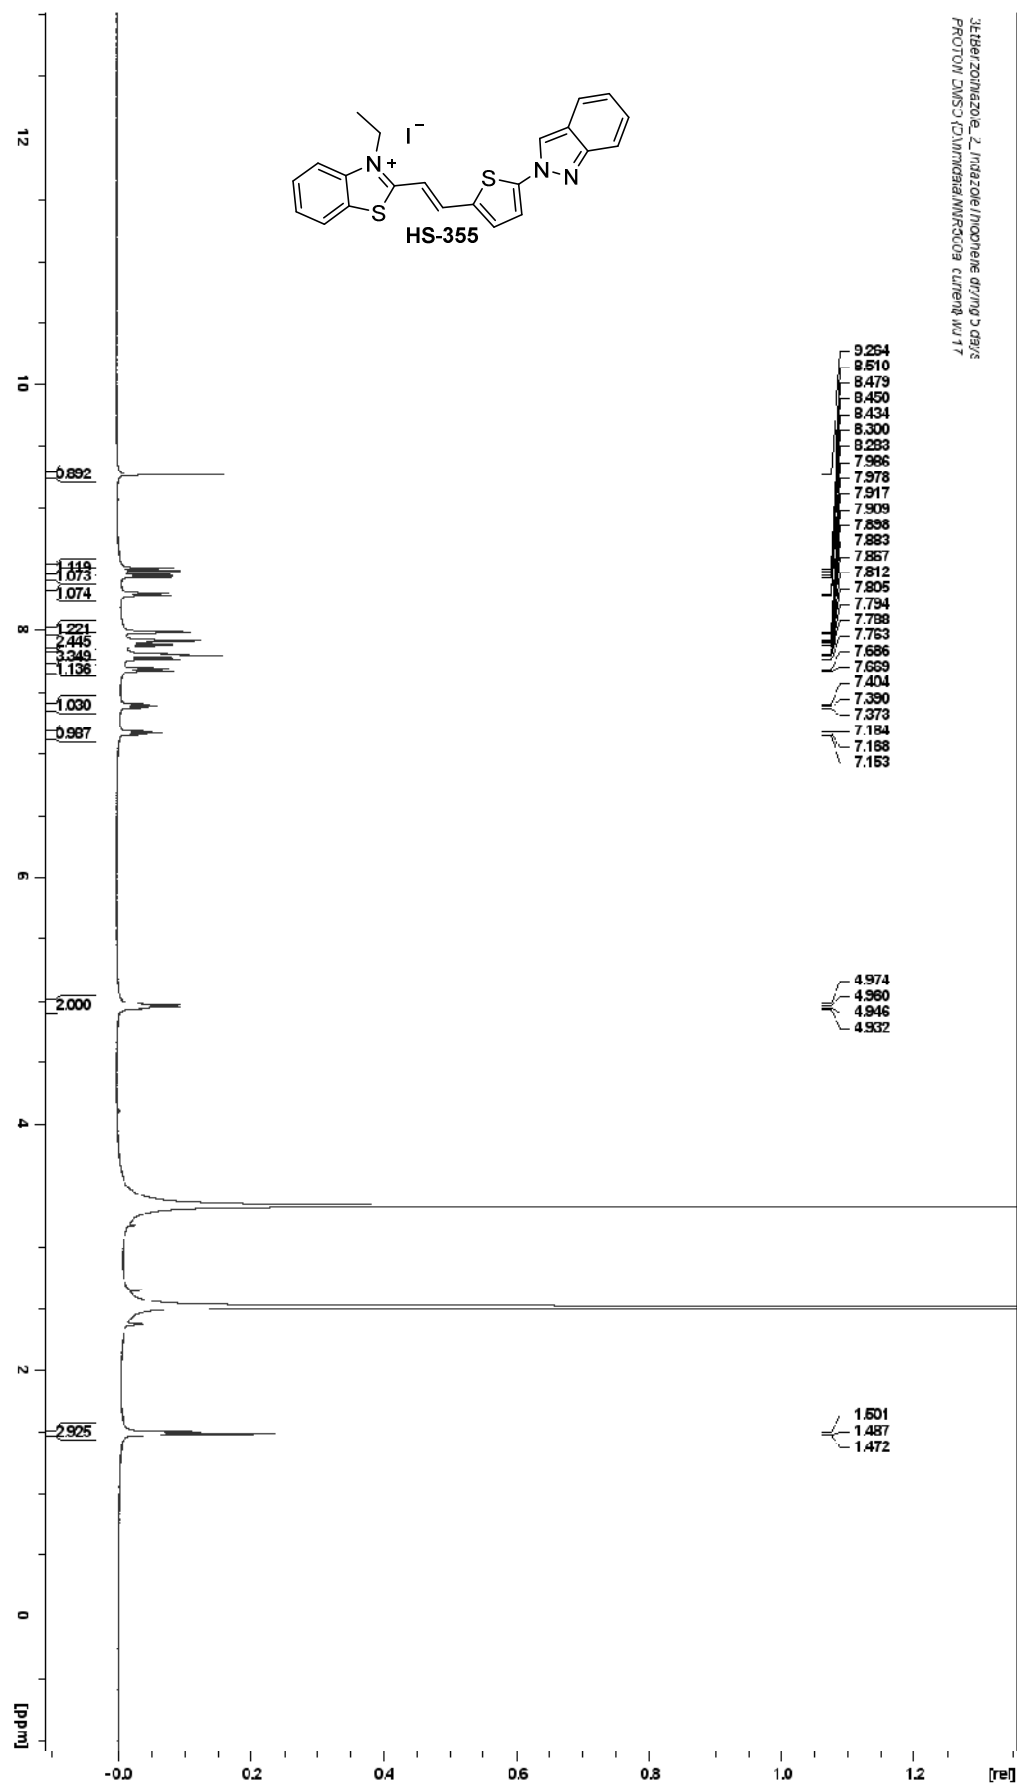

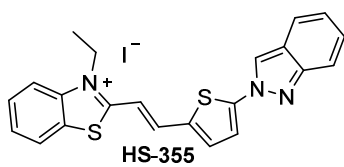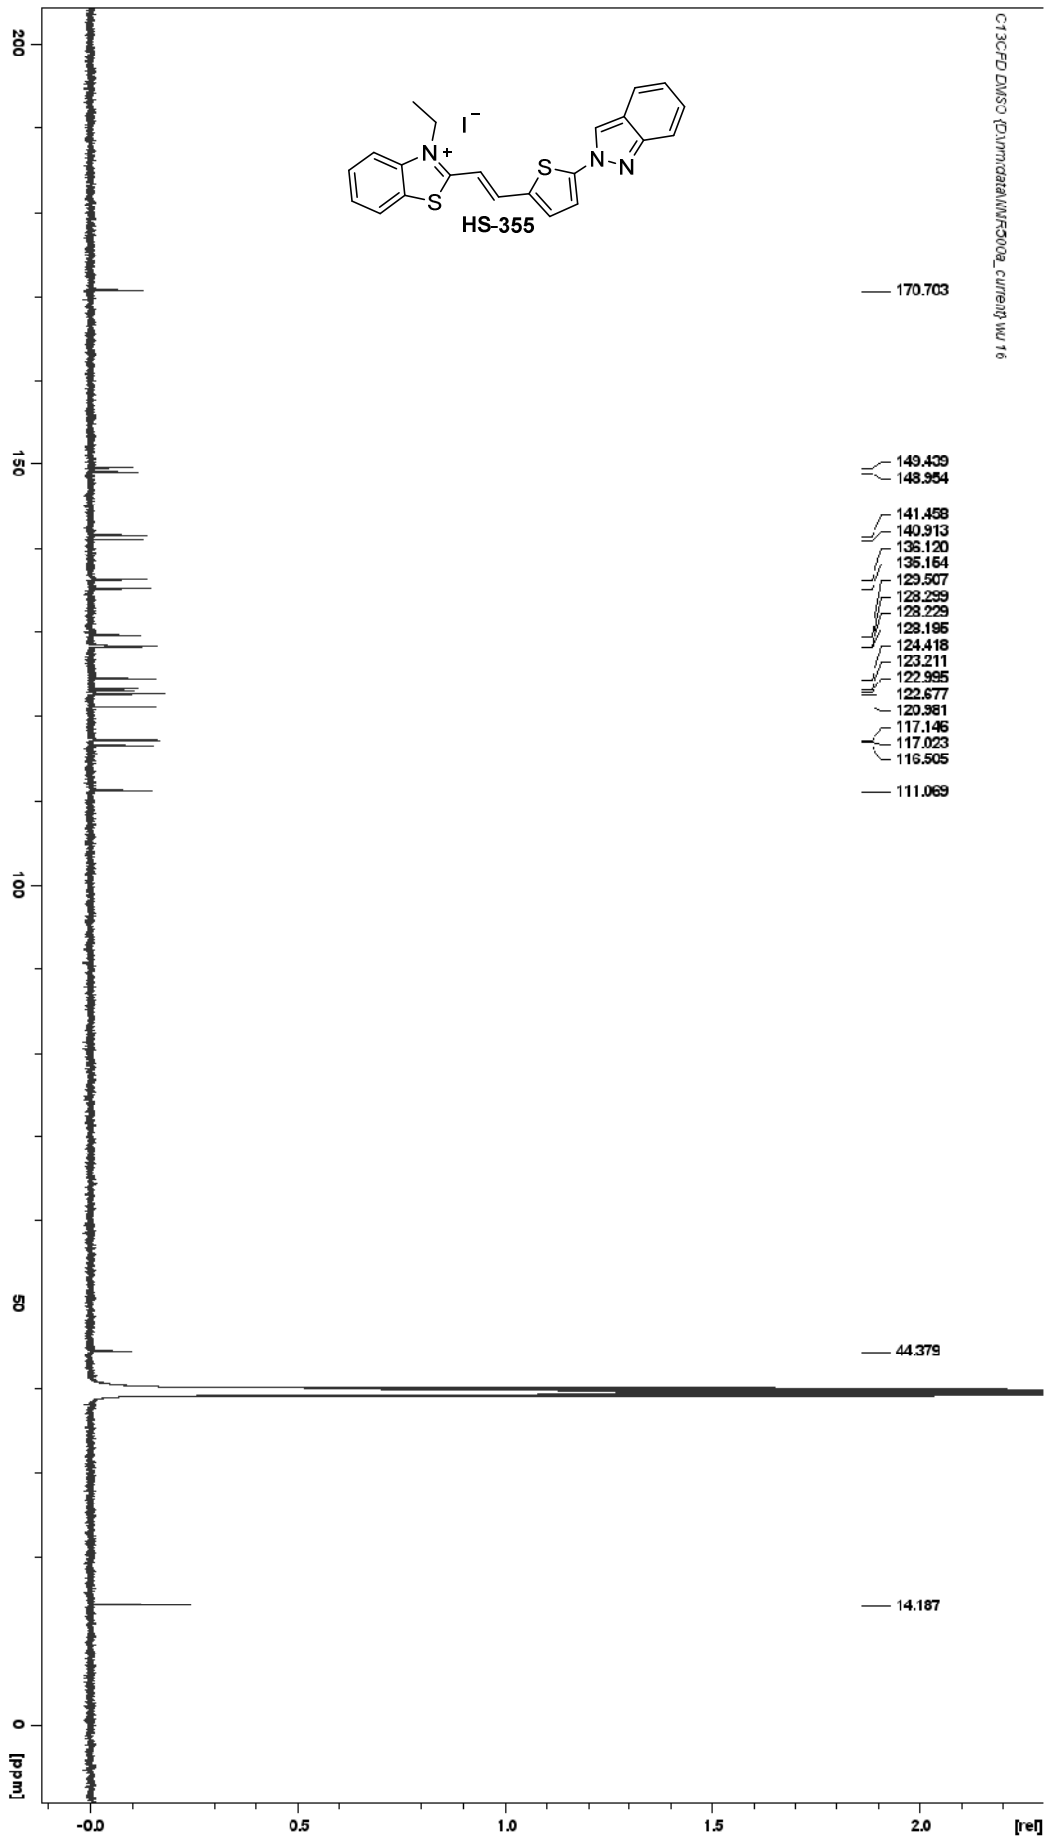

$^1\text{H}$  and  $^{13}\text{C}$ -NMR of ligand HS-356:

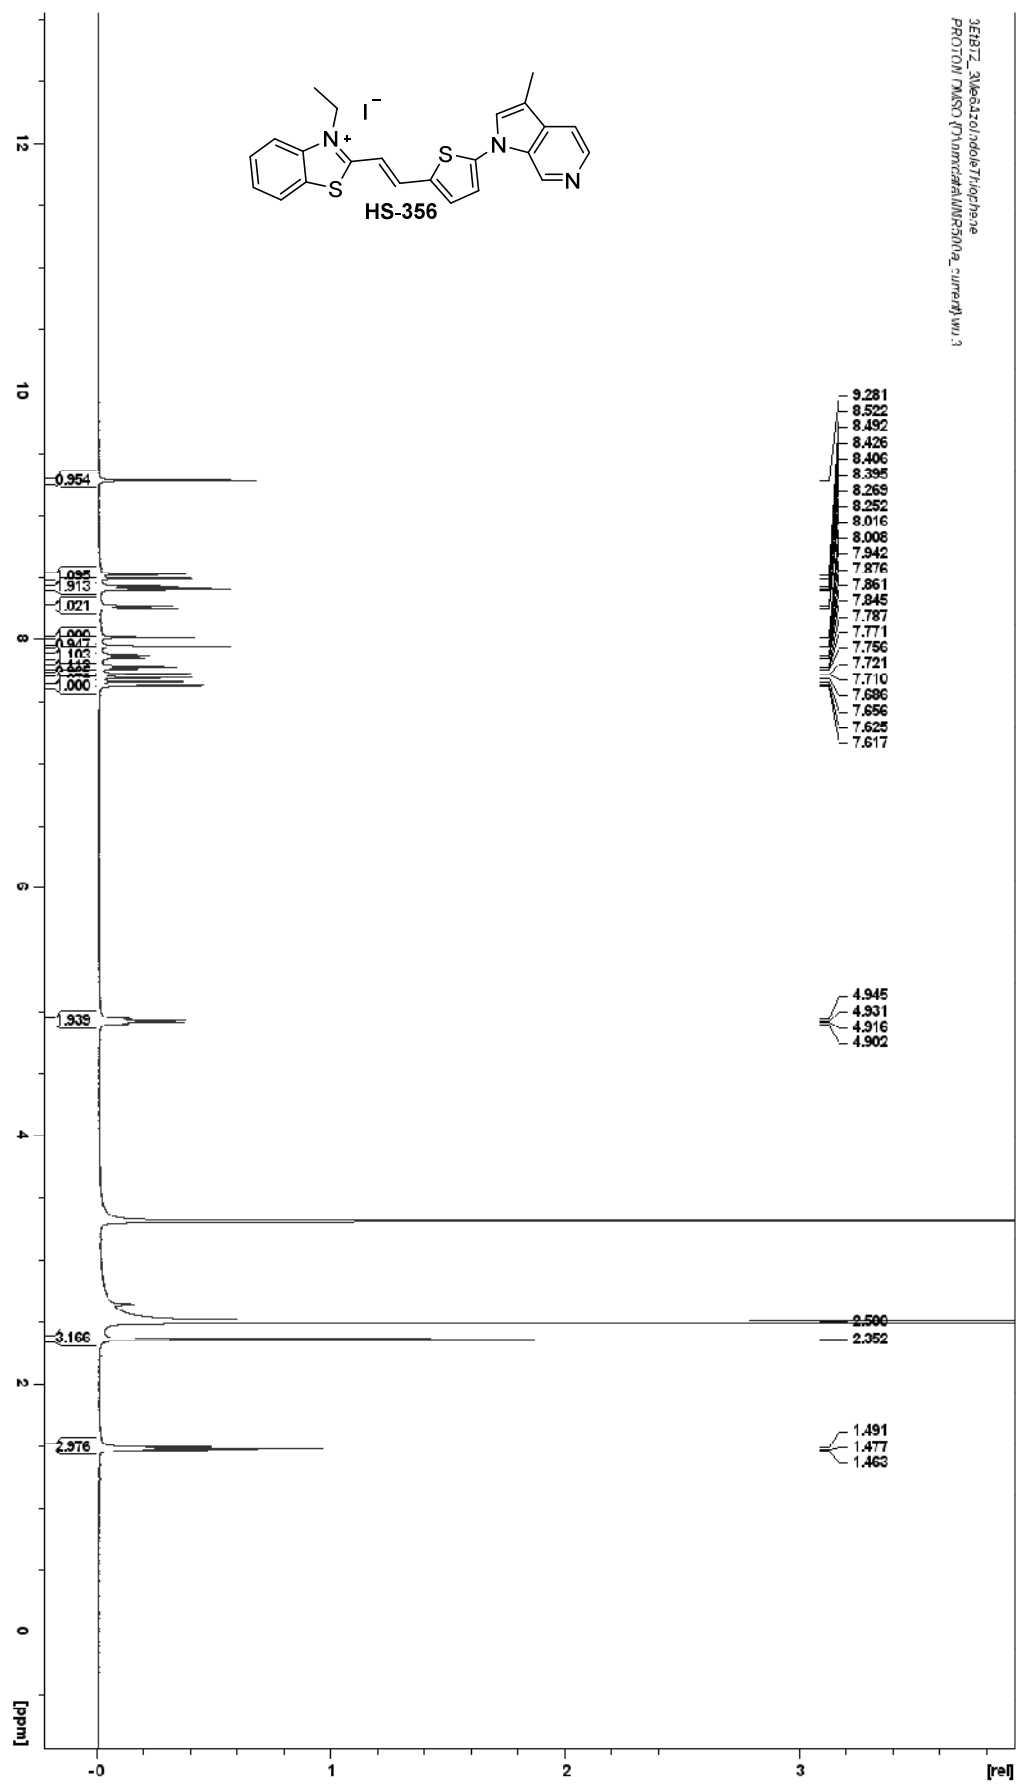



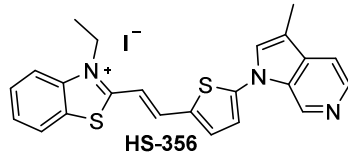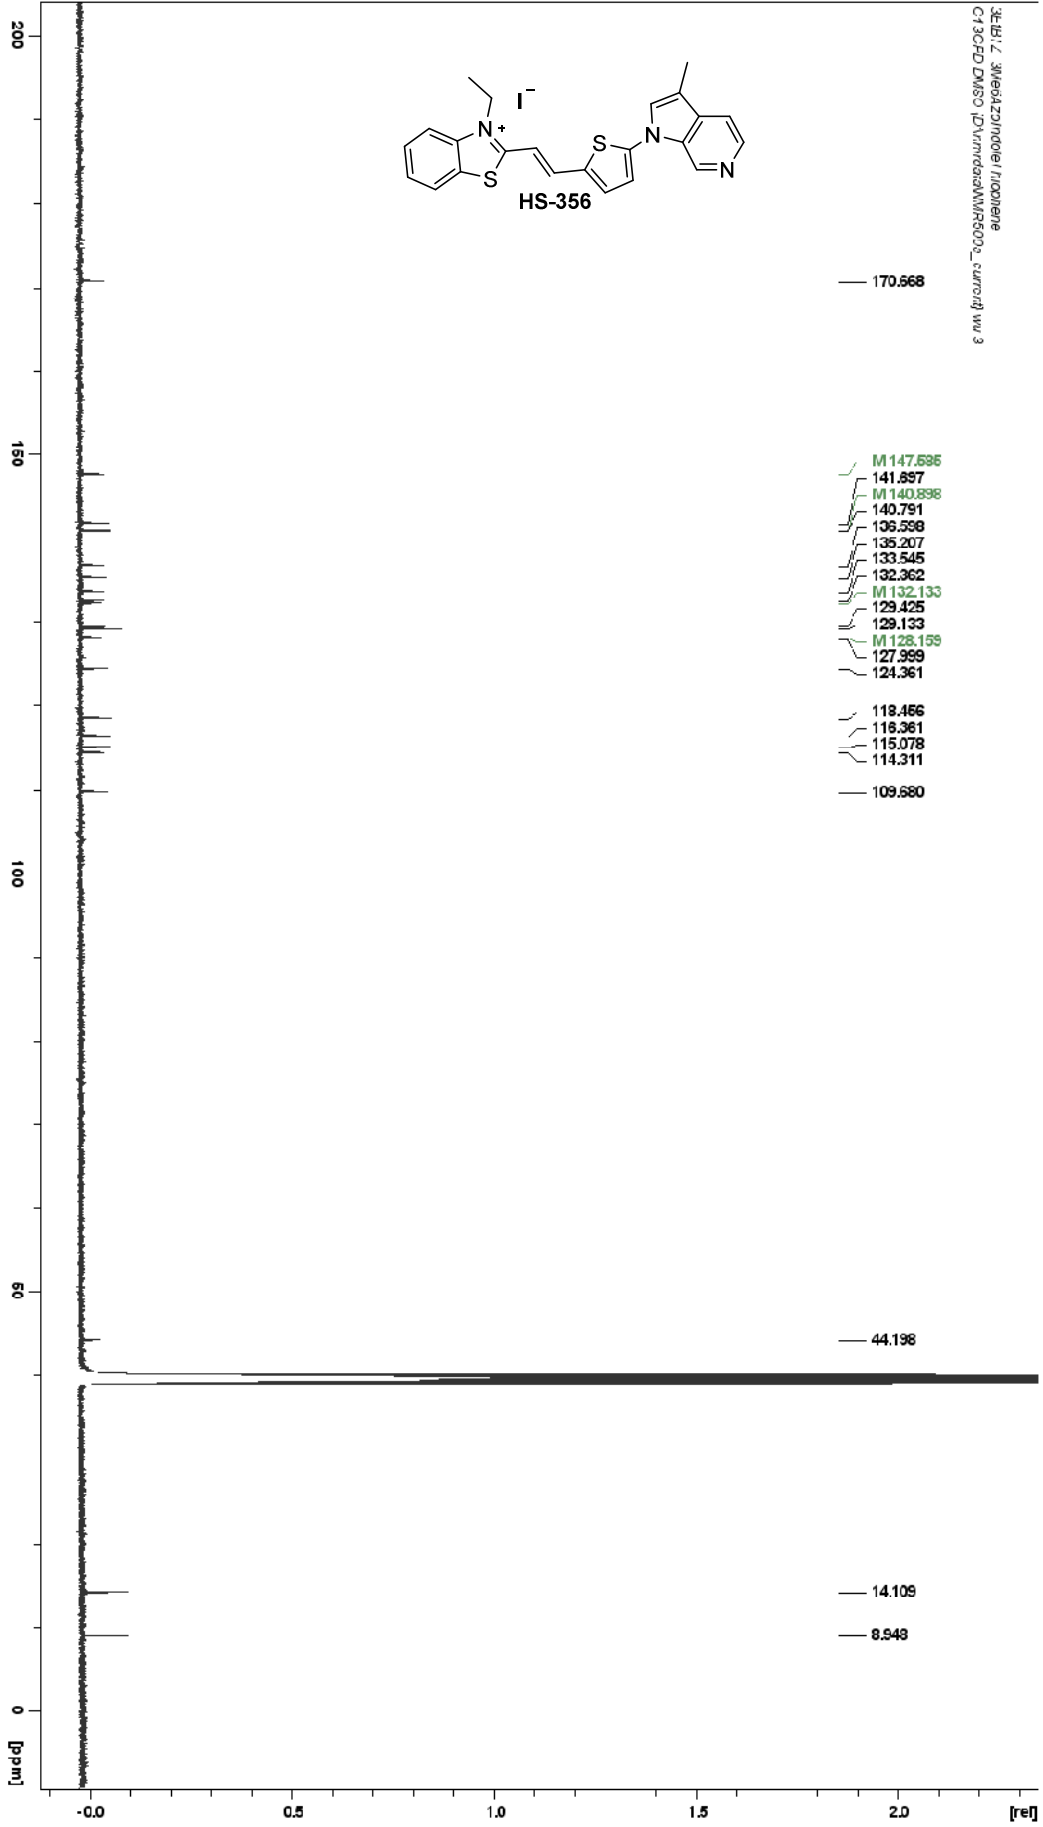

<sup>1</sup>H and <sup>13</sup>C-NMR of ligand HS-357:

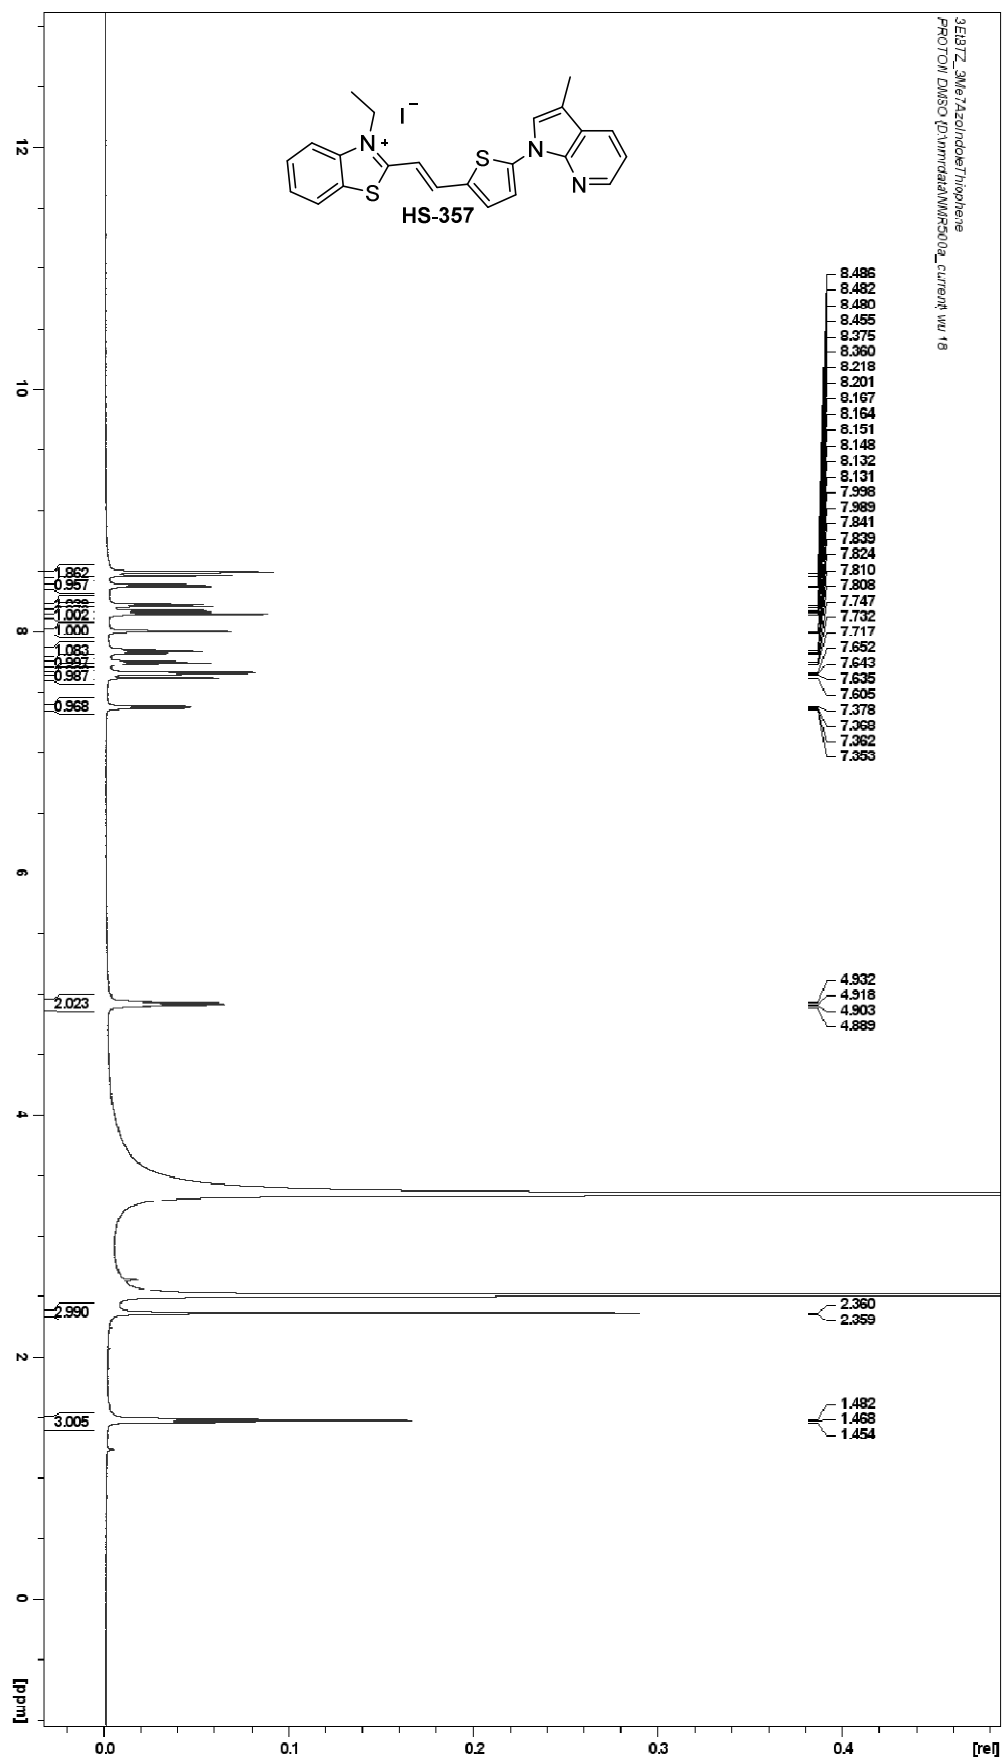

3EBITZ\_3MS7AzoliodoleThiophene  
C13CD3 DMSO-d6 (Dumppesaki/M/RS00a\_current) nu 18

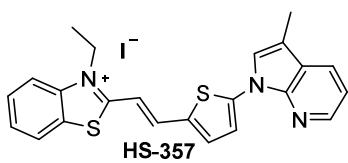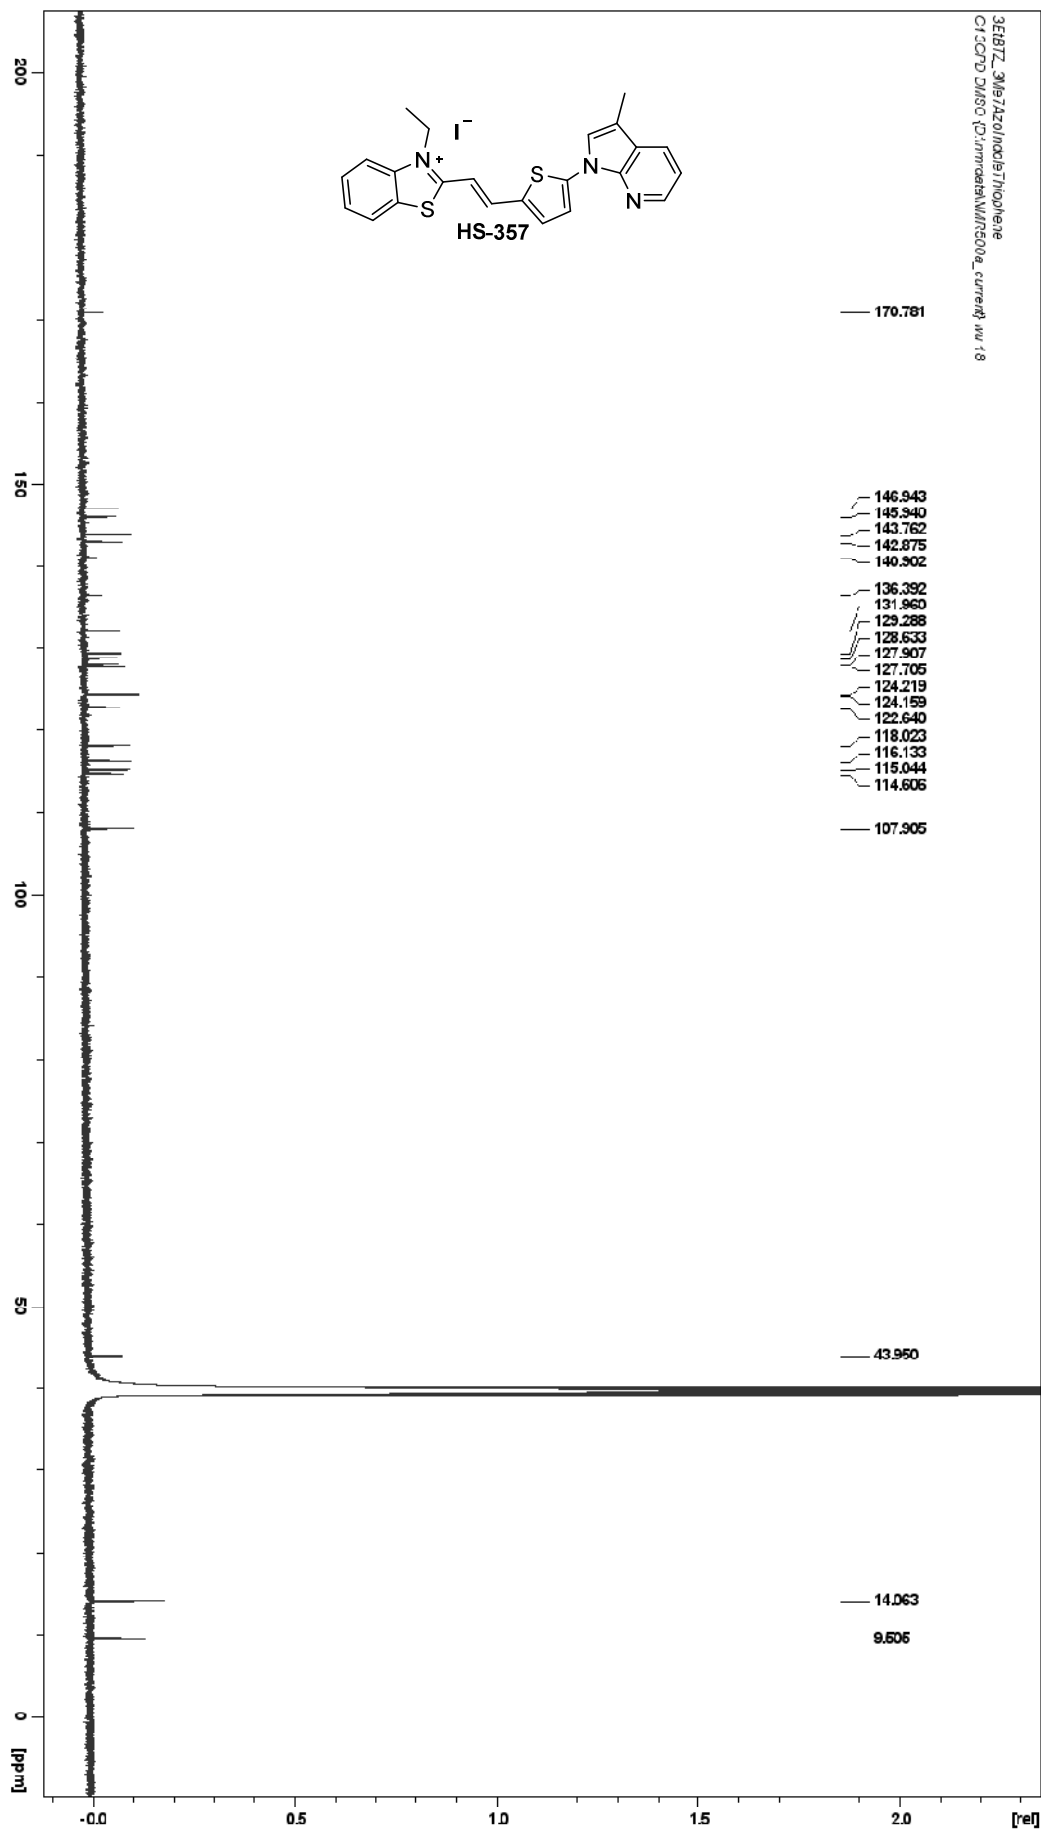

$^1\text{H}$  and  $^{13}\text{C}$ -NMR of ligand HS-358:

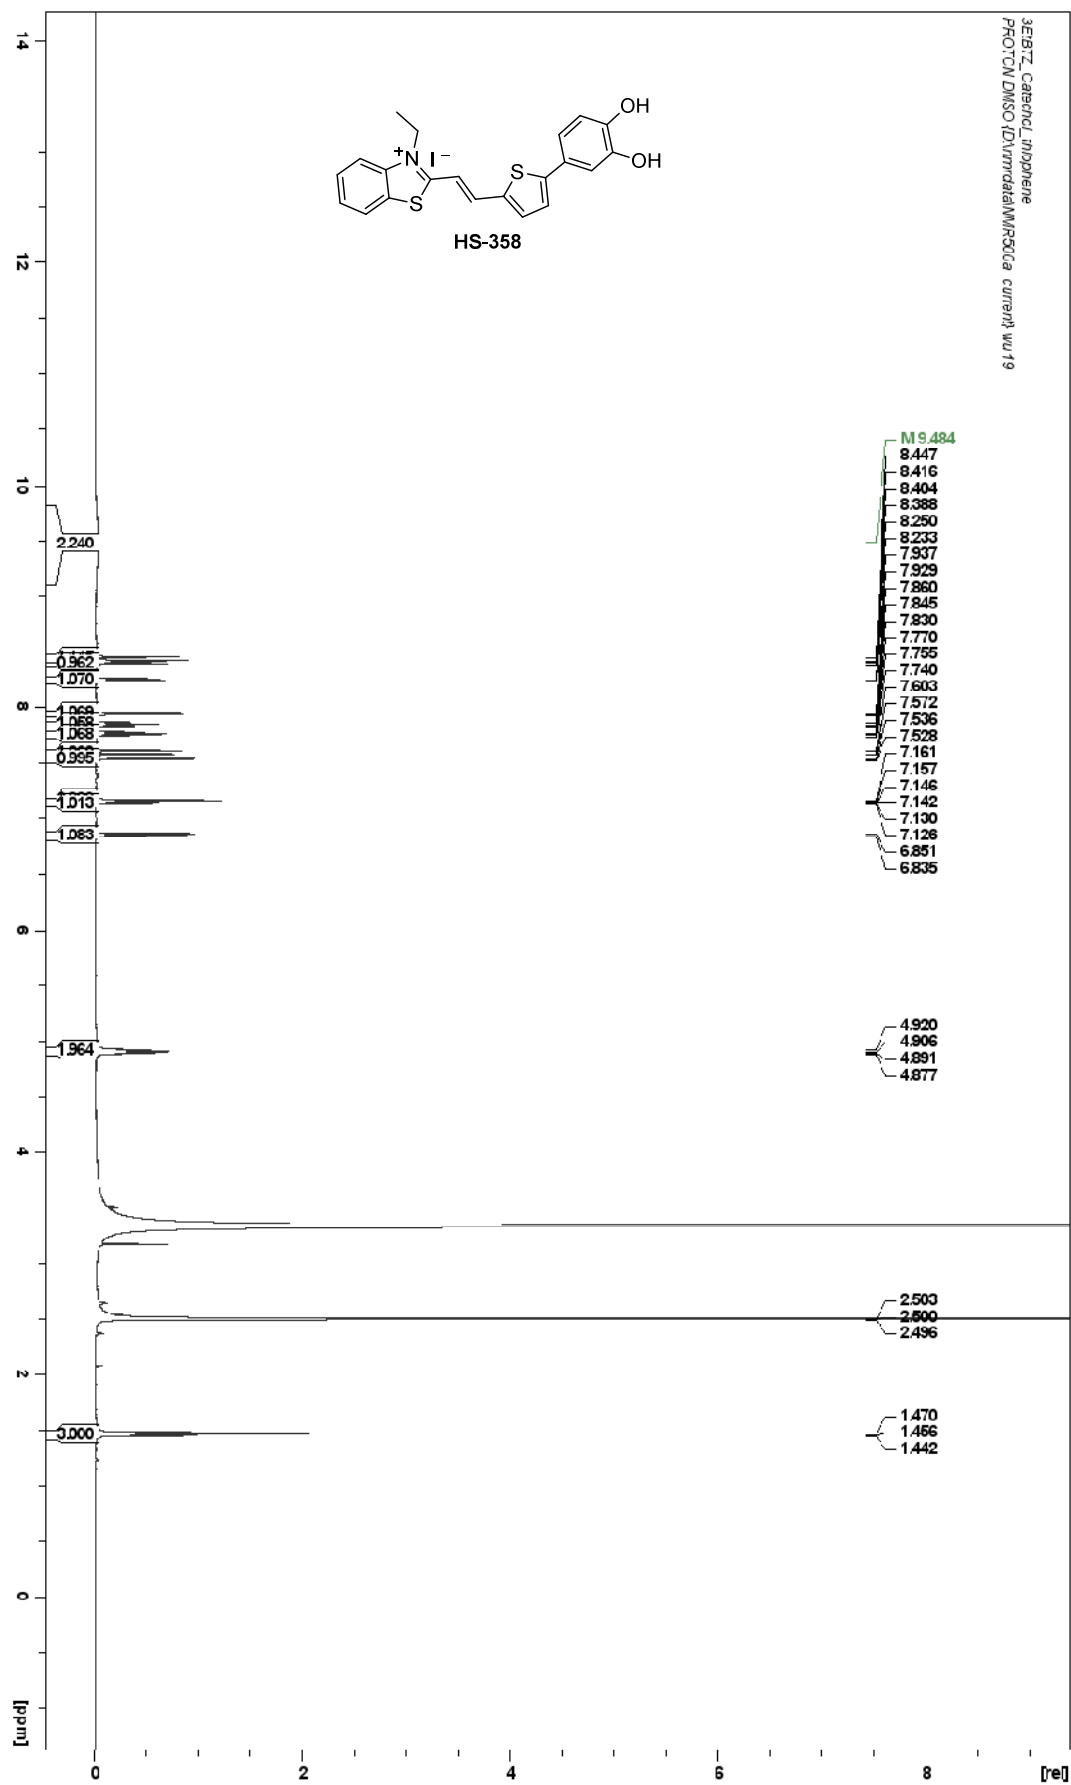

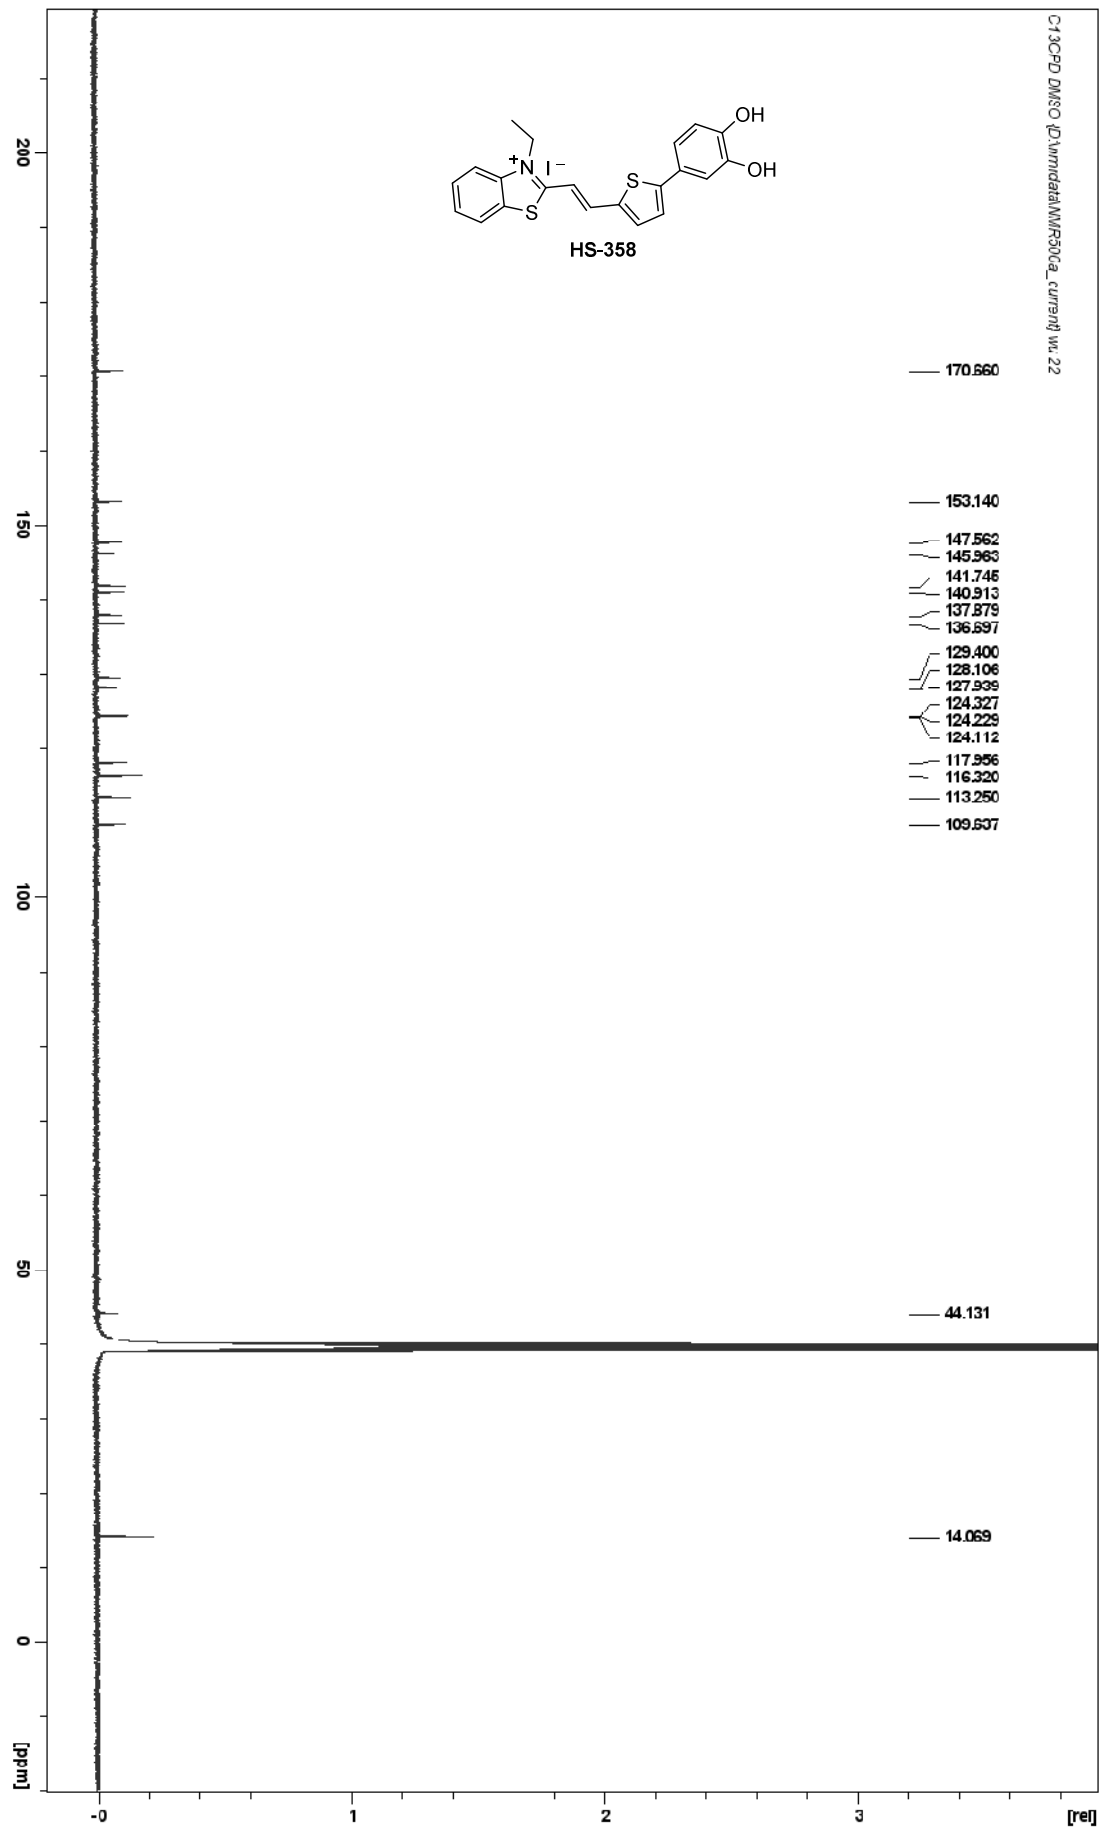

$^1\text{H}$  and  $^{13}\text{C}$ -NMR of ligand HS-359:

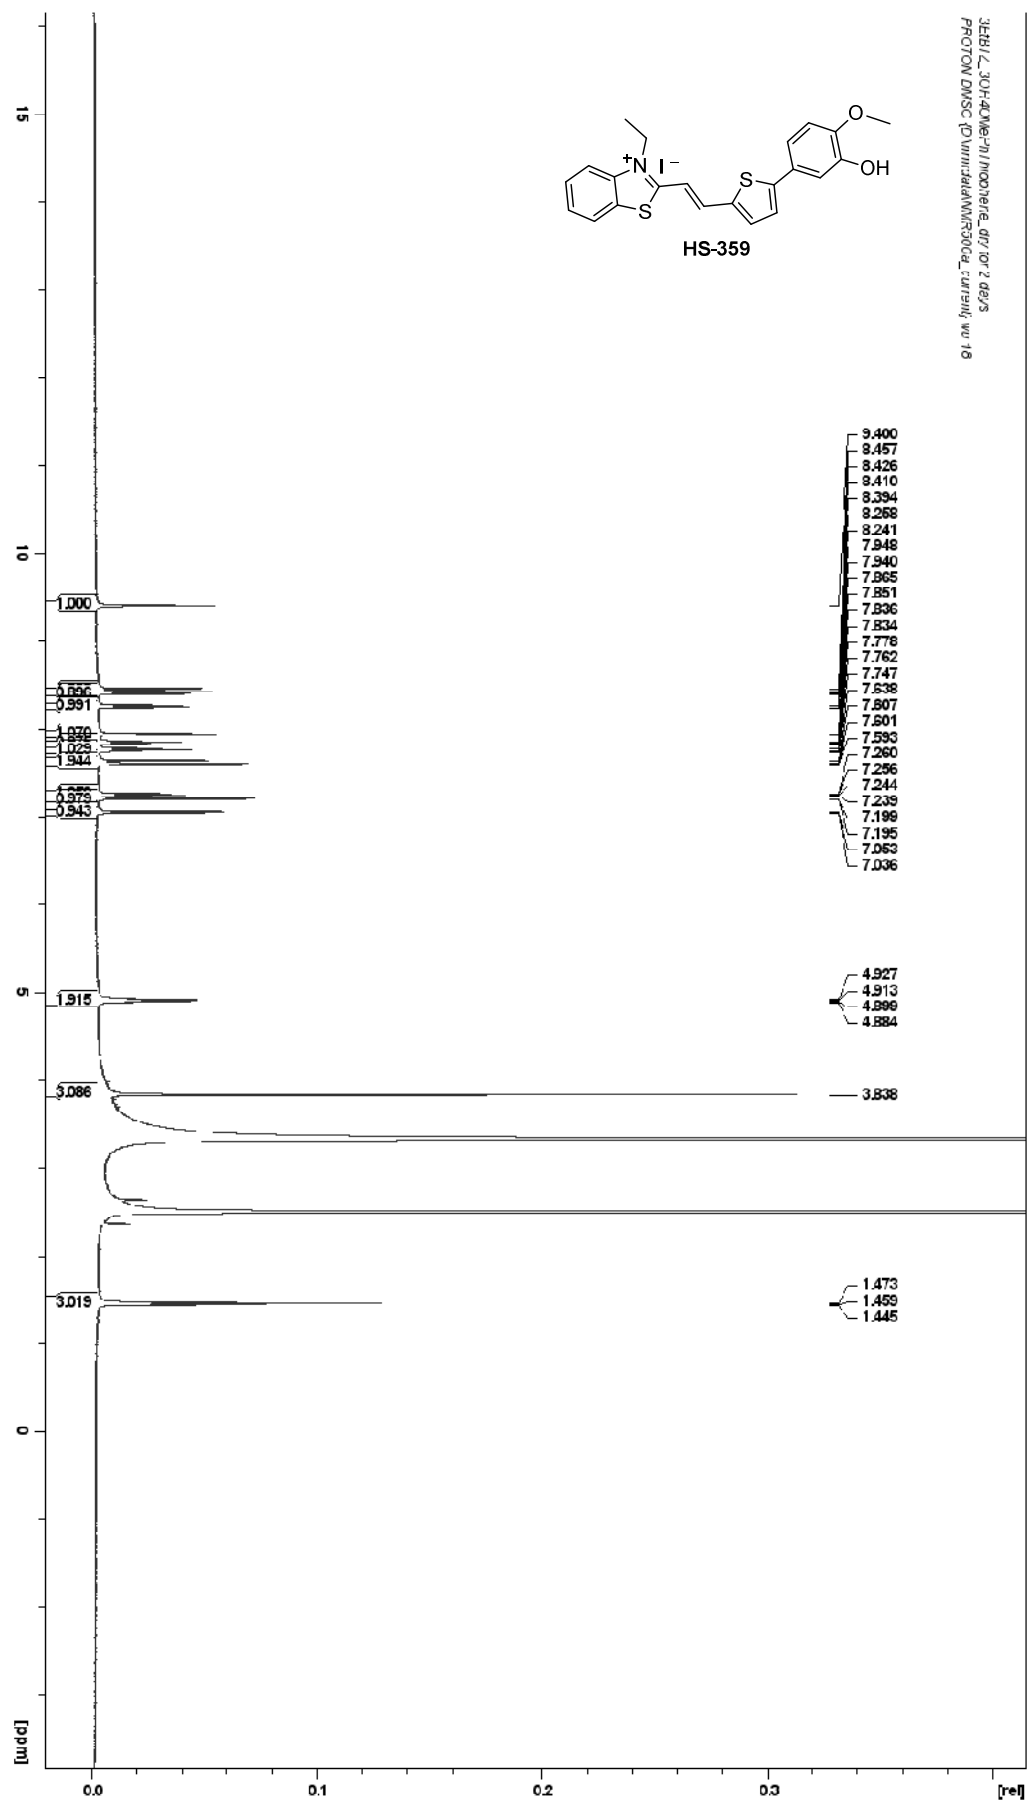

3EBR12\_3H4QMEP71110307ene  
C13CPD DMSO d6\data1\NMR500a current.wi.18

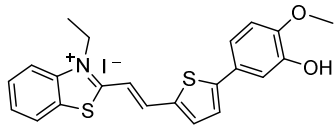

HS-359

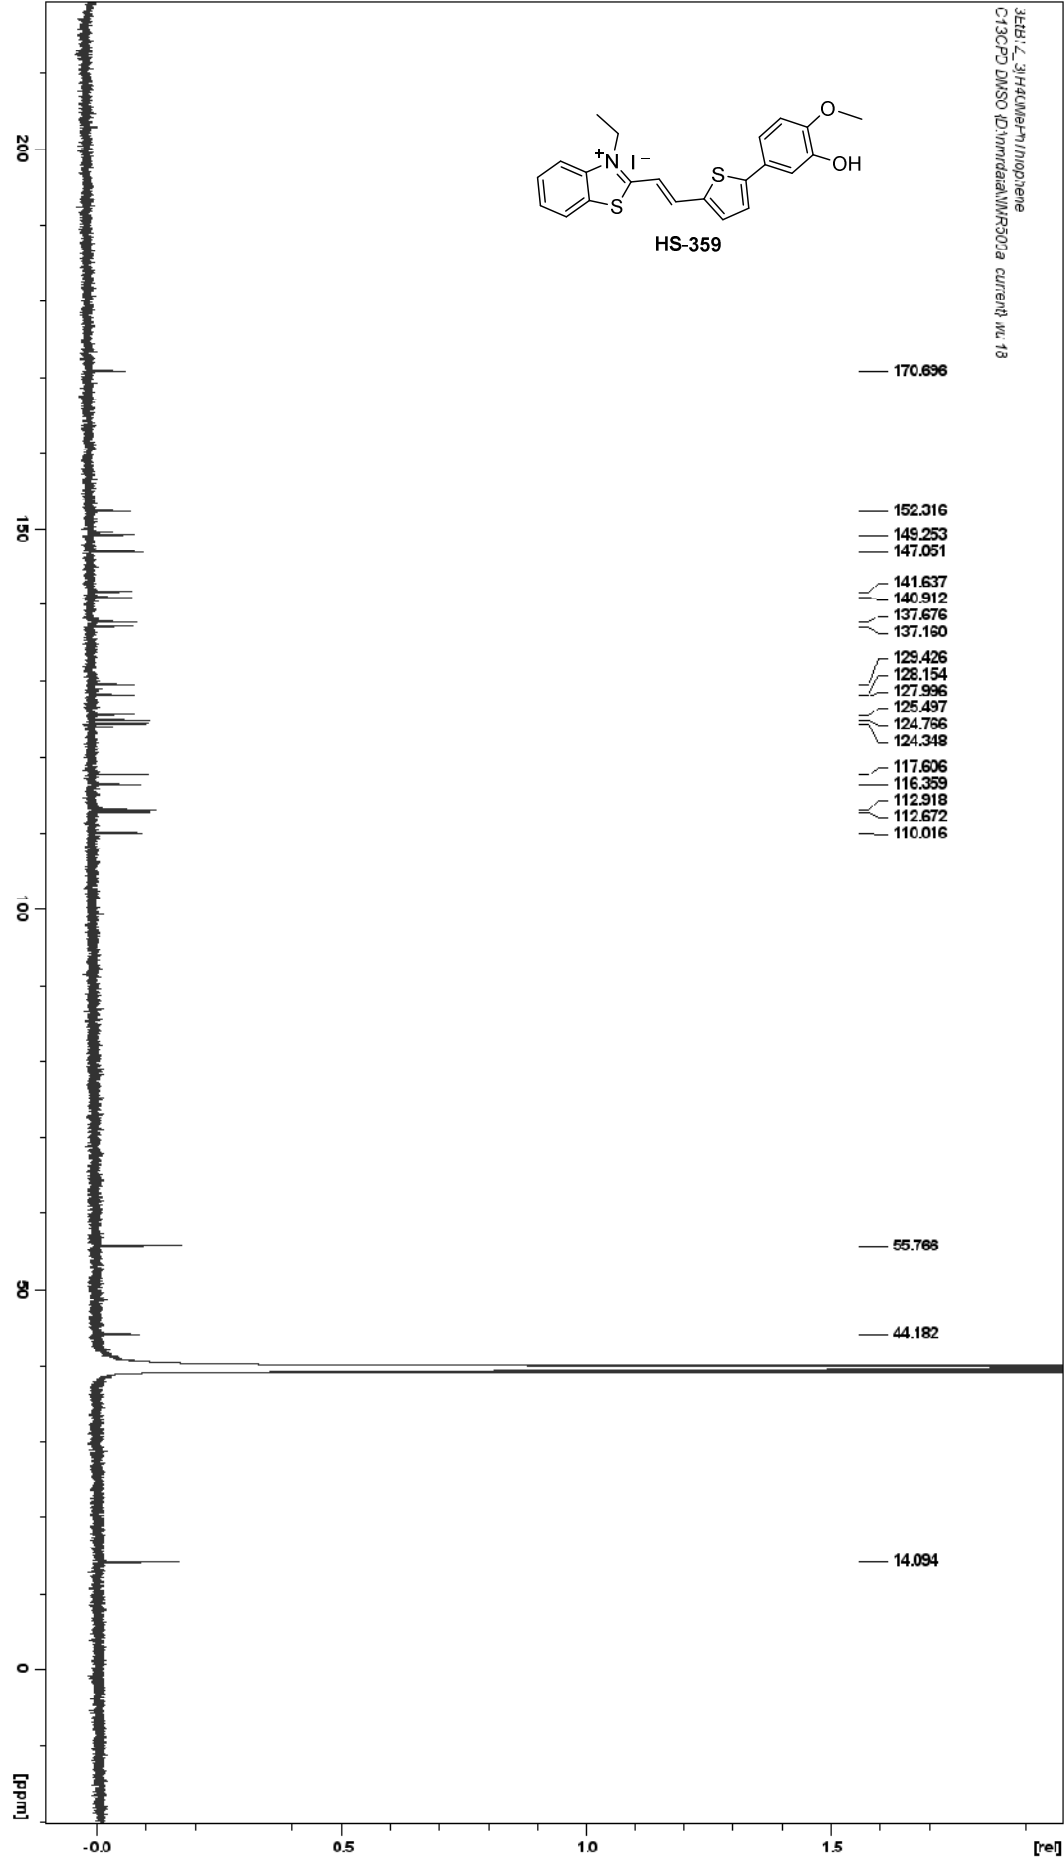

$^1\text{H}$  and  $^{13}\text{C}$ -NMR of ligand HS-360:

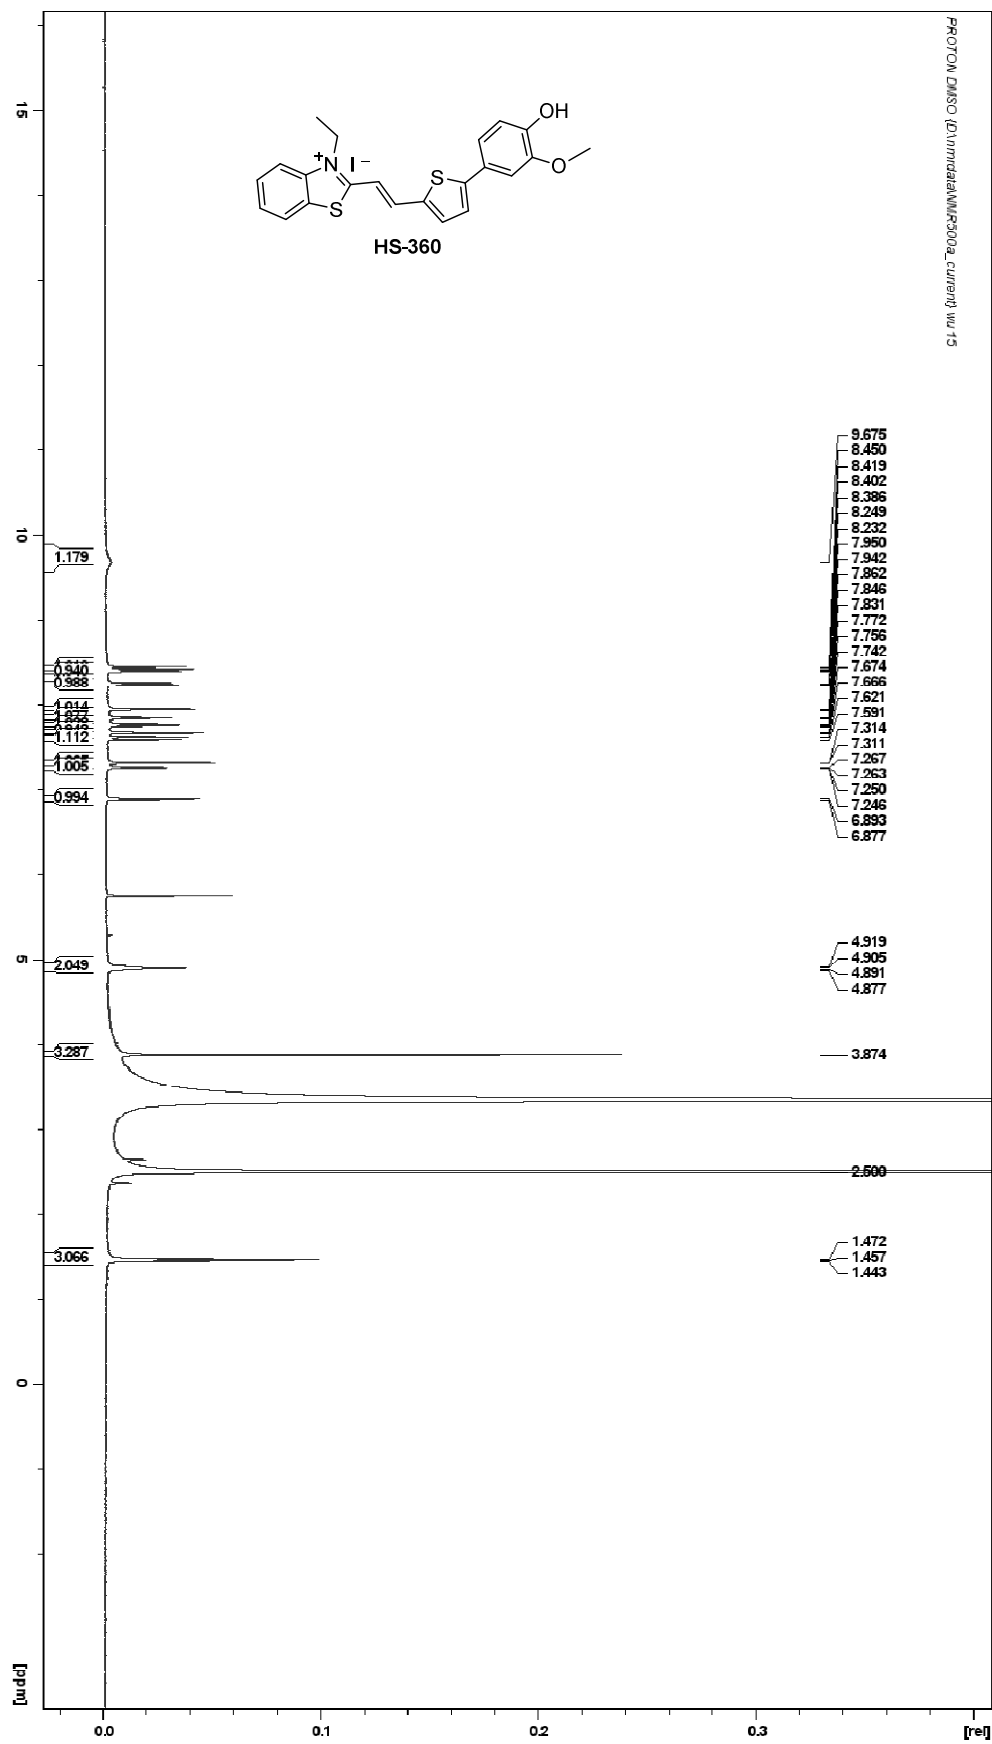



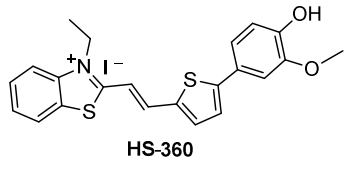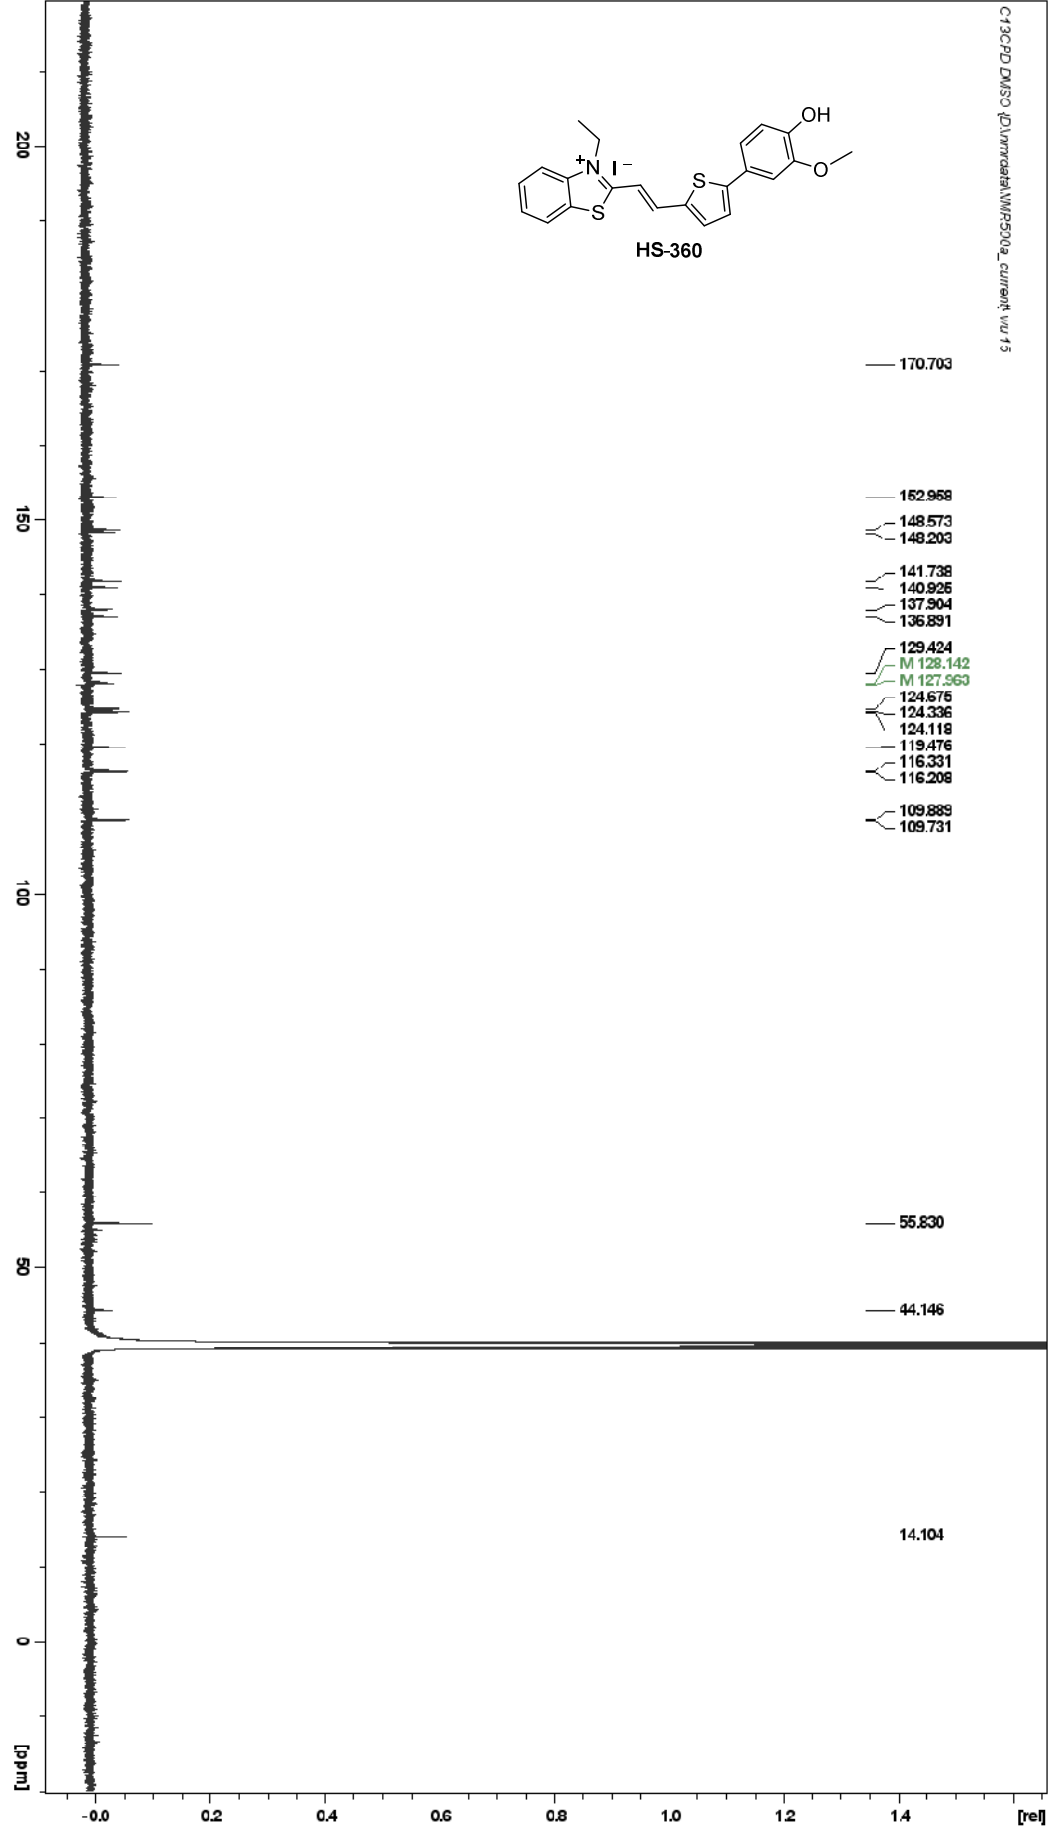

Supplement: OPEN-13-e202400186-s001.pdf [file OPEN-13-e202400186-s001.pdf]
